# Supplementary material
Source: PubMed Central journal article supplement (PMC5076765)
Supplement: NIHMS70172-supplement-eAppendix.pdf [file NIHMS70172-supplement-eAppendix.pdf]

eFigure 2. Top Cause of Death by Country for Children Under 5, Both Sexes, 2013

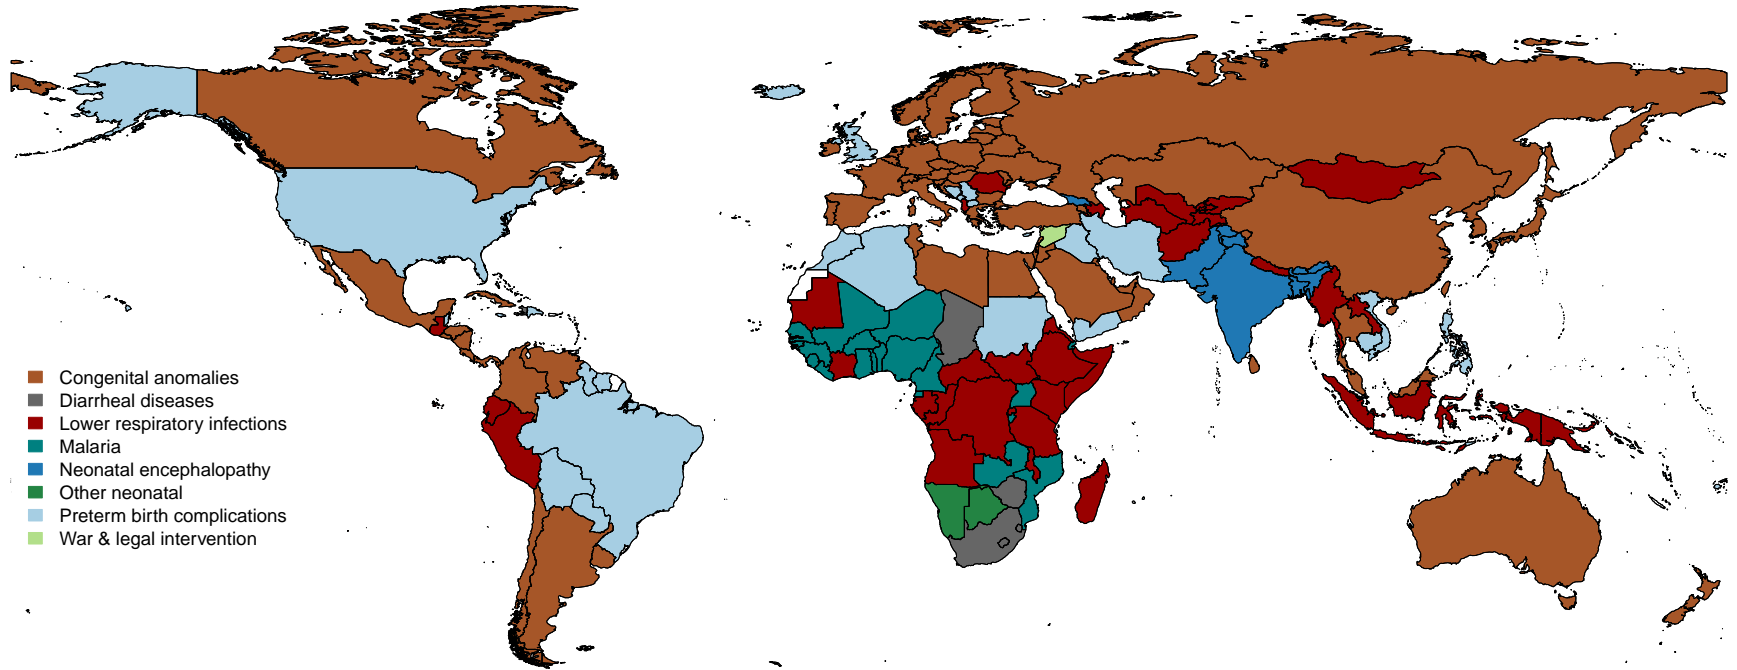

- Congenital anomalies
- Diarrheal diseases
- Lower respiratory infections
- Malaria
- Neonatal encephalopathy
- Other neonatal
- Preterm birth complications
- War & legal intervention

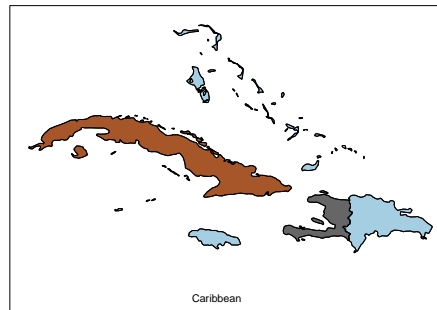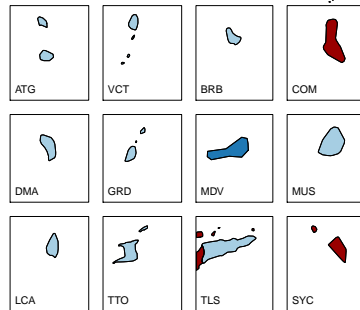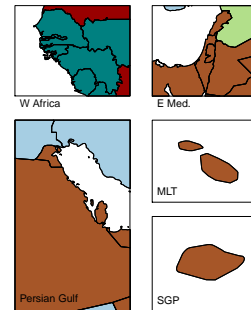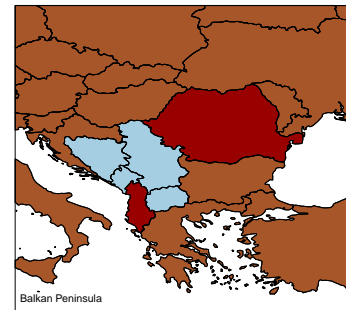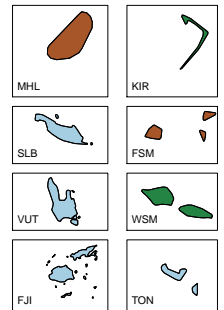

Figure 3. Top 25 Global Causes of Death for the Largest 50 Countries by Pediatric Population, Both Sexes, Ages 5 to 9, 2013

| Location                         | Diarrheal Diseases | Lower Respiratory Infections | Road Injuries | Intestinal Infectious | Malaria | Drowning | HIV/AIDS | Hemoglobinopathies | Congenital Anomalies | Meningitis | Protein-Energy Malnutrition | Measles | Tuberculosis | STDs | Leukemia | Leishmaniasis | Fire & Heat | Falls | Other Neoplasms | Mechanical Forces | Animal Contact | Encephalitis | Epilepsy | Other Unintentional | Cerebrovascular Disease |
|----------------------------------|--------------------|------------------------------|---------------|-----------------------|---------|----------|----------|--------------------|----------------------|------------|-----------------------------|---------|--------------|------|----------|---------------|-------------|-------|-----------------|-------------------|----------------|--------------|----------|---------------------|-------------------------|
| Global                           | 1                  | 2                            | 3             | 4                     | 5       | 6        | 7        | 8                  | 9                    | 10         | 11                          | 12      | 13           | 14   | 15       | 16            | 17          | 18    | 19              | 20                | 21             | 22           | 23       | 24                  | 25                      |
| Developing                       | 1                  | 2                            | 5             | 3                     | 4       | 6        | 7        | 8                  | 9                    | 10         | 11                          | 12      | 13           | 14   | 16       | 15            | 17          | 18    | 20              | 19                | 21             | 22           | 23       | 24                  | 25                      |
| Afghanistan                      | 11                 | 1                            | 2             | 7                     | 12      | 3        | 81       | 15                 | 5                    | 10         | 21                          | 9       | 8            | 55   | 16       | 62            | 18          | 6     | 28              | 14                | 36             | 29           | 17       | 4                   | 31                      |
| Algeria                          | 22                 | 4                            | 1             | 2                     | 72      | 5        | 85       | 10                 | 3                    | 14         | 32                          | 17      | 45           | 26   | 15       | 66            | 28          | 19    | 6               | 34                | 7              | 13           | 20       | 27                  | 8                       |
| Angola                           | 1                  | 2                            | 3             | 10                    | 4       | 8        | 5        | 7                  | 11                   | 6          | 9                           | 33      | 13           | 12   | 30       | 65            | 15          | 19    | 18              | 14                | 23             | 36           | 16       | 25                  | 21                      |
| Argentina                        | 29                 | 5                            | 1             | 35                    | 88      | 6        | 55       | 18                 | 2                    | 10         | 21                          | 86      | 38           | 32   | 3        | 89            | 11          | 24    | 4               | 12                | 51             | 17           | 26       | 13                  | 15                      |
| Bangladesh                       | 11                 | 4                            | 7             | 2                     | 78      | 1        | 62       | 20                 | 3                    | 19         | 8                           | 23      | 37           | 9    | 6        | 5             | 45          | 15    | 12              | 22                | 35             | 32           | 24       | 28                  | 44                      |
| Brazil                           | 18                 | 4                            | 1             | 5                     | 66      | 2        | 71       | 20                 | 3                    | 10         | 24                          | 88      | 46           | 23   | 6        | 52            | 17          | 12    | 8               | 14                | 34             | 16           | 26       | 19                  | 13                      |
| Cameroon                         | 5                  | 4                            | 3             | 7                     | 1       | 10       | 2        | 9                  | 11                   | 6          | 8                           | 12      | 16           | 13   | 45       | 90            | 19          | 15    | 21              | 14                | 34             | 36           | 18       | 22                  | 24                      |
| China                            | 30                 | 7                            | 2             | 22                    | 80      | 1        | 31       | 18                 | 4                    | 16         | 49                          | 77      | 40           | 46   | 3        | 86            | 19          | 5     | 8               | 9                 | 32             | 11           | 17       | 14                  | 10                      |
| Colombia                         | 17                 | 6                            | 1             | 7                     | 54      | 3        | 62       | 25                 | 5                    | 11         | 12                          | 89      | 35           | 24   | 2        | 71            | 20          | 13    | 8               | 16                | 29             | 19           | 21       | 27                  | 15                      |
| Cote d'Ivoire                    | 5                  | 3                            | 4             | 7                     | 1       | 9        | 2        | 10                 | 11                   | 6          | 8                           | 12      | 13           | 20   | 45       | 90            | 18          | 16    | 17              | 14                | 34             | 32           | 19       | 24                  | 23                      |
| Democratic Republic of the Congo | 1                  | 3                            | 8             | 10                    | 4       | 7        | 9        | 2                  | 11                   | 5          | 6                           | 15      | 12           | 13   | 32       | 20            | 14          | 26    | 21              | 17                | 27             | 37           | 19       | 30                  | 23                      |
| Egypt                            | 13                 | 5                            | 3             | 4                     | 81      | 6        | 76       | 14                 | 1                    | 27         | 50                          | 38      | 57           | 70   | 7        | 58            | 31          | 12    | 10              | 20                | 41             | 15           | 16       | 17                  | 2                       |
| Ethiopia                         | 1                  | 5                            | 4             | 9                     | 6       | 13       | 2        | 21                 | 12                   | 7          | 11                          | 3       | 14           | 10   | 41       | 15            | 16          | 23    | 17              | 18                | 27             | 62           | 19       | 25                  | 60                      |
| Ghana                            | 11                 | 4                            | 5             | 8                     | 1       | 10       | 3        | 2                  | 9                    | 7          | 6                           | 12      | 20           | 29   | 32       | 89            | 28          | 19    | 18              | 15                | 42             | 27           | 26       | 30                  | 16                      |
| India                            | 2                  | 3                            | 6             | 1                     | 5       | 4        | 30       | 28                 | 9                    | 20         | 15                          | 32      | 8            | 19   | 25       | 7             | 11          | 14    | 22              | 16                | 10             | 13           | 29       | 31                  | 24                      |
| Indonesia                        | 2                  | 7                            | 3             | 4                     | 23      | 1        | 35       | 14                 | 8                    | 11         | 21                          | 5       | 10           | 15   | 9        | 88            | 28          | 25    | 29              | 27                | 22             | 12           | 16       | 31                  | 41                      |
| Iran                             | 25                 | 5                            | 1             | 3                     | 80      | 4        | 86       | 12                 | 2                    | 13         | 58                          | 21      | 46           | 50   | 6        | 74            | 7           | 11    | 26              | 14                | 16             | 31           | 18       | 10                  | 17                      |
| Iraq                             | 18                 | 5                            | 1             | 3                     | -       | 4        | 59       | 22                 | 2                    | 14         | 39                          | 24      | 45           | 70   | 7        | 9             | 13          | 19    | 11              | 10                | 44             | 17           | 25       | 8                   | 12                      |
| Kenya                            | 2                  | 3                            | 7             | 5                     | 4       | 9        | 1        | 14                 | 11                   | 6          | 8                           | 10      | 12           | 13   | 21       | 33            | 18          | 20    | 16              | 19                | 22             | 49           | 17       | 24                  | 51                      |
| Madagascar                       | 2                  | 4                            | 10            | 8                     | 1       | 15       | 12       | 19                 | 13                   | 9          | 6                           | 5       | 18           | 7    | 34       | 3             | 21          | 32    | 16              | 22                | 30             | 56           | 20       | 41                  | 27                      |
| Malaysia                         | 28                 | 6                            | 1             | 2                     | 67      | 3        | 41       | 20                 | 5                    | 12         | 57                          | 9       | 44           | 32   | 4        | 87            | 18          | 26    | 7               | 23                | 40             | 8            | 15       | 35                  | 13                      |
| Mexico                           | 12                 | 6                            | 1             | 4                     | 88      | 5        | 70       | 25                 | 2                    | 22         | 13                          | 87      | 48           | 36   | 3        | 81            | 24          | 14    | 7               | 18                | 27             | 15           | 19       | 51                  | 20                      |
| Morocco                          | 22                 | 5                            | 1             | 2                     | 74      | 3        | 68       | 25                 | 4                    | 8          | 41                          | 21      | 29           | 7    | 11       | 55            | 20          | 15    | 6               | 12                | 39             | 18           | 16       | 32                  | 10                      |
| Mozambique                       | 3                  | 4                            | 7             | 8                     | 2       | 12       | 1        | 17                 | 11                   | 9          | 10                          | 14      | 13           | 6    | 38       | 5             | 16          | 24    | 15              | 18                | 23             | 59           | 19       | 25                  | 58                      |
| Myanmar                          | 7                  | 4                            | 8             | 3                     | 1       | 2        | 21       | 16                 | 5                    | 11         | 46                          | 9       | 29           | 10   | 6        | 86            | 17          | 12    | 14              | 19                | 36             | 15           | 28       | 40                  | 26                      |
| Nepal                            | 2                  | 5                            | 7             | 1                     | 19      | 4        | 38       | 27                 | 6                    | 18         | 12                          | 42      | 13           | 8    | 10       | 3             | 11          | 14    | 15              | 25                | 9              | 23           | 28       | 24                  | 37                      |
| Niger                            | 1                  | 3                            | 6             | 9                     | 2       | 10       | 14       | 7                  | 12                   | 4          | 5                           | 18      | 13           | 8    | 47       | 87            | 19          | 21    | 22              | 15                | 32             | 40           | 20       | 24                  | 31                      |
| Nigeria                          | 8                  | 5                            | 3             | 9                     | 2       | 10       | 4        | 1                  | 13                   | 6          | 7                           | 12      | 15           | 11   | 45       | 90            | 19          | 16    | 23              | 17                | 20             | 36           | 18       | 14                  | 29                      |
| Pakistan                         | 2                  | 3                            | 5             | 1                     | 10      | 4        | 73       | 24                 | 6                    | 8          | 9                           | 11      | 7            | 28   | 17       | 16            | 13          | 23    | 19              | 27                | 22             | 33           | 18       | 12                  | 41                      |
| Peru                             | 18                 | 2                            | 1             | 6                     | 79      | 7        | 40       | 27                 | 5                    | 16         | 14                          | 90      | 22           | 12   | 3        | 82            | 23          | 21    | 8               | 11                | 47             | 9            | 26       | 39                  | 15                      |
| Philippines                      | 10                 | 2                            | 4             | 1                     | 59      | 3        | 44       | 23                 | 5                    | 9          | 11                          | 7       | 12           | 36   | 8        | 89            | 40          | 25    | 16              | 45                | 24             | 17           | 32       | 29                  | 15                      |
| Saudi Arabia                     | 19                 | 5                            | 1             | 4                     | 63      | 3        | 32       | 11                 | 2                    | 24         | 40                          | 70      | 39           | 44   | 13       | 85            | 10          | 6     | 14              | 7                 | 31             | 23           | 18       | 17                  | 12                      |
| South Africa                     | 4                  | 2                            | 3             | 6                     | 50      | 5        | 1        | 25                 | 13                   | 8          | 18                          | 28      | 7            | 15   | 19       | 69            | 16          | 24    | 11              | 10                | 30             | 37           | 14       | 38                  | 27                      |
| Sudan                            | 6                  | 3                            | 7             | 5                     | 2       | 19       | 16       | 13                 | 4                    | 11         | 46                          | 10      | 18           | 9    | 12       | 1             | 28          | 14    | 22              | 15                | 45             | 34           | 21       | 35                  | 8                       |
| Tanzania                         | 3                  | 4                            | 8             | 7                     | 2       | 11       | 1        | 16                 | 13                   | 9          | 10                          | 12      | 14           | 5    | 34       | 6             | 18          | 20    | 15              | 19                | 24             | 61           | 17       | 26                  | 49                      |
| Thailand                         | 16                 | 3                            | 2             | 4                     | 49      | 1        | 52       | 19                 | 5                    | 11         | 73                          | 35      | 50           | 38   | 6        | 87            | 31          | 22    | 8               | 20                | 29             | 9            | 21       | 17                  | 12                      |
| Turkey                           | 25                 | 5                            | 1             | 3                     | 86      | 9        | 65       | 10                 | 2                    | 26         | 43                          | 15      | 35           | 41   | 4        | 85            | 28          | 11    | 12              | 14                | 24             | 13           | 7        | 16                  | 8                       |
| Uganda                           | 5                  | 3                            | 4             | 8                     | 1       | 11       | 2        | 17                 | 13                   | 6          | 10                          | 15      | 14           | 7    | 23       | 30            | 12          | 40    | 20              | 18                | 16             | 53           | 19       | 84                  | 48                      |
| Uzbekistan                       | 22                 | 1                            | 3             | 35                    | -       | 2        | 83       | 23                 | 5                    | 13         | 57                          | 85      | 41           | 48   | 4        | 79            | 10          | 7     | 12              | 17                | 31             | 6            | 11       | 9                   | 38                      |
| Venezuela                        | 12                 | 8                            | 1             | 4                     | 69      | 5        | 63       | 22                 | 2                    | 16         | 14                          | 90      | 42           | 9    | 3        | 73            | 24          | 18    | 6               | 11                | 29             | 19           | 21       | 20                  | 23                      |
| Vietnam                          | 14                 | 6                            | 2             | 4                     | 26      | 1        | 56       | 15                 | 3                    | 23         | 52                          | 7       | 20           | 21   | 5        | 86            | 39          | 22    | 11              | 12                | 19             | 8            | 13       | 18                  | 50                      |
| Yemen                            | 4                  | 3                            | 2             | 6                     | 1       | 7        | 55       | 18                 | 5                    | 9          | 43                          | 11      | 13           | 19   | 12       | 17            | 10          | 14    | 23              | 15                | 47             | 38           | 22       | 20                  | 8                       |
| Developed                        | 33                 | 7                            | 1             | 18                    | 87      | 2        | 56       | 26                 | 3                    | 22         | 45                          | 81      | 48           | 39   | 5        | 83            | 8           | 13    | 6               | 11                | 41             | 21           | 16       | 25                  | 24                      |
| France                           | 27                 | 13                           | 1             | 10                    | -       | 7        | 77       | 23                 | 4                    | 25         | 69                          | 79      | 46           | 50   | 5        | 84            | 15          | 12    | 2               | 17                | 42             | 22           | 14       | 28                  | 18                      |
| Germany                          | 26                 | 11                           | 3             | 32                    | -       | 7        | 80       | 21                 | 1                    | 20         | 66                          | 68      | 62           | 39   | 5        | -             | 14          | 16    | 4               | 12                | 46             | 19           | 8        | 28                  | 25                      |
| Italy                            | 40                 | 11                           | 2             | 7                     | -       | 10       | 79       | 14                 | 4                    | 21         | 63                          | 82      | 52           | 24   | 3        | 81            | 22          | 13    | 1               | 12                | 54             | 15           | 19       | 30                  | 16                      |
| Japan                            | 32                 | 6                            | 1             | 12                    | -       | 3        | 84       | 17                 | 4                    | 24         | 65                          | 79      | 63           | 28   | 5        | -             | 9           | 14    | 2               | 19                | 47             | 21           | 18       | 41                  | 20                      |
| Russia                           | 39                 | 5                            | 2             | 21                    | -       | 1        | 33       | 47                 | 3                    | 18         | 27                          | 83      | 42           | 48   | 7        | -             | 6           | 11    | 8               | 12                | 34             | 19           | 20       | 14                  | 28                      |
| South Korea                      | 39                 | 9                            | 1             | 13                    | 86      | 2        | 84       | 22                 | 5                    | 29         | 71                          | 79      | 28           | 30   | 3        | -             | 12          | 7     | 6               | 15                | 36             | 14           | 10       | 34                  | 17                      |
| United Kingdom                   | 24                 | 9                            | 1             | 11                    | -       | 8        | 81       | 23                 | 2                    | 17         | 73                          | 80      | 53           | 52   | 3        | -             | 14          | 15    | 5               | 13                | 44             | 22           | 10       | 45                  | 27                      |
| United States                    | 33                 | 10                           | 1             | 26                    | -       | 5        | 77       | 21                 | 2                    | 20         | 72                          | 84      | 65           | 44   | 6        | -             | 7           | 23    | 4               | 11                | 37             | 25           | 24       | 42                  | 17                      |

eFigure 4. Top Cause of Death by Country for Ages 5 to 9, Both Sexes, 2013

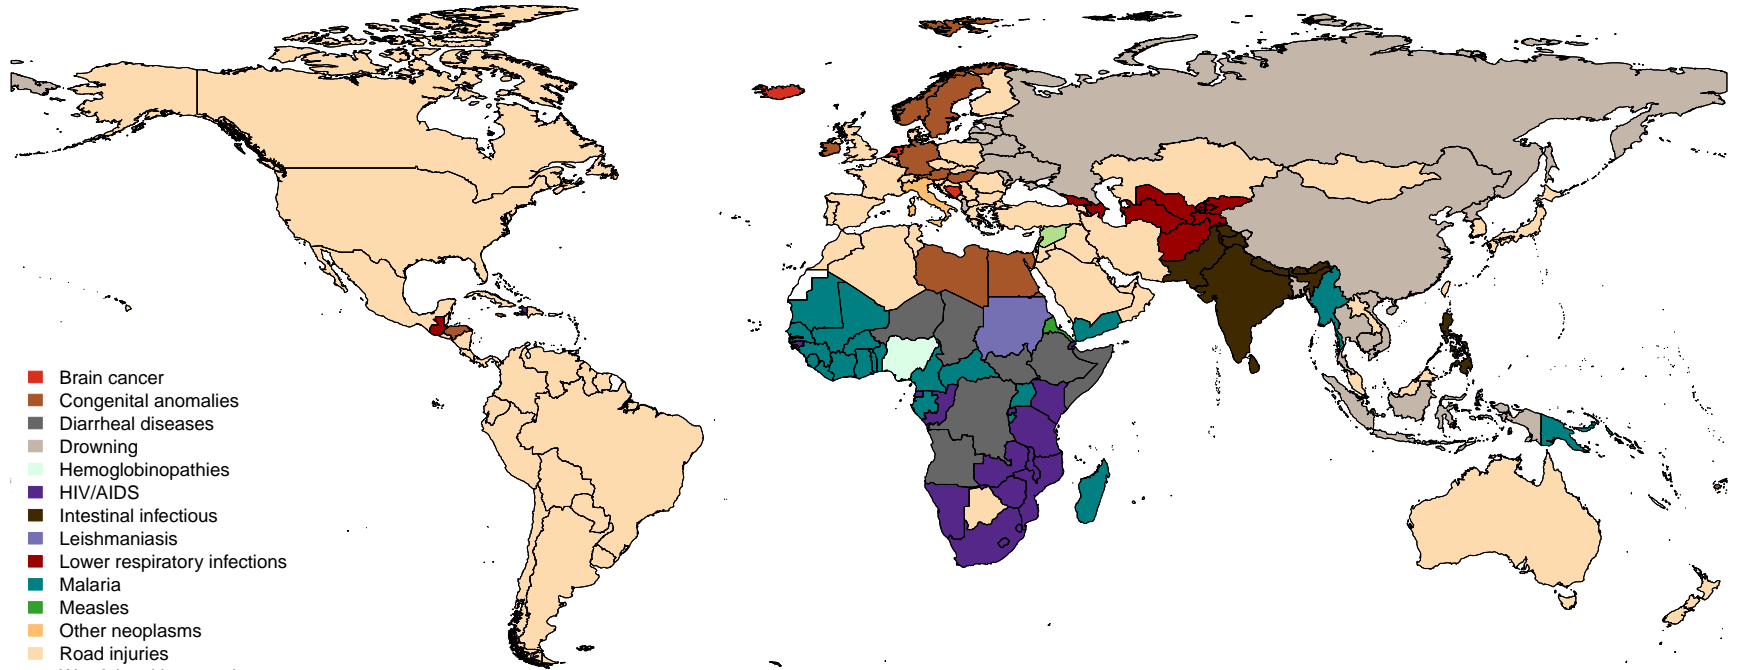

- Brain cancer
- Congenital anomalies
- Diarrheal diseases
- Drowning
- Hemoglobinopathies
- HIV/AIDS
- Intestinal infectious
- Leishmaniasis
- Lower respiratory infections
- Malaria
- Measles
- Other neoplasms
- Road injuries
- War & legal intervention

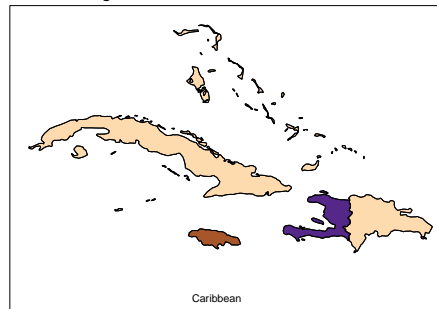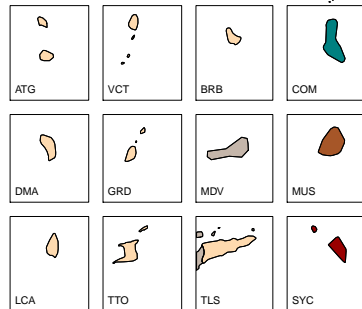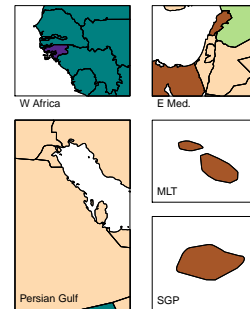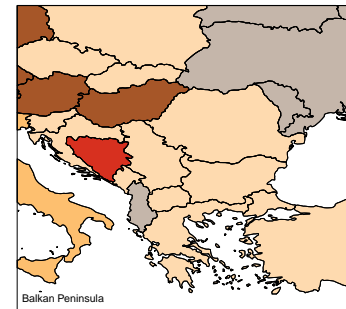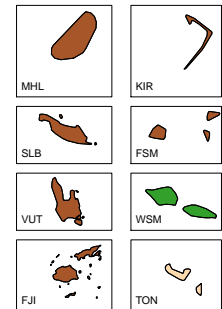



eFigure 5. Top 25 Global Causes of Death for the Largest 50 Countries by Pediatric Population, Ages 10 to 19, Both Sexes, 2013

| Location                         | Road Injuries | HIV/AIDS | Self-Harm | Drowning | Intestinal Infections | Interpersonal Violence | Lower Respiratory Infections | Diarrheal Diseases | Malaria | Tuberculosis | Maternal Disorders | Hemoglobinopathies | Congenital Anomalies | Leukemia | Meningitis | Ischemic Heart Disease | Fire and Heat | Cerebrovascular Disease | Other Neoplasms | Falls | Mechanical Forces | Epilepsy | Other Unintentional | Chronic Kidney Disease | Leishmaniasis |
|----------------------------------|---------------|----------|-----------|----------|-----------------------|------------------------|------------------------------|--------------------|---------|--------------|--------------------|--------------------|----------------------|----------|------------|------------------------|---------------|-------------------------|-----------------|-------|-------------------|----------|---------------------|------------------------|---------------|
| Global                           | 1             | 2        | 3         | 4        | 5                     | 6                      | 7                            | 8                  | 9       | 10           | 11                 | 12                 | 13                   | 14       | 15         | 16                     | 17            | 18                      | 19              | 20    | 21                | 22       | 23                  | 24                     | 25            |
| Developing                       | 1             | 2        | 3         | 4        | 5                     | 6                      | 7                            | 8                  | 9       | 10           | 11                 | 12                 | 14                   | 15       | 13         | 16                     | 17            | 18                      | 21              | 19    | 20                | 22       | 23                  | 24                     | 25            |
| Afghanistan                      | 1             | 102      | 13        | 3        | 9                     | 5                      | 4                            | 14                 | 10      | 7            | 6                  | 15                 | 8                    | 19       | 16         | 23                     | 22            | 18                      | 29              | 11    | 12                | 17       | 2                   | 20                     | 91            |
| Algeria                          | 1             | 95       | 19        | 2        | 3                     | 20                     | 4                            | 36                 | 84      | 27           | 37                 | 12                 | 9                    | 11       | 17         | 6                      | 21            | 5                       | 10              | 28    | 45                | 15       | 23                  | 7                      | 97            |
| Angola                           | 2             | 1        | 8         | 6        | 13                    | 14                     | 4                            | 3                  | 11      | 9            | 5                  | 10                 | 15                   | 37       | 7          | 47                     | 23            | 18                      | 20              | 21    | 12                | 16       | 28                  | 19                     | 81            |
| Argentina                        | 1             | 38       | 2         | 4        | 59                    | 3                      | 9                            | 51                 | 124     | 36           | 17                 | 29                 | 10                   | 6        | 21         | 13                     | 24            | 11                      | 8               | 31    | 5                 | 23       | 12                  | 19                     | 127           |
| Bangladesh                       | 4             | 84       | 1         | 3        | 2                     | 10                     | 20                           | 24                 | 101     | 32           | 9                  | 27                 | 11                   | 7        | 22         | 16                     | 64            | 21                      | 6               | 17    | 40                | 8        | 12                  | 18                     | 14            |
| Brazil                           | 2             | 31       | 4         | 3        | 9                     | 1                      | 5                            | 42                 | 94      | 37           | 13                 | 27                 | 8                    | 6        | 14         | 12                     | 36            | 10                      | 7               | 16    | 17                | 23       | 15                  | 18                     | 82            |
| Cameroon                         | 2             | 1        | 12        | 10       | 9                     | 14                     | 6                            | 7                  | 3       | 11           | 4                  | 8                  | 15                   | 46       | 5          | 26                     | 35            | 22                      | 31              | 17    | 24                | 23       | 30                  | 16                     | 127           |
| China                            | 1             | 48       | 3         | 2        | 46                    | 10                     | 16                           | 57                 | 108     | 28           | 39                 | 23                 | 5                    | 4        | 29         | 9                      | 33            | 8                       | 11              | 6     | 7                 | 15       | 14                  | 17                     | 124           |
| Colombia                         | 2             | 45       | 3         | 4        | 12                    | 1                      | 6                            | 35                 | 70      | 32           | 13                 | 31                 | 8                    | 5        | 20         | 11                     | 33            | 9                       | 7               | 15    | 10                | 14       | 19                  | 16                     | 108           |
| Cote d'Ivoire                    | 2             | 1        | 13        | 10       | 8                     | 61                     | 5                            | 7                  | 3       | 9            | 6                  | 11                 | 14                   | 44       | 4          | 26                     | 31            | 18                      | 27              | 16    | 21                | 19       | 32                  | 17                     | 127           |
| Democratic Republic of the Congo | 4             | 2        | 10        | 11       | 12                    | 13                     | 5                            | 3                  | 7       | 8            | 9                  | 1                  | 18                   | 35       | 6          | 53                     | 23            | 20                      | 22              | 25    | 17                | 16       | 34                  | 21                     | 27            |
| Egypt                            | 1             | 105      | 11        | 3        | 6                     | 25                     | 7                            | 34                 | 108     | 46           | 44                 | 18                 | 5                    | 9        | 38         | 4                      | 35            | 2                       | 14              | 17    | 23                | 22       | 16                  | 13                     | 85            |
| Ethiopia                         | 2             | 1        | 10        | 11       | 9                     | 8                      | 6                            | 3                  | 14      | 4            | 5                  | 24                 | 16                   | 46       | 7          | 45                     | 25            | 44                      | 22              | 20    | 26                | 12       | 30                  | 18                     | 15            |
| Ghana                            | 2             | 1        | 10        | 17       | 8                     | 19                     | 6                            | 11                 | 4       | 15           | 7                  | 3                  | 14                   | 36       | 5          | 18                     | 34            | 20                      | 29              | 21    | 24                | 26       | 40                  | 13                     | 126           |
| India                            | 3             | 14       | 1         | 5        | 2                     | 19                     | 8                            | 4                  | 9       | 6            | 10                 | 33                 | 18                   | 28       | 26         | 11                     | 7             | 20                      | 22              | 17    | 16                | 35       | 25                  | 50                     | 21            |
| Indonesia                        | 1             | 64       | 17        | 2        | 5                     | 25                     | 6                            | 4                  | 24      | 3            | 11                 | 21                 | 7                    | 8        | 9          | 35                     | 40            | 18                      | 34              | 19    | 33                | 12       | 23                  | 14                     | 124           |
| Iran                             | 1             | 110      | 2         | 3        | 5                     | 9                      | 12                           | 41                 | 103     | 43           | 37                 | 15                 | 6                    | 7        | 26         | 8                      | 4             | 14                      | 21              | 18    | 11                | 24       | 10                  | 22                     | 109           |
| Iraq                             | 2             | 68       | 11        | 4        | 7                     | 1                      | 12                           | 28                 | -       | 26           | 23                 | 18                 | 5                    | 10       | 22         | 8                      | 14            | 13                      | 16              | 20    | 6                 | 25       | 3                   | 9                      | 19            |
| Kenya                            | 3             | 1        | 12        | 10       | 8                     | 11                     | 6                            | 2                  | 7       | 4            | 13                 | 16                 | 15                   | 23       | 5          | 49                     | 21            | 33                      | 19              | 18    | 24                | 9        | 27                  | 17                     | 47            |
| Madagascar                       | 5             | 8        | 18        | 14       | 10                    | 25                     | 4                            | 3                  | 2       | 13           | 7                  | 22                 | 19                   | 38       | 6          | 58                     | 37            | 11                      | 24              | 35    | 32                | 15       | 53                  | 26                     | 1             |
| Malaysia                         | 1             | 32       | 5         | 2        | 8                     | 6                      | 4                            | 43                 | 91      | 37           | 40                 | 17                 | 9                    | 7        | 19         | 15                     | 35            | 10                      | 11              | 29    | 16                | 23       | 36                  | 22                     | 124           |
| Mexico                           | 1             | 57       | 3         | 4        | 12                    | 2                      | 9                            | 25                 | 124     | 36           | 17                 | 31                 | 7                    | 5        | 32         | 13                     | 40            | 16                      | 8               | 14    | 11                | 15       | 28                  | 6                      | 121           |
| Morocco                          | 1             | 81       | 4         | 3        | 6                     | 14                     | 7                            | 31                 | 104     | 19           | 24                 | 29                 | 12                   | 10       | 17         | 5                      | 27            | 8                       | 9               | 21    | 13                | 16       | 32                  | 15                     | 88            |
| Mozambique                       | 3             | 1        | 14        | 13       | 11                    | 10                     | 6                            | 5                  | 2       | 7            | 8                  | 19                 | 17                   | 38       | 9          | 46                     | 20            | 43                      | 18              | 22    | 23                | 12       | 28                  | 16                     | 4             |
| Myanmar                          | 2             | 16       | 14        | 3        | 6                     | 11                     | 5                            | 13                 | 1       | 9            | 12                 | 18                 | 7                    | 4        | 10         | 55                     | 19            | 25                      | 15              | 8     | 17                | 20       | 34                  | 23                     | 123           |
| Nepal                            | 2             | 37       | 1         | 4        | 3                     | 10                     | 12                           | 5                  | 24      | 8            | 7                  | 30                 | 18                   | 9        | 23         | 19                     | 16            | 26                      | 15              | 17    | 33                | 20       | 11                  | 40                     | 6             |
| Niger                            | 3             | 9        | 24        | 12       | 10                    | 29                     | 6                            | 1                  | 5       | 8            | 2                  | 7                  | 17                   | 46       | 4          | 27                     | 32            | 36                      | 28              | 21    | 19                | 23       | 33                  | 20                     | 125           |
| Nigeria                          | 2             | 3        | 64        | 12       | 8                     | 26                     | 6                            | 10                 | 4       | 9            | 5                  | 1                  | 15                   | 45       | 7          | 32                     | 36            | 28                      | 25              | 11    | 22                | 13       | 20                  | 21                     | 127           |
| Pakistan                         | 2             | 83       | 13        | 8        | 1                     | 5                      | 12                           | 6                  | 25      | 4            | 3                  | 20                 | 24                   | 10       | 11         | 15                     | 32            | 19                      | 27              | 26    | 35                | 14       | 7                   | 16                     | 30            |
| Peru                             | 1             | 53       | 3         | 8        | 14                    | 7                      | 2                            | 33                 | 103     | 11           | 18                 | 30                 | 13                   | 4        | 22         | 5                      | 34            | 9                       | 12              | 25    | 10                | 16       | 32                  | 15                     | 113           |
| Philippines                      | 2             | 34       | 12        | 3        | 4                     | 5                      | 1                            | 18                 | 61      | 9            | 24                 | 23                 | 7                    | 8        | 11         | 10                     | 53            | 14                      | 15              | 25    | 40                | 22       | 20                  | 16                     | 125           |
| Saudi Arabia                     | 1             | 37       | 7         | 2        | 4                     | 17                     | 8                            | 38                 | 70      | 24           | 49                 | 13                 | 3                    | 16       | 34         | 10                     | 20            | 14                      | 18              | 6     | 9                 | 11       | 15                  | 12                     | 121           |
| South Africa                     | 3             | 1        | 4         | 10       | 14                    | 2                      | 5                            | 8                  | 57      | 6            | 19                 | 34                 | 20                   | 24       | 13         | 32                     | 18            | 23                      | 17              | 27    | 7                 | 9        | 33                  | 22                     | 103           |
| Sudan                            | 1             | 14       | 10        | 9        | 6                     | 15                     | 4                            | 12                 | 5       | 19           | 3                  | 18                 | 8                    | 13       | 22         | 11                     | 35            | 7                       | 21              | 23    | 16                | 20       | 37                  | 25                     | 2             |
| Tanzania                         | 6             | 1        | 14        | 12       | 9                     | 11                     | 7                            | 3                  | 2       | 5            | 8                  | 17                 | 15                   | 41       | 10         | 42                     | 23            | 44                      | 18              | 20    | 25                | 13       | 30                  | 21                     | 4             |
| Thailand                         | 1             | 27       | 4         | 2        | 12                    | 3                      | 6                            | 36                 | 55      | 46           | 43                 | 26                 | 11                   | 8        | 18         | 13                     | 37            | 7                       | 15              | 17    | 10                | 20       | 9                   | 14                     | 124           |
| Turkey                           | 1             | 93       | 2         | 8        | 4                     | 6                      | 7                            | 41                 | 122     | 39           | 57                 | 19                 | 16                   | 3        | 38         | 17                     | 29            | 10                      | 13              | 14    | 5                 | 9        | 20                  | 21                     | 121           |
| Uganda                           | 2             | 1        | 104       | 11       | 10                    | 9                      | 4                            | 7                  | 3       | 5            | 8                  | 16                 | 17                   | 23       | 6          | 42                     | 45            | 37                      | 19              | 86    | 20                | 13       | 110                 | 18                     | 41            |
| Uzbekistan                       | 3             | 77       | 2         | 1        | 56                    | 12                     | 4                            | 46                 | -       | 23           | 40                 | 31                 | 17                   | 5        | 15         | 21                     | 18            | 30                      | 14              | 9     | 19                | 6        | 10                  | 7                      | 113           |
| Venezuela                        | 2             | 44       | 3         | 4        | 10                    | 1                      | 9                            | 27                 | 88      | 36           | 12                 | 25                 | 7                    | 6        | 20         | 16                     | 30            | 15                      | 8               | 17    | 5                 | 14       | 13                  | 11                     | 115           |
| Vietnam                          | 1             | 47       | 5         | 2        | 9                     | 6                      | 8                            | 33                 | 25      | 15           | 24                 | 19                 | 4                    | 3        | 27         | 71                     | 43            | 22                      | 12              | 14    | 16                | 10       | 7                   | 28                     | 123           |
| Yemen                            | 1             | 65       | 12        | 5        | 7                     | 9                      | 3                            | 8                  | 2       | 14           | 4                  | 18                 | 10                   | 13       | 22         | 11                     | 16            | 6                       | 21              | 25    | 15                | 19       | 20                  | 24                     | 28            |
| Developed                        | 1             | 42       | 2         | 4        | 33                    | 3                      | 12                           | 57                 | 123     | 45           | 40                 | 31                 | 6                    | 7        | 26         | 21                     | 20            | 19                      | 5               | 14    | 15                | 17       | 24                  | 30                     | 119           |
| France                           | 1             | 53       | 2         | 8        | 24                    | 11                     | 20                           | 45                 | -       | 61           | 51                 | 30                 | 5                    | 4        | 33         | 23                     | 26            | 18                      | 3               | 14    | 19                | 13       | 25                  | 38                     | 120           |
| Germany                          | 1             | 76       | 2         | 13       | 52                    | 11                     | 15                           | 42                 | -       | 82           | 54                 | 32                 | 3                    | 5        | 23         | 19                     | 24            | 21                      | 4               | 18    | 17                | 9        | 25                  | 30                     | -             |
| Italy                            | 1             | 32       | 2         | 8        | 21                    | 11                     | 18                           | 67                 | -       | 61           | 69                 | 17                 | 5                    | 4        | 28         | 16                     | 31            | 15                      | 3               | 12    | 13                | 19       | 26                  | 25                     | 115           |
| Japan                            | 2             | 110      | 1         | 5        | 22                    | 15                     | 7                            | 47                 | -       | 60           | 85                 | 18                 | 6                    | 4        | 34         | 10                     | 20            | 16                      | 3               | 12    | 21                | 14       | 52                  | 29                     | -             |
| Russia                           | 2             | 37       | 1         | 3        | 33                    | 4                      | 10                           | 73                 | -       | 28           | 44                 | 61                 | 7                    | 9        | 27         | 24                     | 14            | 20                      | 11              | 6     | 16                | 21       | 15                  | 34                     | -             |
| South Korea                      | 2             | 96       | 1         | 3        | 27                    | 7                      | 15                           | 53                 | 122     | 26           | 55                 | 22                 | 8                    | 4        | 36         | 14                     | 16            | 13                      | 5               | 12    | 17                | 10       | 33                  | 21                     | -             |
| United Kingdom                   | 1             | 106      | 2         | 15       | 22                    | 18                     | 12                           | 45                 | -       | 64           | 42                 | 36                 | 4                    | 6        | 20         | 32                     | 25            | 21                      | 3               | 13    | 11                | 10       | 43                  | 31                     | -             |
| United States                    | 1             | 40       | 2         | 5        | 42                    | 3                      | 15                           | 49                 | -       | 83           | 32                 | 27                 | 6                    | 8        | 29         | 18                     | 16            | 19                      | 7               | 20    | 12                | 23       | 37                  | 30                     | -             |

eFigure 6. Top Cause of Death by Country for Ages 10 to 19, Both Sexes, 2013

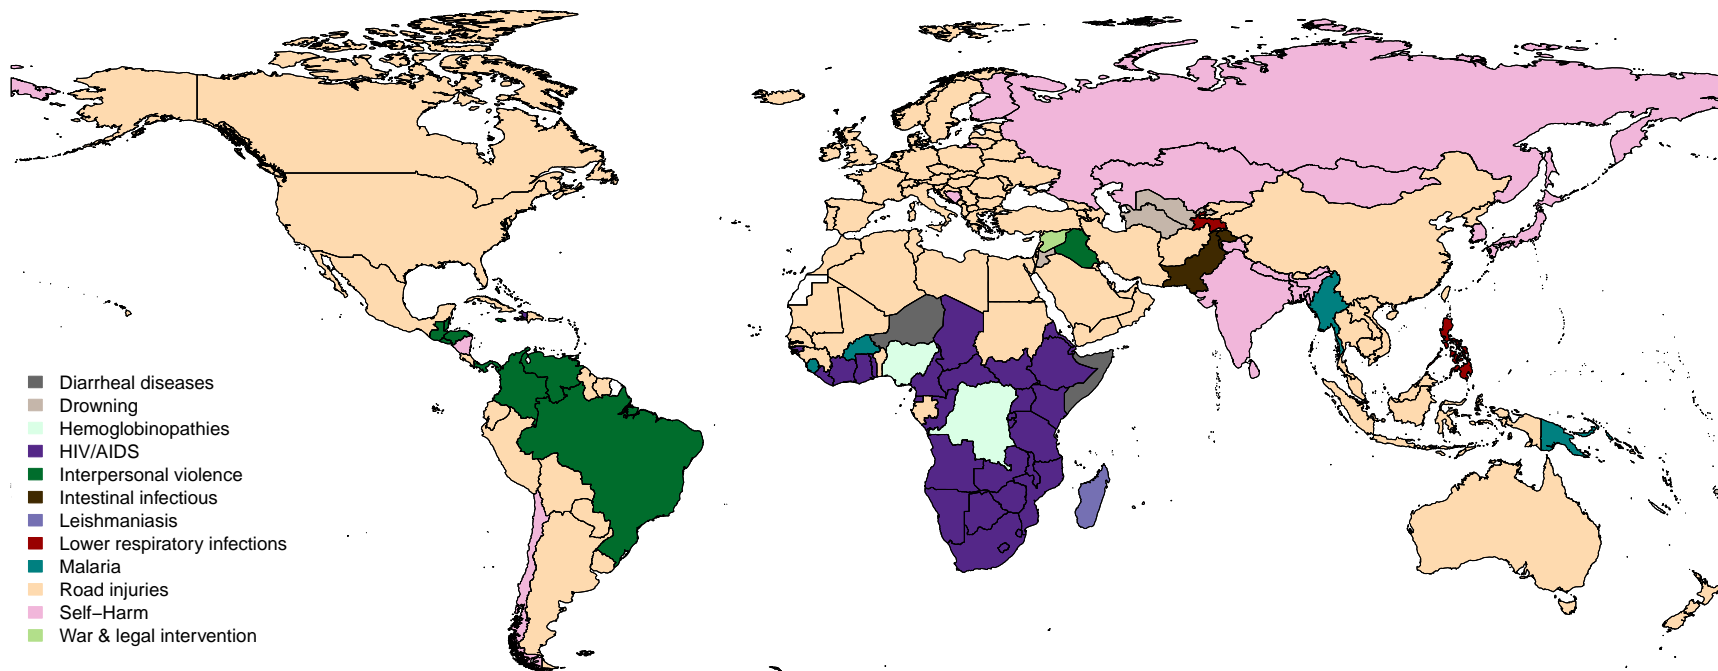

- Diarrheal diseases
- Drowning
- Hemoglobinopathies
- HIV/AIDS
- Interpersonal violence
- Intestinal infectious
- Leishmaniasis
- Lower respiratory infections
- Malaria
- Road injuries
- Self-Harm
- War & legal intervention

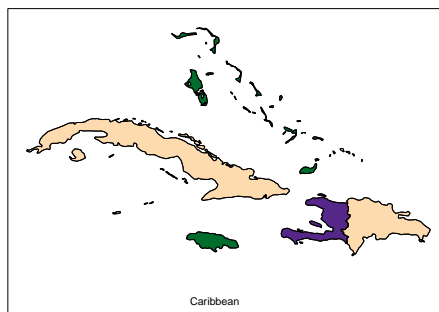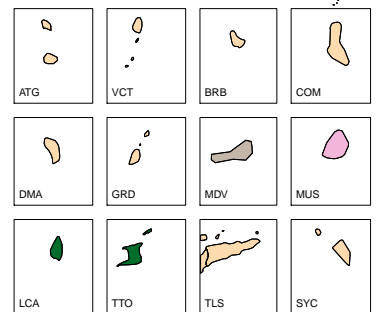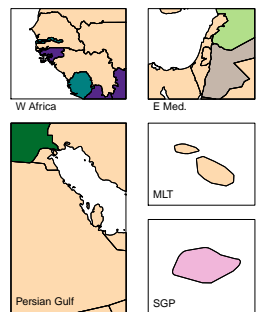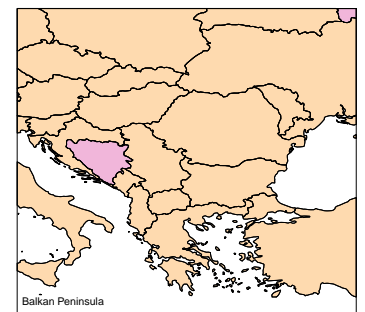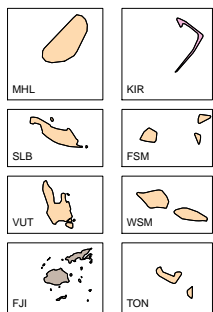

eFigure 7. DALY rate (per 100,000), ages<5, 2013

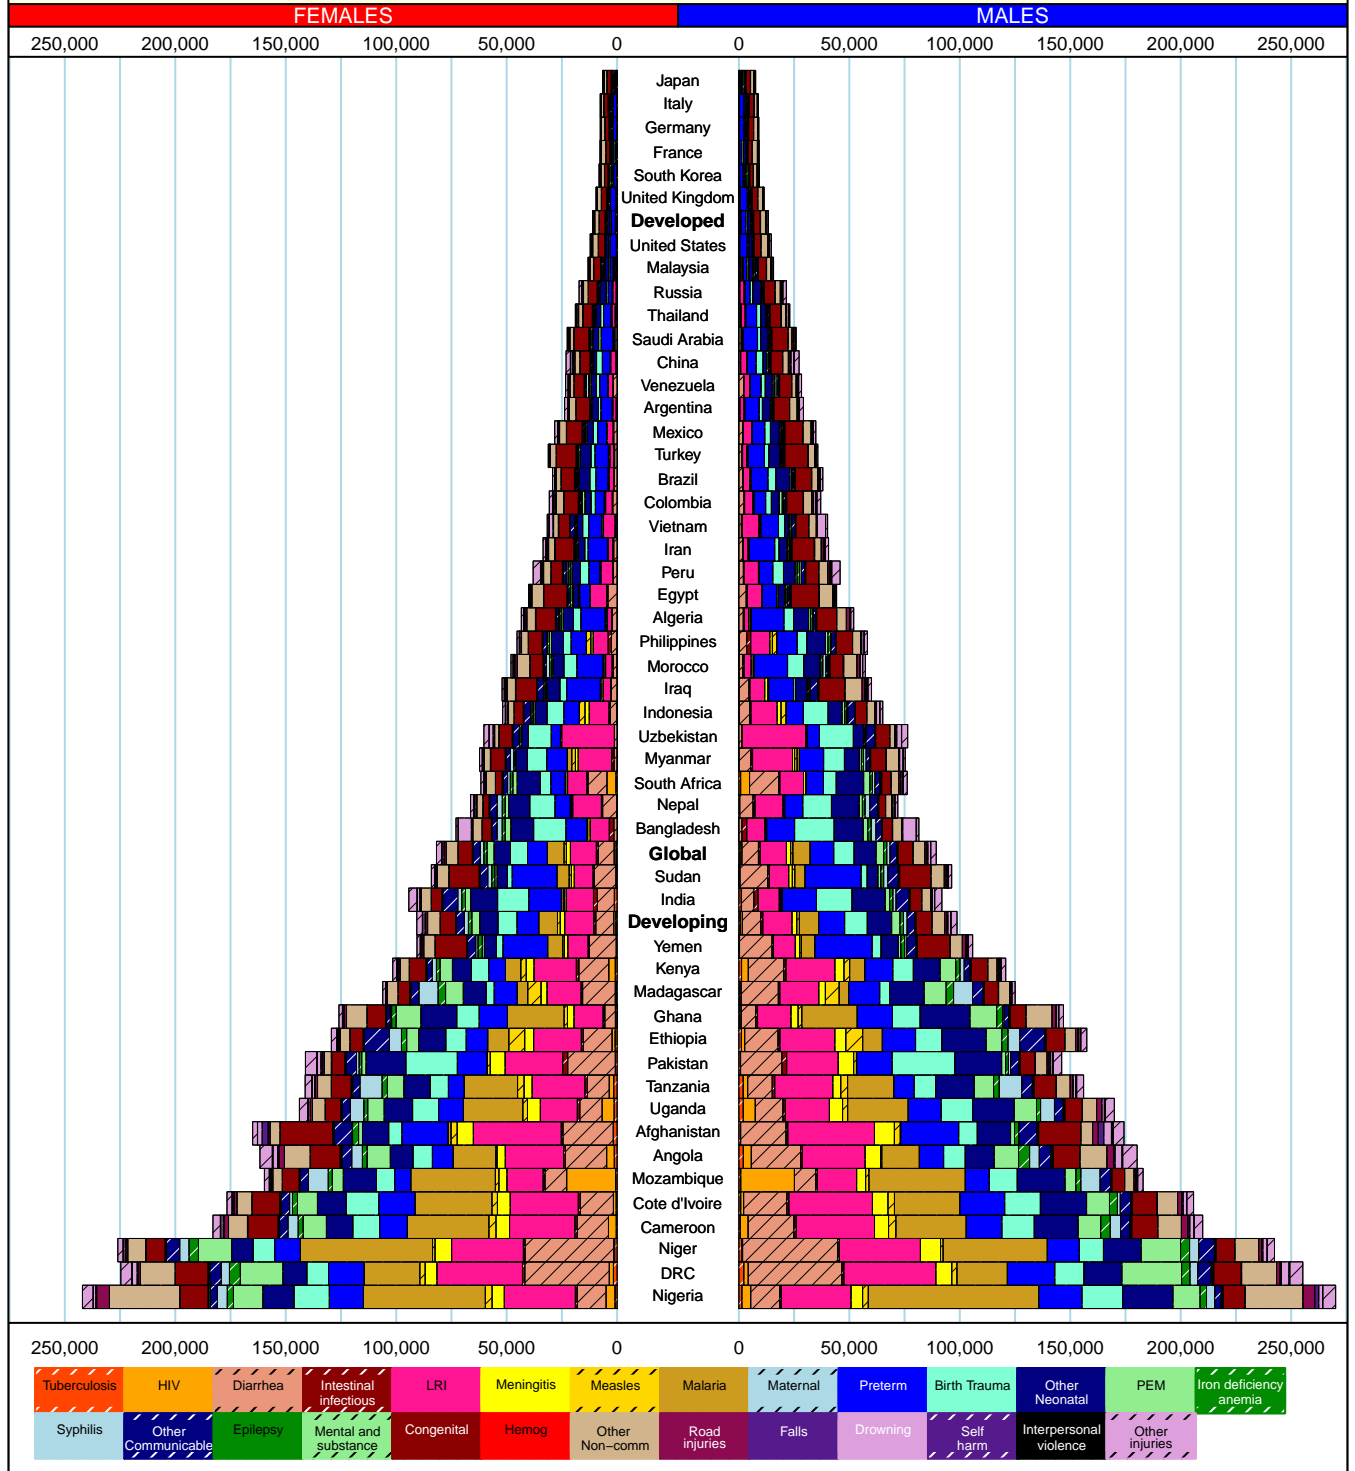

eFigure 8. DALY rate (per 100,000), ages 5–9, 2013

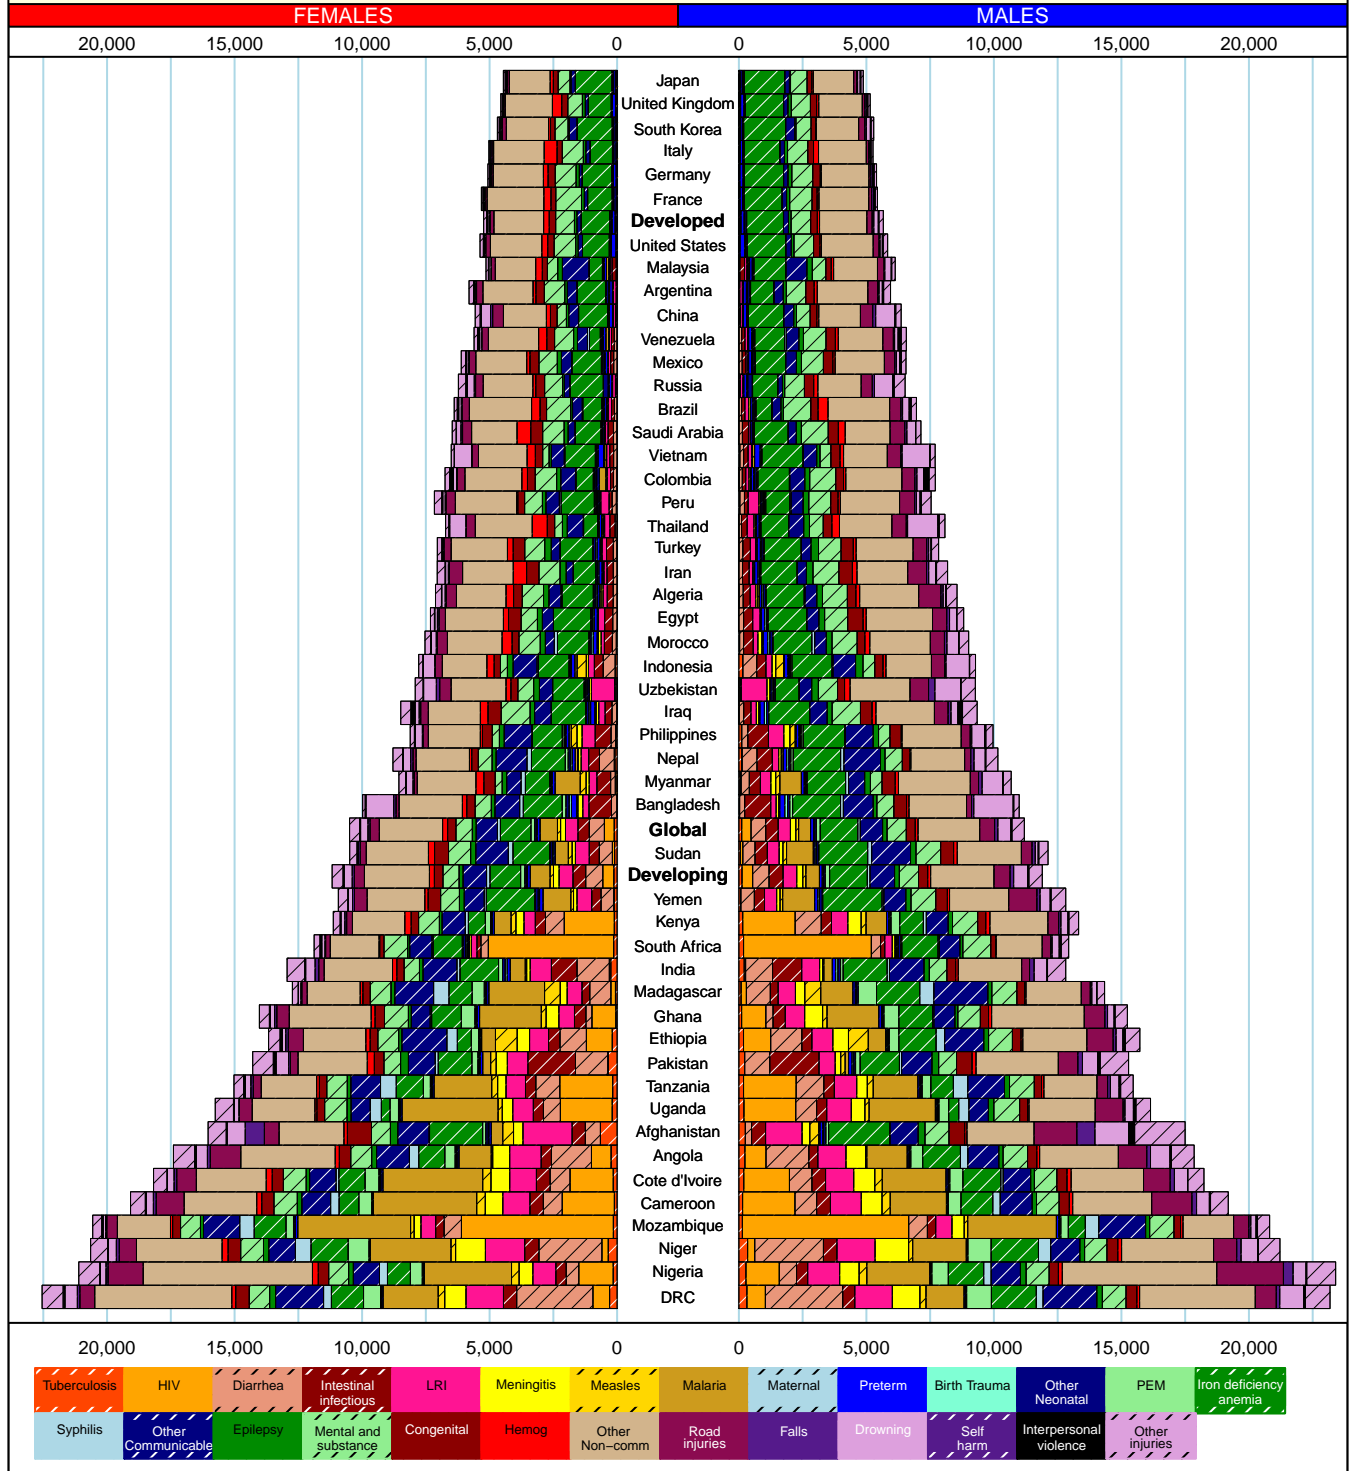

eFigure 9. Age-standardized DALY rate (per 100,000), ages 10–19, 2013

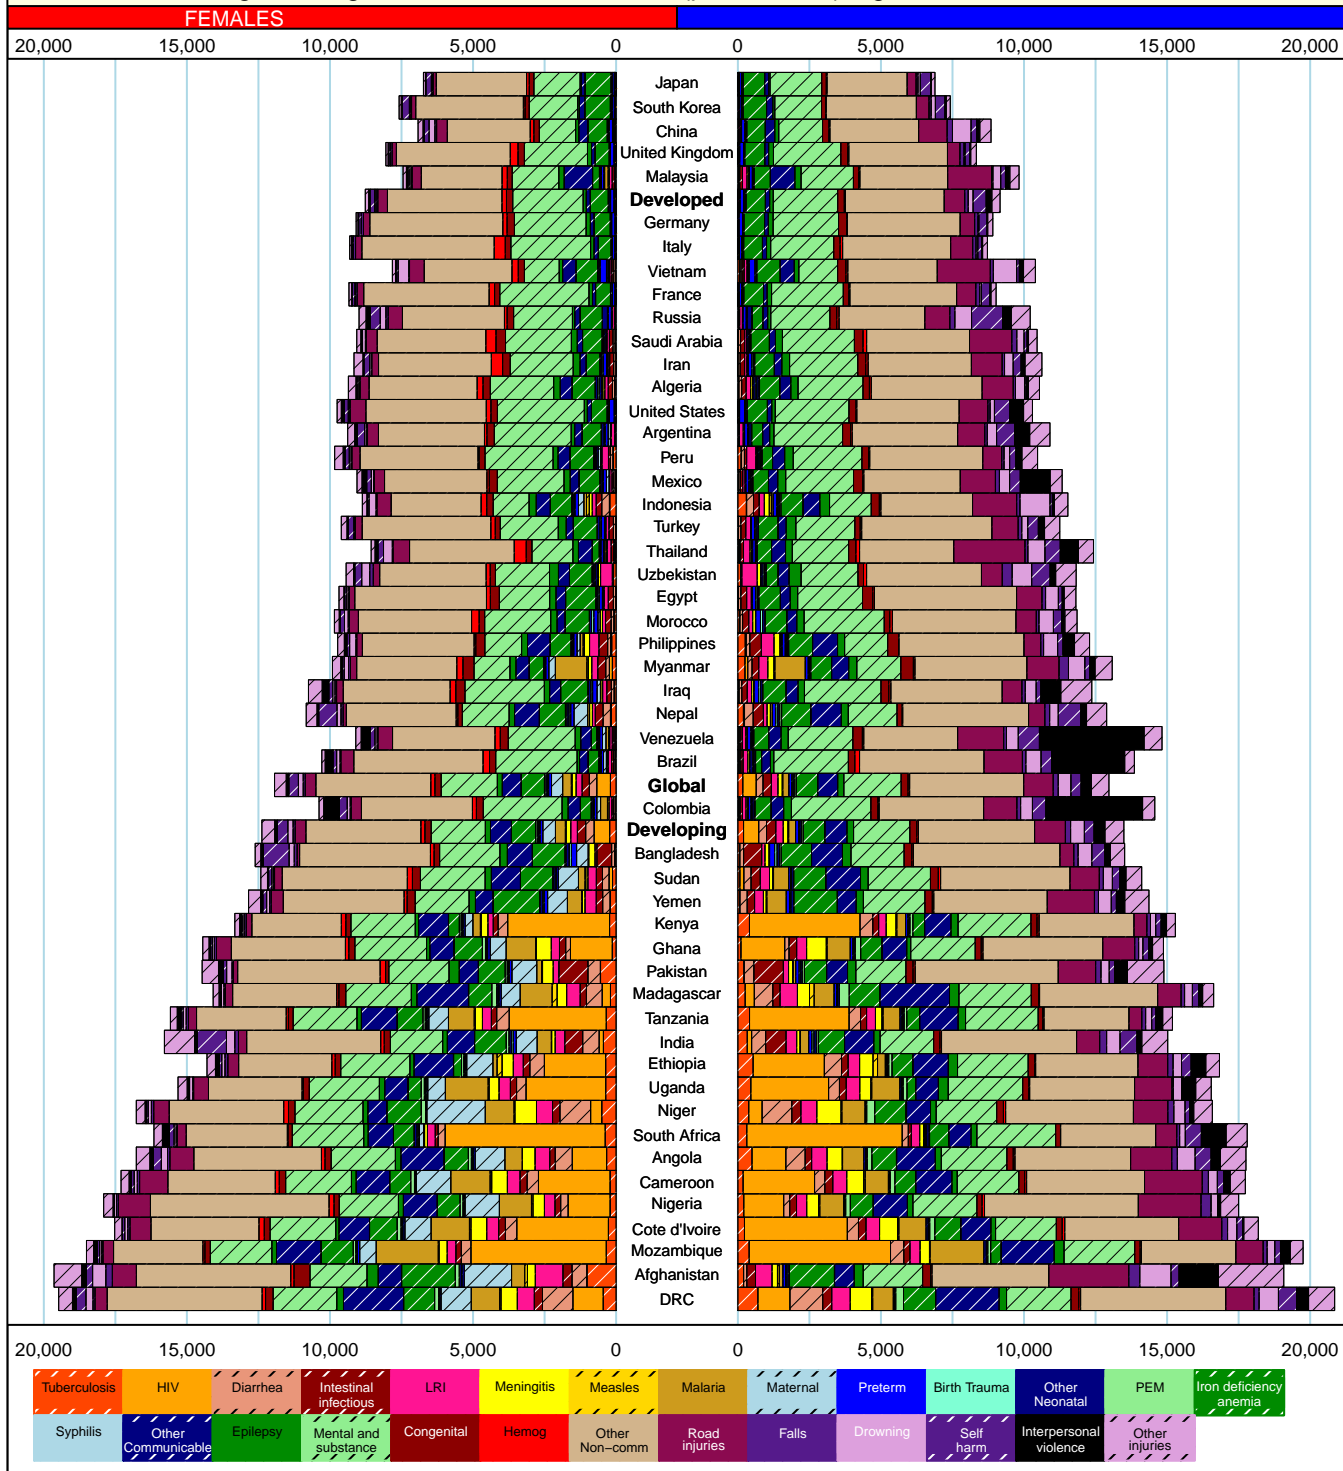

**eFigure 10. Top 25 Global Causes of DALYs, Ages 5 to 9, Both Sexes, 1990 and 2013**

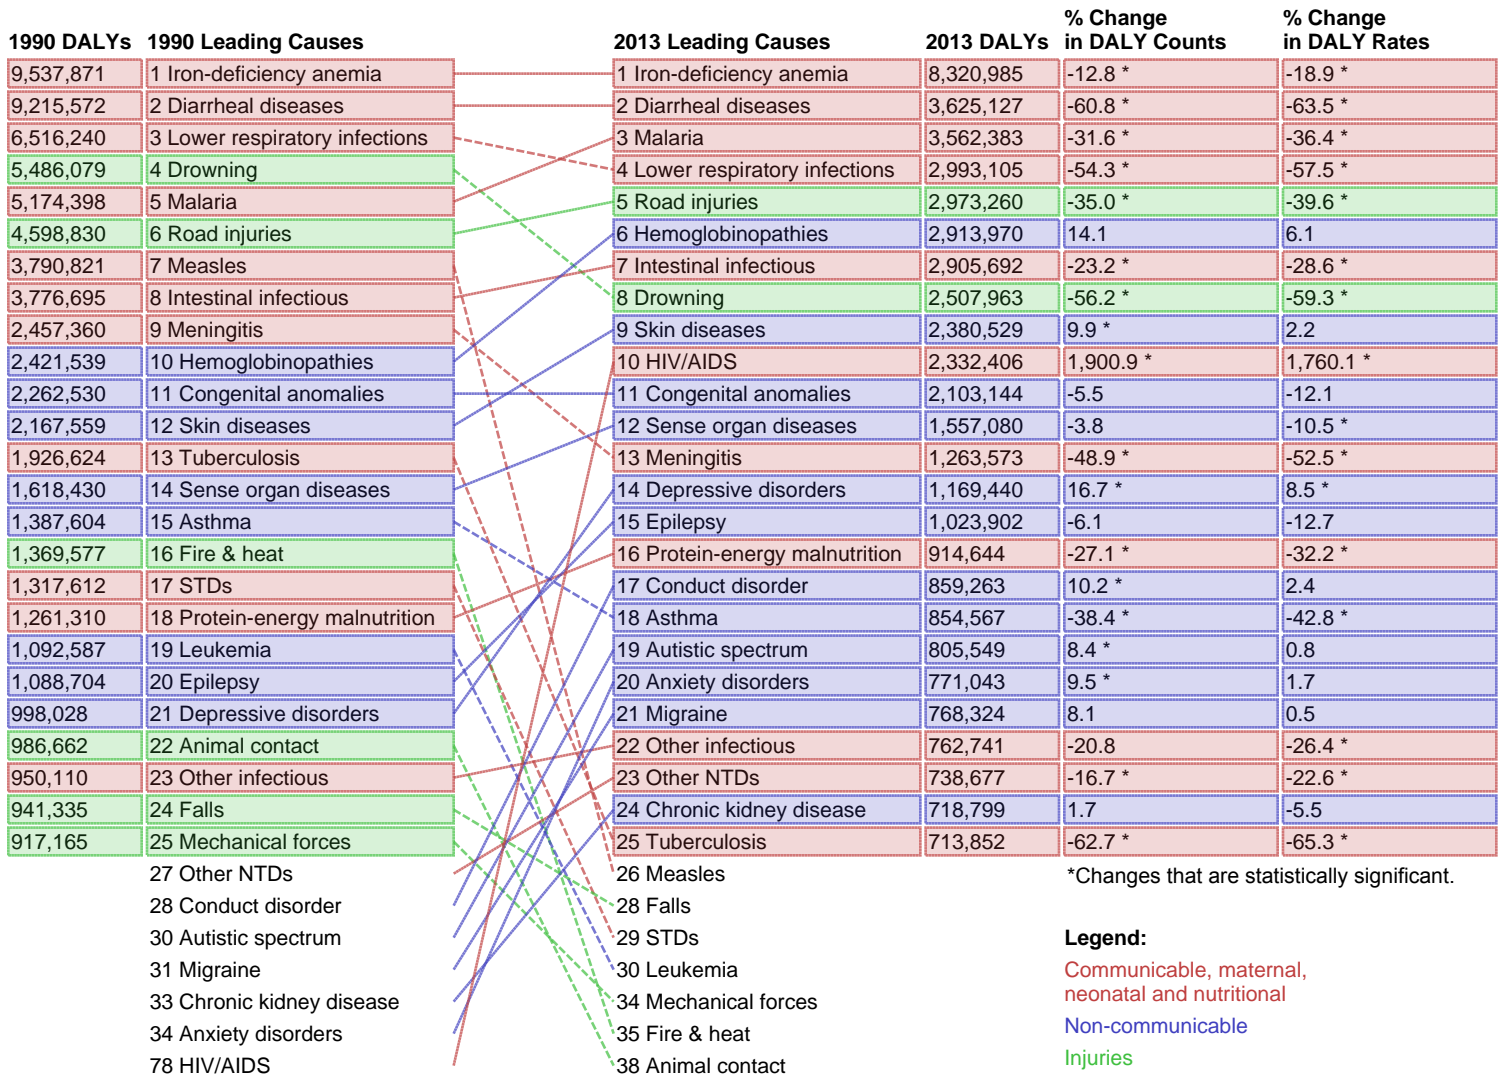

**eFigure 11. Top 25 Global Causes of DALYs, Ages 10 to 19, Both Sexes, 1990 and 2013**

| 1990 DALYs | 1990 Leading Causes             | 2013 Leading Causes             | 2013 DALYs | % Change in DALY Counts | % Change in DALY Rates |
|------------|---------------------------------|---------------------------------|------------|-------------------------|------------------------|
| 10,725,087 | 1 Iron-deficiency anemia        | 1 Iron-deficiency anemia        | 9,228,221  | -14.0 *                 | -24.2 *                |
| 9,705,552  | 2 Road injuries                 | 2 Skin diseases                 | 8,771,756  | 16.0 *                  | 1.8                    |
| 7,553,369  | 3 Skin diseases                 | 3 Road injuries                 | 8,519,226  | -12.2 *                 | -23.2 *                |
| 6,041,033  | 4 Depressive disorders          | 4 Depressive disorders          | 7,482,789  | 23.6 *                  | 8.4 *                  |
| 5,896,750  | 5 Drowning                      | 5 Low back & neck pain          | 6,084,457  | 13.4 *                  | -0.7                   |
| 5,742,550  | 6 Diarrheal diseases            | 6 HIV/AIDS                      | 5,610,628  | 2,963.0 *               | 2,608.2 *              |
| 5,358,595  | 7 Low back & neck pain          | 7 Conduct disorder              | 4,881,825  | 16.7 *                  | 2.5 *                  |
| 4,868,310  | 8 Self-harm                     | 8 Anxiety disorders             | 4,314,781  | 17.5 *                  | 3.1                    |
| 4,332,367  | 9 Tuberculosis                  | 9 Self-harm                     | 4,138,339  | -15.5                   | -26.1 *                |
| 4,183,707  | 10 Conduct disorder             | 10 Migraine                     | 4,009,141  | 18.1 *                  | 3.6                    |
| 4,153,137  | 11 Lower respiratory infections | 11 Drowning                     | 3,680,581  | -39.7                   | -47.1 *                |
| 3,926,332  | 12 Malaria                      | 12 Intestinal infectious        | 3,220,920  | -17.6                   | -27.6 *                |
| 3,909,264  | 13 Intestinal infectious        | 13 Hemoglobinopathies           | 3,145,736  | 15.1 *                  | 1.3                    |
| 3,691,531  | 14 Maternal disorders           | 14 Malaria                      | 3,031,564  | -23.5 *                 | -32.8 *                |
| 3,680,915  | 15 Anxiety disorders            | 15 Diarrheal diseases           | 2,955,297  | -48.7 *                 | -54.9 *                |
| 3,401,890  | 16 Migraine                     | 16 Asthma                       | 2,883,059  | -7.9 *                  | -19.1 *                |
| 3,125,931  | 17 Asthma                       | 17 Sense organ diseases         | 2,845,357  | 2.1                     | -10.3 *                |
| 2,890,287  | 18 Interpersonal violence       | 18 Congenital anomalies         | 2,746,453  | 8.5                     | -4.6                   |
| 2,786,736  | 19 Sense organ diseases         | 19 Interpersonal violence       | 2,729,044  | -5.6                    | -17.6 *                |
| 2,629,200  | 20 Hemoglobinopathies           | 20 Lower respiratory infections | 2,627,011  | -36.9 *                 | -44.6 *                |
| 2,584,115  | 21 Meningitis                   | 21 Epilepsy                     | 2,310,397  | 1.4                     | -11.0 *                |
| 2,538,835  | 22 Congenital anomalies         | 22 Maternal disorders           | 2,265,925  | -38.4 *                 | -46.2 *                |
| 2,532,576  | 23 Intestinal nematode          | 23 Tuberculosis                 | 2,234,493  | -48.3 *                 | -54.7 *                |
| 2,290,025  | 24 Fire & heat                  | 24 Meningitis                   | 1,729,544  | -33.2 *                 | -41.4 *                |
| 2,275,557  | 25 Epilepsy                     | 25 Autistic spectrum            | 1,636,909  | 14.9 *                  | 0.9                    |
|            | 31 Autistic spectrum            | 32 Fire & heat                  |            |                         |                        |
|            | 101 HIV/AIDS                    | 43 Intestinal nematode          |            |                         |                        |

\*Changes that are statistically significant.

**Legend:**

- Communicable, maternal, neonatal and nutritional
- Non-communicable
- Injuries



















|                      |                   |               |               |  |  |             |  |               |  |             |  |             |  |              |  |                |  |             |  |                |  |             |  |               |  |             |    |             |  |            |  |            |  |            |  |           |
|----------------------|-------------------|---------------|---------------|--|--|-------------|--|---------------|--|-------------|--|-------------|--|--------------|--|----------------|--|-------------|--|----------------|--|-------------|--|---------------|--|-------------|----|-------------|--|------------|--|------------|--|------------|--|-----------|
|                      | 3,220             | 90.7          | 197           |  |  | 0.3         |  | 329           |  | 6.5         |  | 112         |  | 3.7          |  | 59             |  | 1.6         |  | 26.1           |  | 117         |  | 3.2           |  | 7           |    | 0.0         |  | 59         |  | 0.5        |  |            |  |           |
|                      | (1329-1844)       | (85.3-96.2)   | (101-272)     |  |  | (5.5-7.2)   |  | (203-345)     |  | (10.7-20.4) |  | (27-100)    |  | (0.7-3.0)    |  | (57-137)       |  | (17.1-72.4) |  | (0.7-15.3)     |  | (17-61)     |  | (5.1-25.2)    |  | (1-11)      |    | (15-70)     |  | (0.3-0.8)  |  |            |  |            |  |           |
| <b>Guatemala</b>     | 3,848             | 143.5         | 424           |  |  | 16.0        |  | 43            |  | 1.6         |  | 92          |  | 3.4          |  | 113            |  | 4.2         |  | 1.4            |  | 215         |  | 79            |  | 200         |    | 7.4         |  | 396        |  | 34.5       |  |            |  |           |
|                      | (3,848-4,826)     | (122.2-157.4) | (161-572)     |  |  | (11.1-21.7) |  | (73-153)      |  | (0.8-2.7)   |  | (31-55)     |  | (1.0-5.0)    |  | (20-57)        |  | (8.0-22.0)  |  | (4.0-7.5)      |  | (104-121)   |  | (51-114.4)    |  | (120-200)   |    | (14.6-11.3) |  | (222-399)  |  | (0.0-24.0) |  | (0.2-18)   |  | (1.5-6.8) |
| <b>Guinea-Bissau</b> | 683               | 26.7          | 179           |  |  | 6.5         |  | 24            |  | 0.9         |  | 14          |  | 0.5          |  | 11             |  | 0.7         |  | 0.6            |  | 4           |  | 7             |  | 6           |    | 0.1         |  | 8          |  | 0.7        |  |            |  |           |
|                      | (633-872)         | (150.5-228.1) | (75-142)      |  |  | (20.0-37.6) |  | (34-191)      |  | (23.0-49.5) |  | (4-13)      |  | (1.0-3.6)    |  | (0-14)         |  | (2.4-7.8)   |  | (0-2)          |  | (14-4.7)    |  | (77-60.1)     |  | (70-15.5)   |    | (17-55)     |  | (4.3-14.1) |  | (16-89)    |  | (4.0-22.9) |  | (1.5-3)   |
| <b>Guinea</b>        | 177               | 21.5          | 55            |  |  | 7.8         |  | 4             |  | 0.3         |  | 1           |  | 0.1          |  | 2              |  | 0.1         |  | 0.1            |  | 1           |  | 1             |  | 1           |    | 0.0         |  | 0.3        |  | 0.7        |  |            |  |           |
|                      | (79-123.5)        | (17-32)       | (17-32)       |  |  | (8.0-18.6)  |  | (2-7)         |  | (13.4-44)   |  | (0-19)      |  | (4.3-10.9)   |  | (0-22)         |  | (0.5-2.1)   |  | (1-7)          |  | (5.5-15.0)  |  | (4-8)         |  | (23-46)     |    | (1-2)       |  | (0.4-0.9)  |  | (0-1)      |  | (0.1-0.6)  |  | (0-1)     |
| <b>Haiti</b>         | 2,362             | 85.7          | 634           |  |  | 22.4        |  | 49            |  | 2.2         |  | 44          |  | 2.0          |  | 32             |  | 2.6         |  | 2.2            |  | 101         |  | 32            |  | 22          |    | 3.1         |  | 33         |  | 2.7        |  |            |  |           |
|                      | (2,107-2,526)     | (81.5-111.0)  | (109-204)     |  |  | (14.8-0.0)  |  | (29-78)       |  | (0.7-25.8)  |  | (29-78)     |  | (1.1-13.2)   |  | (25-71)        |  | (1.4-48)    |  | (10-174)       |  | (70-145)    |  | (71-145)      |  | (11.8-5.3)  |    | (18-69)     |  | (10.8-1.3) |  | (43-87)    |  | (1.1-1.8)  |  |           |
| <b>Honduras</b>      | 1,586             | 65.8          | 32            |  |  | 4.5         |  | 32            |  | 1.8         |  | 22          |  | 4.0          |  | 29             |  | 2.6         |  | 2.2            |  | 82          |  | 267           |  | 22          |    | 1.5         |  | 2          |  | 0.1        |  |            |  |           |
|                      | (992-1,420)       | (32.0-136.3)  | (15-75)       |  |  | (10.0-14.0) |  | (8.0-49.0)    |  | (0.7-29.3)  |  | (0.7-34.0)  |  | (0.2-7.0)    |  | (12.1-57.0)    |  | (0.2-40.2)  |  | (1.8-17.0)     |  | (12.1-57.0) |  | (0.2-40.2)    |  | (13.1-57.0) |    | (0.2-10.3)  |  | (0.2-10.3) |  | (0.2-10.3) |  | (0.2-10.3) |  |           |
| <b>Hungary</b>       | 228               | 21.0          | 42            |  |  | 1.8         |  | 0             |  | 0.0         |  | 35          |  | 1.4          |  | 2              |  | 0.2         |  | 0.4            |  | 4           |  | 4             |  | 0           |    | 0.0         |  | 0          |  | 0.0        |  |            |  |           |
|                      | (117-339)         | (10.0-29.2)   | (14-30)       |  |  | (0.0-0.0)   |  | (21-43)       |  | (0.0-0.0)   |  | (11-23)     |  | (1.0-2.3)    |  | (11-23)        |  | (0.0-0.0)   |  | (1.0-2.3)      |  | (11-23)     |  | (0.0-0.0)     |  | (0.0-0.0)   |    | (0.0-0.0)   |  | (0.0-0.0)  |  | (0.0-0.0)  |  | (0.0-0.0)  |  |           |
| <b>Iceland</b>       | 7                 | 16.5          | 2             |  |  | 4.0         |  | 0             |  | 0.0         |  | 2           |  | 0.8          |  | 0              |  | 0.0         |  | 0.0            |  | 0           |  | 0             |  | 0           |    | 0.0         |  | 0          |  | 0.0        |  |            |  |           |
|                      | (6-19)            | (0.0-19.2)    | (1-3)         |  |  | (2.5-55)    |  | (0-0)         |  | (0.0-0.0)   |  | (1-2)       |  | (2.0-53)     |  | (0-0)          |  | (0.0-0.0)   |  | (0-1)          |  | (0.0-0.0)   |  | (0-0)         |  | (0-0)       |    | (0.0-0.0)   |  | (0-0)      |  | (0.0-0.0)  |  | (0.0-0.0)  |  |           |
| <b>India</b>         | 245,074           | 308,273       | 1,302         |  |  | 12,426      |  | 17,510        |  | 1,000       |  | 1,341       |  | 1.8          |  | 22,074         |  | 1,192       |  | 1.8            |  | 1,192       |  | 1,192         |  | 1,192       |    | 1,192       |  | 1,192      |  | 1,192      |  | 1,192      |  |           |
|                      | (245,074-308,273) | (102.2-128.4) | (1,302-2,044) |  |  | (4.5-94.6)  |  | (15.76-7.04)  |  | (1.1-2.9)   |  | (70-18.7)   |  | (0.54-8.24)  |  | (11.90-20,210) |  | (172-1.6)   |  | (11.90-20,210) |  | (172-1.6)   |  | (2,462-6,307) |  | (0.0-0.0)   |    | (0.0-0.0)   |  | (0.0-0.0)  |  | (0.0-0.0)  |  | (0.0-0.0)  |  |           |
| <b>Indonesia</b>     | 26,538            | 32,841        | 86.6          |  |  | 71.4        |  | 2,907         |  | 0.6         |  | 14.8        |  | 0.4          |  | 12.8           |  | 0.3         |  | 0.4            |  | 1,345       |  | 1,345         |  | 1,345       |    | 1,345       |  | 1,345      |  | 1,345      |  | 1,345      |  |           |
|                      | (26,538-32,841)   | (86.6-71.4)   | (4,963-9,767) |  |  | (11.1-17.9) |  | (5-261)       |  | (0.0-0.0)   |  | (298-689)   |  | (0.6-14.0)   |  | (2,907-6,760)  |  | (0.4-12.8)  |  | (0.4-12.8)     |  | (0.4-12.8)  |  | (0.4-12.8)    |  | (0.4-12.8)  |    | (0.4-12.8)  |  | (0.4-12.8) |  | (0.4-12.8) |  | (0.4-12.8) |  |           |
| <b>Iran</b>          | 4,008             | 6,250         | 145           |  |  | 44.7        |  | 2             |  | 0.0         |  | 20          |  | 1.2          |  | 20             |  | 1.2         |  | 1.2            |  | 111         |  | 111           |  | 111         |    | 111         |  | 111        |  | 111        |  | 111        |  |           |
|                      | (4,008-6,250)     | (145-44.7)    | (71-101)      |  |  | (0.0-2)     |  | (20-132)      |  | (0.0-2)     |  | (20-132)    |  | (1.7-4.9)    |  | (106-407)      |  | (0.9-3.6)   |  | (0.9-3.6)      |  | (0.9-3.6)   |  | (0.9-3.6)     |  | (0.9-3.6)   |    | (0.9-3.6)   |  | (0.9-3.6)  |  | (0.9-3.6)  |  | (0.9-3.6)  |  |           |
| <b>Iraq</b>          | 137               | 24.9          | 3             |  |  | 2.6         |  | 0             |  | 0.1         |  | 0           |  | 0.9          |  | 2              |  | 0.1         |  | 0.1            |  | 0           |  | 0             |  | 0           |    | 0.0         |  | 0          |  | 0.0        |  |            |  |           |
|                      | (121-155)         | (21.1-28.9)   | (4-38)        |  |  | (4.7-1.7)   |  | (0-10)        |  | (0.0-10)    |  | (18-36)     |  | (14.4-48)    |  | (0-2)          |  | (0.6-1.6)   |  | (0-2)          |  | (1.2-2)     |  | (0-0)         |  | (0-0)       |    | (0.0-0.0)   |  | (0-0)      |  | (0.0-0.0)  |  | (0.0-0.0)  |  |           |
| <b>Israel</b>        | 217               | 237           | 194           |  |  | 451         |  | 1             |  | 0.0         |  | 0           |  | 0.0          |  | 0              |  | 0.0         |  | 0.0            |  | 0           |  | 0             |  | 0           |    | 0.0         |  | 0          |  | 0.0        |  |            |  |           |
|                      | (217-237)         | (107-193)     | (80-188)      |  |  | (41.5-58.0) |  | (0-0)         |  | (0.0-0.0)   |  | (20-38)     |  | (17-30)      |  | (0-14)         |  | (0.4-12)    |  | (0-2)          |  | (0.4-12)    |  | (0-2)         |  | (0-2)       |    | (0.0-0.0)   |  | (0-1)      |  | (0.0-0.0)  |  | (0.0-0.0)  |  |           |
| <b>Italy</b>         | 1,149             | 1,230         | 177           |  |  | 20.9        |  | 22            |  | 0.6         |  | 94          |  | 0.5          |  | 20             |  | 0.2         |  | 0.2            |  | 30          |  | 30            |  | 30          |    | 30          |  | 30         |  | 30         |  | 30         |  |           |
|                      | (1,149-1,230)     | (177-20.9)    | (152-146)     |  |  | (9.3-74)    |  | (2-6)         |  | (0.0-1)     |  | (6-58)      |  | (0.9-1.6)    |  | (1-43)         |  | (0.4-0.8)   |  | (1-23)         |  | (0-1.4)     |  | (1-31)        |  | (0.2-0.3)   |    | (1-1)       |  | (0.0-0.0)  |  | (0-0)      |  | (0.0-0.0)  |  |           |
| <b>Jamaica</b>       | 101               | 33            | 3             |  |  | 0.5         |  | 1             |  | 0.0         |  | 1           |  | 0.2          |  | 1              |  | 0.1         |  | 0.1            |  | 1           |  | 1             |  | 1           |    | 0.0         |  | 0          |  | 0.0        |  |            |  |           |
|                      | (101-33)          | (85.4-93.3)   | (13-31)       |  |  | (2.3-5.6)   |  | (1-1)         |  | (0.2-0.3)   |  | (6-16)      |  | (1.1-2.5)    |  | (7-16)         |  | (1.2-2.9)   |  | (1-7)          |  | (0.3-1.3)   |  | (1-3)         |  | (0.1-0.2)   |    | (1-2)       |  | (0.2-0.4)  |  | (0-1)      |  | (0.0-0.0)  |  |           |
| <b>Japan</b>         | 1,270             | 201           | 1,611         |  |  | 1,338       |  | 1,611         |  | 0.0         |  | 80          |  | 0            |  | 12             |  | 0.1         |  | 0.1            |  | 26          |  | 0.1           |  | 53          |    | 0           |  | 0.0        |  | 0.0        |  |            |  |           |
|                      | (1,270-201)       | (12.0-20.1)   | (1,611-1,611) |  |  | (12.0-20.1) |  | (12.0-20.1)   |  | (0.0-0.0)   |  | (12.0-20.1) |  | (0.0-0.0)    |  | (0.0-1.0)      |  | (0.0-0.0)   |  | (4.0-20)       |  | (0.0-0.0)   |  | (4.0-20)      |  | (0.0-0.0)   |    | (4.0-20)    |  | (0.0-0.0)  |  | (1.7-37)   |  | (0.0-0.0)  |  |           |
| <b>Jordan</b>        | 556               | 39            | 65            |  |  | 4.6         |  | 0             |  | 0.0         |  | 10          |  | 5.2          |  | 26             |  | 1.9         |  | 1.9            |  | 2           |  | 2             |  | 1           |    | 0.1         |  | 0          |  | 0.0        |  |            |  |           |
|                      | (477-633)         | (10.0-48.8)   | (44-94)       |  |  | (1.0-48.8)  |  | (0-1)         |  | (0.0-0.0)   |  | (10-54)     |  | (0.7-13.0)   |  | (17-59.0)      |  | (0.8-15.6)  |  | (17-59.0)      |  | (0.8-15.6)  |  | (17-59.0)     |  | (0.8-15.6)  |    | (17-59.0)   |  | (0.8-15.6) |  | (0.8-15.6) |  | (0.8-15.6) |  |           |
| <b>Kazakhstan</b>    | 1,033             | 1,024         | 68.3          |  |  | 79.4        |  | 128           |  | 0.5         |  | 14.0        |  | 0.0          |  | 11             |  | 0.1         |  | 0.1            |  | 114         |  | 114           |  | 114         |    | 114         |  | 114        |  | 114        |  | 114        |  |           |
|                      | (1,033-1,024)     | (68.3-79.4)   | (128-309)     |  |  | (15.1-14.0) |  | (2-13)        |  | (0.1-0.1)   |  | (284-534)   |  | (117.2-10.0) |  | (140-267)      |  | (0.9-11.2)  |  | (1-6)          |  | (0.1-0.1)   |  | (14-192)      |  | (1.0-7.8)   |    | (47-80)     |  | (2.0-1.4)  |  | (2-1)      |  | (0.1-0.1)  |  |           |
| <b>Kenya</b>         | 8,593             | 10,919        | 914           |  |  | 133.5       |  | 279           |  | 2.8         |  | 1,869       |  | 6,099        |  | 394            |  | 2.6         |  | 2.6            |  | 382         |  | 382           |  | 382         |    | 382         |  | 382        |  | 382        |  | 382        |  |           |
|                      | (8,593-10,919)    | (914-133.5)   | (279-598)     |  |  | (29.8-58.8) |  | (1,869-6,099) |  | (99-238)    |  | (394-62.0)  |  | (99-238)     |  | (133-258)      |  | (133-258)   |  | (133-258)      |  | (133-258)   |  | (100-287)     |  | (1.1-2.9)   |    | (231-482)   |  | (2.1-46)   |  | (287-698)  |  | (287-698)  |  |           |
| <b>Kiribati</b>      | 120               | 13            | 2             |  |  | 0.1         |  | 1             |  | 0.0         |  | 1           |  | 0.1          |  | 1              |  | 0.1         |  | 0.1            |  | 1           |  | 1             |  | 1           |    | 0.0         |  | 0          |  | 0.0        |  |            |  |           |
|                      | (120-13)          | (0.0-14.2)    | (1-3)         |  |  | (8.8-12.9)  |  | (0-1)         |  | (0.0-0.1)   |  | (2-4)       |  | (7.1-12)     |  | (0-1)          |  | (1.8-4.5)   |  | (0-1)          |  | (0.4-1.0)   |  | (0-1)         |  | (0.4-1.0)   |    | (0-1)       |  | (1.9-4.5)  |  | (0-1)      |  | (1.7-1.4)  |  |           |
| <b>Kuwait</b>        | 120               | 14            | 2             |  |  | 0.1         |  | 1             |  | 0.0         |  | 1           |  | 0.1          |  | 1              |  | 0.1         |  | 0.1            |  | 1           |  | 1             |  | 1           |    | 0.0         |  | 0          |  | 0.0        |  |            |  |           |
|                      | (120-14)          | (0.1-28.5)    | (18-40)       |  |  | (0.0-10.1)  |  | (0-1)         |  | (0.0-0.1)   |  | (1-3)       |  | (0.8-6.4)    |  | (2-5)          |  | (0.4-1.1)   |  | (1-7)          |  | (0.6-0.5)   |  | (2-5)         |  | (1-5)       |    | (0.0-0.0)   |  | (0-0)      |  | (0.0-0.0)  |  | (0.0-0.0)  |  |           |
| <b>Kyrgyzstan</b>    | 166               | 550           | 145           |  |  | 70.3        |  | 3             |  | 0.0         |  | 1           |  | 0.1          |  | 1              |  | 0.1         |  | 0.1            |  | 1           |  | 1             |  | 1           |    | 0.0         |  | 0          |  | 0.0        |  |            |  |           |
|                      | (166-550)         | (145-70.3)    | (41-30)       |  |  | (4.3-3.8)   |  | (0-1)         |  | (0.0-0.0)   |  | (4.3-3.8)   |  | (1.0-3.0)    |  | (1.0-3.0)      |  | (1.0-3.0)   |  | (1.0-3.0)      |  | (1.0-3.0)   |  | (1.0-3.0)     |  | (1.0-3.0)   |    | (1.0-3.0)   |  | (1.0-3.0)  |  | (1.0-3.0)  |  | (1.0-3.0)  |  |           |
| <b>Laos</b>          | 5,541             | 99.2          | 288           |  |  | 17.1        |  | 110           |  | 0.4         |  | 130         |  | 8.5          |  | 44             |  | 2.7         |  | 2.7            |  | 107         |  | 107           |  | 107         |    | 107         |  | 107        |  | 107        |  | 107        |  |           |
|                      | (1,106-1,990)     | (17.2-30.3)   | (11-22)       |  |  | (11.0-24.4) |  | (31-24)       |  | (0.2-0.5)   |  | (169-433)   |  | (87-432)     |  | (45.9-25.5)    |  | (48-77)     |  | (12-53)        |  | (12-53)     |  | (12-53)       |  | (12-53)     |    | (12-53)     |  | (12-53)    |  | (12-53)    |  | (12-53)    |  |           |
| <b>Latvia</b>        | 180               | 34            | 1             |  |  | 31.1        |  | 0             |  | 0.1         |  | 0           |  | 0.2          |  | 0              |  | 0.2         |  | 0.2            |  | 0           |  | 0             |  | 0           |    | 0.0         |  | 0          |  | 0.0        |  |            |  |           |
|                      | (180-34)          | (31.6-34.7)   | (0-14)        |  |  | (6.7-4.7)   |  | (0-0)         |  | (0.0-0.2)   |  | (0-10)      |  | (27-5.6)     |  | (0-18)         |  | (1.4-2.9)   |  | (0-1)          |  | (0.1-0.5)   |  | (0-3)         |  | (0.4-0.9)   |    | (0-0)       |  | (0.0-0.0)  |  | (0-0)      |  | (0.0-0.0)  |  |           |
| <b>Lebanon</b>       | 326               | 460           | 22            |  |  | 58          |  | 2             |  | 0.0         |  | 1           |  | 0.2          |  | 1              |  | 0.2         |  | 0.2            |  | 1           |  | 1             |  | 1           | </ |             |  |            |  |            |  |            |  |           |



Table 4. Number of Deaths and Age-standardized Rates (per 100,000) with 95% Uncertainty Intervals for the 10 Global Causes of Death in 188 Countries, April 0 to 15, 2021

Table with columns: Location, Counts, Rates, and 10 categories of causes of death: Respiratory Infections, Maternal, Neonatal Encephalopathy, Perinatal Brain Complications, Dermal Diseases, Congenital Anomalies, Nonfatal Septic, Other Neonatal, Protein-Energy Malnutrition, and Road Injuries. Each cell contains counts and rates with 95% uncertainty intervals.



|                                  |                   |               |                |              |               |              |                |              |               |                |               |                |               |             |               |             |               |               |             |             |             |             |            |
|----------------------------------|-------------------|---------------|----------------|--------------|---------------|--------------|----------------|--------------|---------------|----------------|---------------|----------------|---------------|-------------|---------------|-------------|---------------|---------------|-------------|-------------|-------------|-------------|------------|
| Poland                           | (13,447-3,884)    | 427           | 118            | 1.5          | 558           | 7.1          | 0              | 0.0          | 125           | 1.6            | 9             | 0.1            | 801           | 10.5        | 113           | 1.5         | 93            | 1.2           | 1           | 0.0         | 394         | 4.2         |            |
|                                  | (10,172) (10,172) | (81-1,645)    | (81-1,729)     | (0-0)        | (10-23)       | (10-118)     | (0-0)          | (0-0)        | (0-15)        | (0-14)         | (0-1)         | (0-1)          | (550-1,242)   | (59-233)    | (10-12)       | (0-1)       | (0-2)         | (0-1)         | (0-1)       | (0-0)       | (80-433)    | (0-15)      |            |
| Portugal                         | (592-700)         | (30.2-36.3)   | (20-23)        | 1.0          | 2.8           | 2.8          | 0              | 0.0          | 18            | 1.1            | 5             | 0.3            | (16-145)      | (6.5-4.1)   | (9-26)        | (0-1.5)     | (10-39)       | (0.6-2.3)     | (1-2)       | 0.0         | 0.1         | 0.6         |            |
|                                  | (592-700)         | (30.2-36.3)   | (20-23)        | (0-0)        | (0-0.0)       | (0-0.0)      | (0-0)          | (0-0.0)      | (12-34)       | (0.7-1.4)      | (4-7)         | (0-0.4)        | (98-145)      | (5.5-4.1)   | (9-26)        | (0-1.5)     | (10-39)       | (0.6-2.3)     | (1-2)       | (0-0.1)     | (80-109)    | (0-6.4)     |            |
| Romania                          | (860-334)         | (55.3-83.4)   | (5-8)          | (1.1-2.1)    | (54-82)       | (127-13.4)   | (9-0)          | (0.0)        | 5             | (1.2-2.8)      | (1-2)         | (0.2-0.5)      | (76-108)      | (18.4-26.6) | (0-1)         | (0.0-0.3)   | (4-12)        | (1.0-2.7)     | (0-0)       | (0.0-0.1)   | (26-37)     | (2.2-30.2)  |            |
|                                  | (860-334)         | (55.3-83.4)   | (5-8)          | (1.1-2.1)    | (54-82)       | (127-13.4)   | (9-0)          | (0.0)        | (0-1)         | (1.2-2.8)      | (1-2)         | (0.2-0.5)      | (76-108)      | (18.4-26.6) | (0-1)         | (0.0-0.3)   | (4-12)        | (1.0-2.7)     | (0-0)       | (0.0-0.1)   | (26-37)     | (2.2-30.2)  |            |
| Russia                           | (2,254-5,005)     | (62.5-120.8)  | (467-1,113)    | (10-112)     | (121-460)     | (0-0)        | (0-0)          | (0.0)        | 47            | (147-155)      | (21-68)       | (0.5-1.6)      | (186-1,052)   | (10.1-25.3) | (4-25)        | (0.0-1.0)   | (129-447)     | (1.1-10.9)    | (1-1)       | (0.0-0.1)   | (150-280)   | (0.3-4.3)   |            |
|                                  | (2,254-5,005)     | (62.5-120.8)  | (467-1,113)    | (10-112)     | (121-460)     | (0-0)        | (0-0)          | (0.0)        | (47)          | (147-155)      | (21-68)       | (0.5-1.6)      | (186-1,052)   | (10.1-25.3) | (4-25)        | (0.0-1.0)   | (129-447)     | (1.1-10.9)    | (1-1)       | (0.0-0.1)   | (150-280)   | (0.3-4.3)   |            |
| Russia                           | (24,697-24,697)   | (89.4-1,904)  | 8.2            | 1,857        | 3.9           | 5.9          | 0              | 0.0          | 993           | 3.2            | 208           | 0.7            | (5,078)       | (14.6-15.8) | (270)         | (0.6-0.8)   | (2,238)       | (7.5)         | (6.7)       | 0.2         | (862)       | (7.2)       |            |
|                                  | (24,697-24,697)   | (89.4-1,904)  | 8.2            | 1,857        | 3.9           | 5.9          | 0              | 0.0          | (993)         | (3.2)          | (208)         | (0.7)          | (5,078)       | (14.6-15.8) | (270)         | (0.6-0.8)   | (2,238)       | (7.5)         | (6.7)       | (0.2)       | (862)       | (7.2)       |            |
| Russia                           | (30,471-30,471)   | (63.2-140.8)  | (1,415-1,408)  | (14-18)      | (0-0)         | (0-0)        | (0-0)          | (0.0)        | (2,127-8,061) | (0.4-0.2)      | (137-9,600)   | (0.1-0.4)      | (1,415-1,408) | (14-18)     | (0-0)         | (0.0-0.3)   | (1,234-1,408) | (4.1-51.1)    | (0.1-18.3)  | (0-0)       | (54-279)    | (0.4-2.9)   |            |
|                                  | (30,471-30,471)   | (63.2-140.8)  | (1,415-1,408)  | (14-18)      | (0-0)         | (0-0)        | (0-0)          | (0.0)        | (2,127-8,061) | (0.4-0.2)      | (137-9,600)   | (0.1-0.4)      | (1,415-1,408) | (14-18)     | (0-0)         | (0.0-0.3)   | (1,234-1,408) | (4.1-51.1)    | (0.1-18.3)  | (0-0)       | (54-279)    | (0.4-2.9)   |            |
| Rwanda                           | (25,053-37,572)   | (151.1-120.0) | (2,309-4,630)  | (184-87.7)   | (1,338-2,577) | (18.0-48.0)  | (1,402-6,185)  | (20.7-48.0)  | 2,013         | 1,979          | 27.4          | 2,026          | (18.4-24.2)   | (10.1-38.4) | (131-47.2)    | (876-2,100) | (1.4-5.2)     | (138-1,403)   | (14.4-65.2) | (158-1,750) | (0.15-34.9) | (386-1,212) | (0.2-16.5) |
|                                  | (25,053-37,572)   | (151.1-120.0) | (2,309-4,630)  | (184-87.7)   | (1,338-2,577) | (18.0-48.0)  | (1,402-6,185)  | (20.7-48.0)  | 2,013         | 1,979          | 27.4          | 2,026          | (18.4-24.2)   | (10.1-38.4) | (131-47.2)    | (876-2,100) | (1.4-5.2)     | (138-1,403)   | (14.4-65.2) | (158-1,750) | (0.15-34.9) | (386-1,212) | (0.2-16.5) |
| Saint Lucia                      | (39-131)          | (86.0-24.0)   | (2-10)         | (4.5-18.8)   | (5-26)        | (26-46.5)    | (0-0)          | (0.0)        | (12-11)       | (2-11)         | (2-10)        | (0.3-0.3)      | (5-20)        | (90-7.4)    | (2-8)         | (2-0)       | (16-17.7)     | (1-6)         | (1-2)       | (1-1)       | (2-3)       | (2-2.7)     |            |
|                                  | (39-131)          | (86.0-24.0)   | (2-10)         | (4.5-18.8)   | (5-26)        | (26-46.5)    | (0-0)          | (0.0)        | (12-11)       | (2-11)         | (2-10)        | (0.3-0.3)      | (5-20)        | (90-7.4)    | (2-8)         | (2-0)       | (16-17.7)     | (1-6)         | (1-2)       | (1-1)       | (2-3)       | (2-2.7)     |            |
| Saint Vincent and the Grenadines | (12-104)          | (100.0-301.8) | (2-8)          | (6.0-21.0)   | (4-19)        | (11.7-37.7)  | (0-0)          | (0.0)        | (2-9)         | (3.2-3.8)      | (1-4)         | (1.3-1.5)      | (4-15)        | (10.7-41.1) | (1-4)         | (0-1)       | (5-10)        | (2.4-10.4)    | (1-4)       | (0-1)       | (2-1-10.4)  | (2-4)       | (4.1-8.4)  |
|                                  | (12-104)          | (100.0-301.8) | (2-8)          | (6.0-21.0)   | (4-19)        | (11.7-37.7)  | (0-0)          | (0.0)        | (2-9)         | (3.2-3.8)      | (1-4)         | (1.3-1.5)      | (4-15)        | (10.7-41.1) | (1-4)         | (0-1)       | (5-10)        | (2.4-10.4)    | (1-4)       | (0-1)       | (2-1-10.4)  | (2-4)       | (4.1-8.4)  |
| Samoa                            | (60-139)          | (95.7-149.9)  | (1-12)         | (1.4-11.2)   | (2-14)        | (0.0-15.4)   | (0-0)          | (0.0)        | (1-8)         | (1.4-11.2)     | (0-2)         | (1.3-1.3)      | (19-21.9)     | (1-9)       | (1.9)         | (15-9.9)    | (0.2-1.5)     | (1-2)         | (0-0)       | (0-1)       | (2-1-5)     | (0-1-5)     | (0.1-0.5)  |
|                                  | (60-139)          | (95.7-149.9)  | (1-12)         | (1.4-11.2)   | (2-14)        | (0.0-15.4)   | (0-0)          | (0.0)        | (1-8)         | (1.4-11.2)     | (0-2)         | (1.3-1.3)      | (19-21.9)     | (1-9)       | (1.9)         | (15-9.9)    | (0.2-1.5)     | (1-2)         | (0-0)       | (0-1)       | (2-1-5)     | (0-1-5)     | (0.1-0.5)  |
| Sao Tome and Principe            | (171-318)         | 276           | 4              | 33.1         | 27            | 22.7         | 57             | 48.0         | 25            | 25             | 16            | 2.6            | 11.5          | 21.1        | 16            | 21.6        | 6             | 4.8           | 3           | 11.3        | 4           | 4.9         |            |
|                                  | (171-318)         | 276           | 4              | 33.1         | 27            | 22.7         | 57             | 48.0         | 25            | 25             | 16            | 2.6            | 11.5          | 21.1        | 16            | 21.6        | 6             | 4.8           | 3           | 11.3        | 4           | 4.9         |            |
| Senegal                          | (218-11,465)      | (181-48.7)    | (15-15)        | (15-41)      | (11.2-34.2)   | (24-199)     | (24-199)       | (21.9-184.0) | (15-19)       | (17-20)        | (12.1-32.6)   | (0-0)          | (11-42)       | (16-21.8)   | (11-42)       | (11.7-31.0) | (11-10)       | (2.8-8.3)     | (1-12)      | (4.2-13)    | (11-7)      | (12.7-47)   |            |
|                                  | (218-11,465)      | (181-48.7)    | (15-15)        | (15-41)      | (11.2-34.2)   | (24-199)     | (24-199)       | (21.9-184.0) | (15-19)       | (17-20)        | (12.1-32.6)   | (0-0)          | (11-42)       | (16-21.8)   | (11-42)       | (11.7-31.0) | (11-10)       | (2.8-8.3)     | (1-12)      | (4.2-13)    | (11-7)      | (12.7-47)   |            |
| Serbia                           | (1,907-10,551)    | (783-1,019)   | (105-234)      | (15.1-2.4)   | (1,420-2,929) | (117-23.1)   | (1-9)          | (0.0)        | 294           | 54.0           | (89-122)      | (0.1)          | (2,052-2,801) | (19.6-26.6) | (466-1,116)   | (45-10.8)   | (146-130)     | (14-3-0)      | (9-20)      | (0.1-2.0)   | (835-1,169) | (84-11.7)   |            |
|                                  | (1,907-10,551)    | (783-1,019)   | (105-234)      | (15.1-2.4)   | (1,420-2,929) | (117-23.1)   | (1-9)          | (0.0)        | 294           | 54.0           | (89-122)      | (0.1)          | (2,052-2,801) | (19.6-26.6) | (466-1,116)   | (45-10.8)   | (146-130)     | (14-3-0)      | (9-20)      | (0.1-2.0)   | (835-1,169) | (84-11.7)   |            |
| Serbia                           | (13,747-40,742)   | (365.1-452.2) | (2,828-5,454)  | (17.8-54.2)  | (1,725-2,360) | (17.8-54.2)  | (2,881-9,316)  | (12.1-104.9) | (16.7-53.0)   | (16.7-53.0)    | (2,309-5,509) | (0.57-7.0)     | (1,082-3,658) | (18.1-39.1) | (1,491-4,307) | (15.4-44.0) | (143-1,458)   | (14.5-16.1)   | (894-2,424) | (10.1-26.1) | (600-1,088) | (0.4-11.7)  |            |
|                                  | (13,747-40,742)   | (365.1-452.2) | (2,828-5,454)  | (17.8-54.2)  | (1,725-2,360) | (17.8-54.2)  | (2,881-9,316)  | (12.1-104.9) | (16.7-53.0)   | (16.7-53.0)    | (2,309-5,509) | (0.57-7.0)     | (1,082-3,658) | (18.1-39.1) | (1,491-4,307) | (15.4-44.0) | (143-1,458)   | (14.5-16.1)   | (894-2,424) | (10.1-26.1) | (600-1,088) | (0.4-11.7)  |            |
| Sri Lanka                        | (896-441)         | (41.3-88.4)   | (21-35)        | (1.1-1.9)    | 348           | (0-0)        | 0.0            | (0.0)        | (0-0)         | (37-77)        | (0-0)         | (0.1-0.2)      | (9-118)       | (6-8.3)     | (0-1)         | (0.1-0.5)   | (21-43)       | (1.2-2.5)     | (0-1)       | (0.0-0.1)   | (74-101)    | (0-1)       |            |
|                                  | (896-441)         | (41.3-88.4)   | (21-35)        | (1.1-1.9)    | 348           | (0-0)        | 0.0            | (0.0)        | (0-0)         | (37-77)        | (0-0)         | (0.1-0.2)      | (9-118)       | (6-8.3)     | (0-1)         | (0.1-0.5)   | (21-43)       | (1.2-2.5)     | (0-1)       | (0.0-0.1)   | (74-101)    | (0-1)       |            |
| Seychelles                       | (24-31)           | (98.2-106.0)  | (4-5)          | (12.4-18.4)  | (2-1)         | (0.7-16.1)   | (0-0)          | (0.0)        | 0.4           | 0.4            | 4             | 0.4            | 13.6          | 1           | 4             | 1.5         | 4.0           | 5.0           | 0           | 0.0         | 2           | 5.8         |            |
|                                  | (24-31)           | (98.2-106.0)  | (4-5)          | (12.4-18.4)  | (2-1)         | (0.7-16.1)   | (0-0)          | (0.0)        | 0.4           | 0.4            | 4             | 0.4            | 13.6          | 1           | 4             | 1.5         | 4.0           | 5.0           | 0           | 0.0         | 2           | 5.8         |            |
| Sri Leone                        | (32,268-32,268)   | (764-3,936)   | (3,445-7,012)  | (69.9-184.3) | (1,368-3,442) | (32.6-85.8)  | (4,659-11,554) | (20.1-30.7)  | (10.6-27.8)   | (26.1-69.2)    | (90.1-275.7)  | (24.7-86.7)    | (701-3,420)   | (18.2-48.0) | (204-65.0)    | (650-754)   | (62-18.8)     | (3,315-3,131) | (56.6-84.6) | (428-797)   | (18.6-19.9) |             |            |
|                                  | (32,268-32,268)   | (764-3,936)   | (3,445-7,012)  | (69.9-184.3) | (1,368-3,442) | (32.6-85.8)  | (4,659-11,554) | (20.1-30.7)  | (10.6-27.8)   | (26.1-69.2)    | (90.1-275.7)  | (24.7-86.7)    | (701-3,420)   | (18.2-48.0) | (204-65.0)    | (650-754)   | (62-18.8)     | (3,315-3,131) | (56.6-84.6) | (428-797)   | (18.6-19.9) |             |            |
| Sri Leone                        | (80-80)           | 0             | 0              | 0            | 0             | 0            | 0              | 0            | 0             | 0              | 0             | 0              | 0             | 0           | 0             | 0           | 0             | 0             | 0           | 0           | 0           | 0           |            |
| Singapore                        | (155-211)         | (18.2-25.9)   | (12-21)        | (1.1-2.4)    | (12-24)       | (1.7-3.4)    | (0-0)          | (0.0)        | (2-6)         | (0.1-0.8)      | (1-1)         | (0.1-0.2)      | (2-48)        | (3.7-6.5)   | (0-0)         | (0.0-0.0)   | (2-6)         | (0.3-0.0)     | (0-1)       | (0.0-0.0)   | (11-16)     | (1.0-1.6)   |            |
|                                  | (155-211)         | (18.2-25.9)   | (12-21)        | (1.1-2.4)    | (12-24)       | (1.7-3.4)    | (0-0)          | (0.0)        | (2-6)         | (0.1-0.8)      | (1-1)         | (0.1-0.2)      | (2-48)        | (3.7-6.5)   | (0-0)         | (0.0-0.0)   | (2-6)         | (0.3-0.0)     | (0-1)       | (0.0-0.0)   | (11-16)     | (1.0-1.6)   |            |
| Slovakia                         | (390-849)         | (14.7-72.2)   | (36-62)        | (2.1-5.7)    | (16.7-16.0)   | (0-0)        | (0.0)          | (0.0)        | (11-35)       | (1.0-1.3)      | (1-4)         | (0.1-0.4)      | (80-214)      | (74-19.8)   | (1-3)         | (0.1-0.2)   | (8-32)        | (0.7-3.0)     | (0-1)       | (0.0-0.1)   | (38-61)     | (0.1-5.1)   |            |
|                                  | (390-849)         | (14.7-72.2)   | (36-62)        | (2.1-5.7)    | (16.7-16.0)   | (0-0)        | (0.0)          | (0.0)        | (11-35)       | (1.0-1.3)      | (1-4)         | (0.1-0.4)      | (80-214)      | (74-19.8)   | (1-3)         | (0.1-0.2)   | (8-32)        | (0.7-3.0)     | (0-1)       | (0.0-0.1)   | (38-61)     | (0.1-5.1)   |            |
| Slovenia                         | (86-189)          | (16.1-45.1)   | (2-5)          | (0.1-1.4)    | (0-0)         | (0.0)        | (0-0)          | (0.0)        | (11-14)       | (0.1-0.1)      | (0-0)         | (0.1-0.2)      | (10-41)       | (1.1-1.1)   | (0-0)         | (0.0-0.1)   | (0-1)         | (0-0)         | (0-1)       | (0-0)       | (11-0)      | (0.0-1.0)   |            |
|                                  | (86-189)          | (16.1-45.1)   | (2-5)          | (0.1-1.4)    | (0-0)         | (0.0)        | (0-0)          | (0.0)        | (11-14)       | (0.1-0.1)      | (0-0)         | (0.1-0.2)      | (10-41)       | (1.1-1.1)   | (0-0)         | (0.0-0.1)   | (0-1)         | (0-0)         | (0-1)       | (0-0)       | (11-0)      | (0.0-1.0)   |            |
| Solomon Islands                  | (267-309)         | (17.0-17.0)   | 49             | 17.0         | 17.0          | 14           | 4.7            | 8.5          | 33            | 33             | 27            | 8.5            | 33            | 33          | 10            | 4.7         | 10.8          | 4.0           | 3.2         | 12          | 12          | 12          |            |
|                                  | (267-309)         | (17.0-17.0)   | 49             | 17.0         | 17.0          | 14           | 4.7            | 8.5          | 33            | 33             | 27            | 8.5            | 33            | 33          | 10            | 4.7         | 10.8          | 4.0           | 3.2         | 12          | 12          | 12          |            |
| Somalia                          | (60,006-74,132)   | (100.4-996.4) | (8,101-15,470) | (10.5-198.4) | (4,162-1,048) | (10.5-198.4) | (2,558-10,078) | (14.6-114.1) | (14.1-54.6)   | (6,122-16,874) | (14.1-54.6)   | (6,122-16,874) | (880-3,815)   | (11.1-48.1) | (18.7-3,238)  | (10.6-39.9) | (1,084-4,124) | (1,728-5,551) | (321-71.5)  | (901-1,024) | (9.2-16.4)  |             |            |
|                                  | (60,006-74,132)   | (100.4-996.4) | (8,101-15,470) | (10.5-198.4) | (4,162-1,048) | (10.5-198.4) | (2,558-10,078) | (14.6-114.1) | (14.1-54.6)   | (6,122-16,874) | (14.1-54.6)   | (6,122-16,874) | (880-3,815)   | (11.1-48.1) | (18.7-3,238)  | (10.6-39.9) | (1,084-4,124) | (1,728-5,551) | (321-71.5)  | (901-1,024) | (9.2-16.4)  |             |            |
| South Africa                     | (47,774-70,240)   | (36.0-347.1)  | (4.02-96.45)   | (20.2-47.6)  | (2,646-6,527) | (13.1-32.4)  | (16-66)        | (0.1-0.3)    | (1,950-4,906) | (4.3-24.4)     | (4.34-16,557) | (20.4-52.0)    | (1,307-3,481) | (6.5-17.2)  | (908-3,044)   | (4.5-19.1)  | (1,313-7,354) | (16.4-36.5)   | (797-2,168) | (18.9-10.7) | (141-1,679) | (0.6-8.3)   |            |
|                                  | (47,774-70,240)   | (36.0-347.1)  | (4.02-96.45)   | (20.2-47.6)  | (2,646-6,527) | (13.1-32.4)  | (16-66)        | (0.1-0.3)    | (1,950-4,906) | (4.3-24.4)     | (4.34-16,557) | (20.4-52.0)    | (1,307-3,481) | (6.5-17.2)  | (908-3,044)   | (4.5-19.1)  | (1,313-7,354) | (16.4-36.5)   | (797-2,168) | (18.9-10.7) | (141-1,679) | (0.6-8.3)   |            |
| South Korea                      | 3,210             | 3,210         | 3,210          | 0.8          | 0.8           | 0            | 0              | 0.0          | 0             | 0              | 0             | 0              | 0             | 0           | 0             | 0           | 0             | 0             | 0           | 0           | 0           | 0           |            |
|                                  | 3,210             | 3,210         | 3,210          | 0.8          | 0.8           | 0            | 0              | 0.0          | 0             | 0              | 0             | 0              | 0             | 0           | 0             | 0           | 0             | 0             | 0           | 0           | 0           | 0           |            |
| South Korea                      | (1,808-3,418)     | (230-34.2)    | (60-96.5)      | (0.7-1.0)    | (274-141)     | (2.4-5.4)    | (0-0)          | (0.0)        | (7-12)        | (0.1-0.1)      | (4-12)        | (0.1-0.1)      | (30-481)      | (0.4-1.5)   | (79-198)      | (0.0-0.3)   | (84-115)      | (79-198)      | (0.0-0.1)   | (0-0)       | (330-26)    | (0.         |            |

**Table 5. Pediatric Population Numbers and Percent Contribution to Global Pediatric Population, for the Largest 50 Countries by 0 to 19 Population, Both Sexes, 2013**

| Location                         | 0 to 19 Population | % Contribution to Global 0 to 19 Population |
|----------------------------------|--------------------|---------------------------------------------|
| India                            | 482,566,134        | 19.55                                       |
| China                            | 341,657,145        | 13.84                                       |
| Nigeria                          | 94,573,289         | 3.83                                        |
| Indonesia                        | 93,263,616         | 3.78                                        |
| United States                    | 83,742,764         | 3.39                                        |
| Pakistan                         | 81,738,818         | 3.31                                        |
| Brazil                           | 65,291,354         | 2.65                                        |
| Bangladesh                       | 63,058,698         | 2.55                                        |
| Ethiopia                         | 51,123,289         | 2.07                                        |
| Mexico                           | 46,565,698         | 1.89                                        |
| Philippines                      | 43,817,373         | 1.78                                        |
| Democratic Republic of the Congo | 38,205,934         | 1.55                                        |
| Egypt                            | 33,088,977         | 1.34                                        |
| Vietnam                          | 28,536,689         | 1.16                                        |
| Russia                           | 28,299,711         | 1.15                                        |
| Tanzania                         | 27,191,802         | 1.10                                        |
| Turkey                           | 25,564,777         | 1.04                                        |
| Iran                             | 24,537,039         | 0.99                                        |
| Kenya                            | 23,410,221         | 0.95                                        |
| Uganda                           | 22,407,726         | 0.91                                        |
| Japan                            | 22,198,835         | 0.90                                        |
| South Africa                     | 20,250,789         | 0.82                                        |
| Sudan                            | 19,936,736         | 0.81                                        |
| Myanmar                          | 18,068,876         | 0.73                                        |
| Afghanistan                      | 17,897,753         | 0.73                                        |
| Colombia                         | 17,776,392         | 0.72                                        |
| Iraq                             | 17,141,165         | 0.69                                        |
| Thailand                         | 16,612,571         | 0.67                                        |
| France                           | 15,409,696         | 0.62                                        |
| United Kingdom                   | 14,845,056         | 0.60                                        |
| Germany                          | 14,651,713         | 0.59                                        |
| Mozambique                       | 14,533,490         | 0.59                                        |
| Algeria                          | 14,178,167         | 0.57                                        |
| Argentina                        | 13,441,355         | 0.54                                        |
| Yemen                            | 12,812,187         | 0.52                                        |
| Angola                           | 12,731,291         | 0.52                                        |
| Nepal                            | 12,719,653         | 0.52                                        |
| Ghana                            | 12,667,350         | 0.51                                        |
| Morocco                          | 12,250,373         | 0.50                                        |
| Madagascar                       | 12,237,912         | 0.50                                        |
| Cameroon                         | 12,024,240         | 0.49                                        |
| Peru                             | 11,665,942         | 0.47                                        |
| Italy                            | 11,519,922         | 0.47                                        |
| Venezuela                        | 11,428,795         | 0.46                                        |
| Uzbekistan                       | 11,285,568         | 0.46                                        |
| Niger                            | 10,708,474         | 0.43                                        |
| South Korea                      | 10,704,373         | 0.43                                        |
| Cote d'Ivoire                    | 10,634,693         | 0.43                                        |
| Malaysia                         | 10,557,683         | 0.43                                        |
| Saudi Arabia                     | 10,446,383         | 0.42                                        |

**Table 6. Annual Percent Change in Mortality Rates for the Top 10 Global Causes of Death for Children Under 5, Both Sexes, 1990-2013 (countries ranked from the fastest to slowest decline in all-cause mortality)**

| Location                       | All Cause | Lower Respiratory Infections | Preterm Birth Complications | Neonatal Encephalopathy | Malaria | Diarrheal Diseases | Congenital Anomalies | Neonatal Sepsis | Other Neonatal | Protein-Energy Malnutrition | Meningitis |
|--------------------------------|-----------|------------------------------|-----------------------------|-------------------------|---------|--------------------|----------------------|-----------------|----------------|-----------------------------|------------|
| Oman                           | -6.62     | -9.90                        | -6.31                       | -0.22                   | -3.72   | -13.20             | -3.79                | -1.96           | -7.31          | -10.29                      | -8.12      |
| China                          | -6.60     | -9.01                        | -7.09                       | -3.74                   | -10.12  | -14.29             | -3.18                | -1.65           | -5.71          | -11.61                      | -9.14      |
| Maldives                       | -6.52     | -11.29                       | -4.37                       | -3.98                   | -       | -15.89             | -5.95                | -3.21           | -5.67          | -10.19                      | -10.65     |
| Nepal                          | -6.48     | -6.16                        | -4.88                       | -4.89                   | -10.27  | -10.06             | -2.86                | -1.72           | -5.21          | -7.56                       | -8.07      |
| Timor-Leste                    | -6.44     | -6.14                        | -3.74                       | -2.79                   | -15.33  | -9.94              | -1.58                | -0.92           | -4.38          | -6.02                       | -6.60      |
| Macedonia                      | -6.36     | -9.06                        | -6.10                       | -6.81                   | -       | -14.05             | -3.06                | 2.17            | -7.25          | -7.66                       | -7.79      |
| Portugal                       | -6.26     | -7.99                        | -8.15                       | -8.23                   | -       | -7.47              | -5.67                | -4.18           | 0.06           | -7.13                       | -8.38      |
| El Salvador                    | -6.24     | -5.66                        | -6.67                       | -7.54                   | -21.89  | -13.92             | -0.14                | -3.81           | -7.40          | -7.39                       | -8.45      |
| Turkey                         | -6.20     | -12.15                       | -5.88                       | -6.74                   | -22.69  | -16.17             | -1.95                | -5.72           | -0.62          | -9.53                       | -12.62     |
| Sri Lanka                      | -6.18     | -3.52                        | -7.39                       | -6.48                   | -14.07  | -15.86             | -0.66                | -2.60           | -7.46          | -11.17                      | -7.25      |
| Estonia                        | -6.12     | -7.12                        | -5.48                       | -6.31                   | -       | -11.12             | -4.95                | 1.49            | -10.43         | -11.11                      | -8.43      |
| Iran                           | -6.11     | -9.67                        | -4.01                       | -2.74                   | -4.22   | -11.13             | -4.30                | 9.01            | -5.31          | -11.97                      | -9.76      |
| Czech Republic                 | -6.06     | -7.06                        | -7.70                       | -6.81                   | -       | -3.25              | -6.71                | -0.29           | -1.44          | -2.66                       | -7.08      |
| Egypt                          | -5.99     | -8.28                        | -4.28                       | -6.07                   | -8.84   | -10.66             | 0.08                 | -1.06           | -4.84          | -4.00                       | -9.46      |
| Saudi Arabia                   | -5.93     | -9.87                        | -6.29                       | -8.08                   | -8.14   | -11.06             | -4.45                | -3.54           | -6.82          | -10.89                      | -9.91      |
| Serbia                         | -5.88     | -8.11                        | -5.87                       | -7.09                   | -       | -7.78              | -5.07                | -4.41           | -4.95          | -5.32                       | -8.62      |
| Singapore                      | -5.70     | -5.79                        | -5.72                       | -7.63                   | -       | -9.01              | -6.26                | -2.93           | -3.98          | -9.29                       | -7.96      |
| Bangladesh                     | -5.61     | -6.60                        | -6.48                       | -0.74                   | -5.12   | -16.22             | -0.09                | -0.58           | -6.90          | -8.84                       | -0.86      |
| Peru                           | -5.57     | -7.83                        | -4.32                       | -3.23                   | -13.01  | -13.32             | -1.02                | -0.97           | -4.70          | -10.13                      | -5.40      |
| Tunisia                        | -5.42     | -9.32                        | -5.06                       | -5.72                   | -       | -12.73             | -3.08                | -0.82           | -4.47          | -9.03                       | -9.16      |
| Luxembourg                     | -5.34     | -5.94                        | -5.08                       | -5.91                   | -       | -2.96              | -5.93                | 7.60            | -5.85          | -3.95                       | -7.42      |
| Federated States of Micronesia | -5.27     | -7.48                        | -5.18                       | -4.04                   | -       | -9.32              | -1.34                | -2.50           | -5.89          | -8.29                       | -7.92      |
| Montenegro                     | -5.18     | -6.20                        | -5.19                       | -5.50                   | -       | -11.84             | -4.08                | -0.37           | -4.13          | -5.31                       | -6.48      |
| Hungary                        | -5.15     | -7.42                        | -5.60                       | -10.19                  | -       | -1.69              | -4.33                | -1.78           | 1.55           | -1.28                       | -7.45      |
| Poland                         | -5.14     | -7.15                        | -5.61                       | -7.43                   | -       | -8.85              | -4.24                | -3.21           | -4.63          | -5.99                       | -8.14      |
| Benin                          | -5.06     | -6.74                        | -3.44                       | -2.91                   | -2.51   | -9.10              | -3.24                | -1.51           | -3.60          | -7.40                       | -6.90      |
| United Arab Emirates           | -5.03     | -8.01                        | -6.25                       | -7.50                   | -4.18   | -10.80             | -3.51                | -2.36           | -5.09          | -7.18                       | -8.04      |
| Ethiopia                       | -4.95     | -4.42                        | -3.59                       | -4.26                   | -6.08   | -6.13              | -2.83                | -2.30           | -3.67          | -5.49                       | -5.65      |
| Liberia                        | -4.94     | -5.54                        | -2.98                       | -3.00                   | -2.55   | -7.77              | -3.53                | -1.40           | -2.53          | -5.66                       | -6.00      |
| Norway                         | -4.93     | -6.97                        | -4.43                       | -6.44                   | -       | 0.06               | -4.52                | -1.78           | -3.24          | -3.81                       | -7.84      |
| Andorra                        | -4.89     | -7.09                        | -5.74                       | -6.30                   | -       | -5.14              | -4.27                | -2.66           | -3.02          | -6.61                       | -7.35      |
| Bhutan                         | -4.83     | -5.77                        | -3.98                       | -2.22                   | -10.94  | -8.84              | -0.21                | -0.92           | -4.86          | -5.97                       | -6.27      |
| Lithuania                      | -4.83     | -5.44                        | -5.56                       | -6.06                   | -       | -9.29              | -4.73                | 0.73            | -5.57          | -11.16                      | -7.32      |
| Bahrain                        | -4.82     | -6.29                        | -5.71                       | -5.02                   | -       | -8.99              | -4.23                | 0.39            | -2.84          | -6.87                       | -7.09      |
| Myanmar                        | -4.78     | -5.35                        | -3.50                       | -2.61                   | -9.92   | -9.43              | -0.74                | -1.25           | -3.83          | -6.07                       | -6.27      |
| Brazil                         | -4.72     | -7.30                        | -5.03                       | -4.03                   | -13.64  | -11.43             | -0.71                | -1.46           | -0.15          | -8.50                       | -7.38      |
| Niger                          | -4.71     | -5.37                        | -2.89                       | -2.74                   | 0.95    | -7.03              | -3.31                | -0.97           | -2.91          | -4.78                       | -5.39      |
| Bosnia and Herzegovina         | -4.70     | -7.25                        | -5.66                       | -5.81                   | -       | -8.33              | -2.37                | -2.04           | -2.71          | -4.19                       | -7.60      |
| Armenia                        | -4.68     | -6.70                        | -4.76                       | -4.57                   | -       | -11.16             | -1.00                | -2.53           | -3.02          | -9.06                       | -6.43      |
| Laos                           | -4.68     | -4.00                        | -2.68                       | -1.72                   | -9.05   | -8.62              | -0.71                | 0.08            | -3.73          | -4.28                       | -4.46      |
| Thailand                       | -4.66     | -6.29                        | -6.00                       | -2.21                   | -13.17  | -9.60              | -2.18                | -0.40           | -5.33          | -5.44                       | -4.82      |
| Nicaragua                      | -4.63     | -4.73                        | -3.47                       | -3.99                   | -18.33  | -11.55             | -0.03                | -1.84           | -4.50          | -3.57                       | -6.63      |
| Iceland                        | -4.62     | -8.47                        | -4.49                       | -8.06                   | -       | -3.61              | -4.57                | -0.20           | 3.84           | -0.75                       | -8.17      |
| Romania                        | -4.61     | -5.47                        | -4.56                       | -6.79                   | -       | -7.58              | -3.00                | -2.65           | -4.46          | -6.39                       | -7.11      |
| Israel                         | -4.60     | -6.61                        | -5.92                       | -6.63                   | -       | -3.67              | -4.17                | -2.57           | -1.54          | -4.37                       | -6.00      |
| Indonesia                      | -4.57     | -6.37                        | -3.49                       | 0.66                    | -6.49   | -7.08              | -0.91                | -2.06           | -5.25          | -6.35                       | -6.05      |
| Lebanon                        | -4.54     | -6.55                        | -3.92                       | -5.69                   | -       | -9.96              | -1.66                | 0.23            | -2.26          | -5.55                       | -6.46      |
| Cyprus                         | -4.52     | -7.86                        | -5.07                       | -5.82                   | -       | -2.83              | -0.81                | -2.17           | -2.15          | -7.23                       | -6.85      |
| Guatemala                      | -4.52     | -4.00                        | -3.66                       | -1.46                   | -11.20  | -7.35              | 0.51                 | -1.19           | -4.19          | -4.06                       | -2.79      |



|                       |       |        |       |       |        |        |       |       |       |       |        |
|-----------------------|-------|--------|-------|-------|--------|--------|-------|-------|-------|-------|--------|
| Sweden                | -4.52 | -7.00  | -5.36 | -5.45 | -      | 2.10   | -4.66 | -1.71 | -0.70 | -3.66 | -6.69  |
| Bolivia               | -4.50 | -6.02  | -2.64 | -3.57 | -10.50 | -9.07  | -0.84 | -0.45 | -2.37 | -6.95 | -6.59  |
| Cambodia              | -4.50 | -4.65  | -1.99 | -1.20 | -9.10  | -8.79  | -0.02 | 0.97  | -5.05 | -4.48 | -5.24  |
| Libya                 | -4.50 | -8.07  | -4.45 | -5.76 | -      | -10.40 | -2.67 | -1.18 | -3.78 | -6.62 | -7.63  |
| Comoros               | -4.48 | -5.78  | -3.09 | -3.12 | -5.61  | -6.18  | -2.92 | -1.27 | -3.64 | -6.85 | -5.95  |
| Malawi                | -4.45 | -2.69  | -3.73 | -3.23 | -8.98  | -6.45  | -2.10 | -1.53 | -3.12 | -4.00 | -5.26  |
| Mozambique            | -4.44 | -6.80  | -3.45 | -2.71 | -0.94  | -8.15  | -2.88 | -1.29 | -3.62 | -8.97 | -7.28  |
| Eritrea               | -4.42 | -4.67  | -1.71 | -1.17 | 0.61   | -6.45  | -1.56 | 0.09  | -3.47 | -4.77 | -4.86  |
| Rwanda                | -4.37 | -5.12  | -2.78 | -2.26 | -4.00  | -6.74  | -2.23 | -0.81 | -3.71 | -5.94 | -5.23  |
| Vietnam               | -4.33 | 2.71   | -5.21 | -2.37 | -10.04 | -11.85 | -1.16 | -2.13 | -6.95 | -6.76 | -11.77 |
| Madagascar            | -4.32 | -4.73  | -3.29 | -3.83 | -0.87  | -6.27  | -2.64 | -1.55 | -2.61 | -5.42 | -5.35  |
| Mexico                | -4.28 | -5.91  | -3.63 | -5.27 | -19.32 | -11.41 | -0.47 | -0.57 | -3.21 | -6.61 | -6.93  |
| Latvia                | -4.25 | -5.48  | -4.50 | -3.89 | -      | -7.92  | -4.11 | -0.55 | -6.11 | -6.60 | -7.72  |
| Malaysia              | -4.24 | -4.79  | -5.51 | -4.88 | -8.66  | -7.89  | -1.64 | -1.01 | -7.70 | -7.41 | -5.65  |
| Yemen                 | -4.23 | -6.06  | -2.45 | -3.45 | -1.33  | -6.57  | -2.04 | 0.80  | -2.32 | -3.51 | -4.70  |
| Chile                 | -4.21 | -8.26  | -5.47 | -6.52 | -      | -9.17  | -2.32 | -2.83 | -0.61 | -6.18 | -6.58  |
| North Korea           | -4.20 | -6.29  | -3.33 | -3.07 | -20.97 | -9.14  | -2.24 | -0.88 | -3.33 | -7.42 | -6.96  |
| Morocco               | -4.17 | -7.38  | -0.53 | -1.86 | -4.09  | -14.10 | -1.86 | -1.88 | -6.14 | -0.73 | -7.31  |
| Denmark               | -4.15 | -4.49  | -2.92 | -5.12 | -      | -0.90  | -5.29 | 3.83  | -4.27 | -1.09 | -6.61  |
| Italy                 | -4.14 | -7.53  | -4.90 | -5.63 | -      | -3.69  | -3.92 | -1.48 | -0.17 | -0.50 | -5.61  |
| Senegal               | -4.14 | -4.48  | -2.83 | -2.49 | -4.03  | -7.48  | -2.02 | -1.37 | -3.06 | -5.18 | -5.10  |
| Syria                 | -4.09 | -10.24 | -7.23 | -8.24 | -6.67  | -16.25 | -3.90 | -4.21 | -6.87 | -0.79 | -7.65  |
| Palestine             | -4.07 | -7.06  | -2.37 | 0.98  | -      | -11.06 | -3.54 | 3.82  | -1.08 | -5.15 | -7.28  |
| Slovenia              | -4.07 | -5.77  | -4.27 | -6.01 | -      | -6.47  | -3.97 | 0.22  | 1.67  | -6.60 | -6.26  |
| Greece                | -4.04 | -3.05  | -4.20 | -4.63 | -      | -5.18  | -3.93 | -6.72 | 0.30  | -7.72 | -4.76  |
| Spain                 | -4.04 | -6.10  | -5.14 | -4.63 | -      | -4.80  | -4.17 | -1.14 | 1.04  | -4.97 | -6.13  |
| Belarus               | -4.02 | -7.99  | -5.00 | -5.01 | -      | -9.81  | -3.12 | -1.27 | -3.20 | -6.60 | -5.17  |
| South Korea           | -4.01 | -8.29  | -0.90 | -1.21 | -19.72 | -9.74  | -6.22 | 0.78  | 1.68  | -8.91 | -9.07  |
| Cuba                  | -4.00 | -4.45  | -5.67 | -5.79 | -      | -7.51  | -3.48 | -2.26 | 0.47  | -4.19 | -8.09  |
| Germany               | -4.00 | -4.71  | -4.25 | -3.72 | -      | -0.56  | -3.95 | -2.25 | -1.61 | -4.89 | -6.14  |
| India                 | -4.00 | -5.84  | -3.90 | -1.77 | -7.78  | -6.63  | -0.64 | -1.18 | -4.29 | -3.16 | -6.83  |
| Sudan                 | -3.98 | -5.20  | -2.56 | -3.23 | -4.43  | -6.68  | -1.69 | 0.50  | -1.66 | -4.24 | -4.91  |
| Cape Verde            | -3.96 | -5.34  | -3.59 | -2.68 | -9.81  | -8.39  | -1.00 | -1.50 | -2.82 | -6.01 | -5.68  |
| Sao Tome and Principe | -3.95 | -5.22  | -2.81 | -2.34 | -2.88  | -8.17  | -1.87 | -0.92 | -2.33 | -5.66 | -5.55  |
| Honduras              | -3.91 | -4.45  | -2.97 | -3.41 | -7.56  | -8.50  | -0.66 | -0.72 | -3.36 | -4.79 | -5.13  |
| Croatia               | -3.86 | -6.75  | -5.06 | -4.18 | -      | -7.24  | -2.93 | 6.15  | -4.35 | -5.53 | -6.13  |
| Belgium               | -3.85 | -3.81  | -5.23 | -4.01 | -      | -0.88  | -3.57 | -2.06 | -0.39 | -3.82 | -4.34  |
| Kyrgyzstan            | -3.82 | -6.48  | -0.85 | -2.03 | -      | -7.31  | -0.39 | -0.66 | -1.70 | -4.78 | -7.10  |
| Guinea                | -3.79 | -4.38  | -2.29 | -2.22 | -2.21  | -7.82  | -2.45 | -0.85 | -2.61 | -3.92 | -4.73  |
| Azerbaijan            | -3.78 | -5.44  | -2.33 | -1.55 | -18.66 | -8.11  | -1.10 | -0.12 | -0.91 | -5.96 | -3.50  |
| Austria               | -3.73 | -5.65  | -3.63 | -5.25 | -      | 1.78   | -3.37 | -1.91 | -0.82 | -2.86 | -5.61  |
| Haiti                 | -3.72 | -4.40  | -2.14 | -2.04 | -10.01 | -7.02  | 0.18  | -0.31 | -2.56 | -2.88 | -5.27  |
| Moldova               | -3.72 | -4.46  | -3.97 | -6.66 | -      | -7.24  | -1.94 | -3.09 | 0.29  | -9.86 | -6.01  |
| Algeria               | -3.71 | -6.53  | -2.85 | -3.20 | -4.56  | -9.21  | -1.51 | -0.91 | -3.15 | -6.80 | -6.59  |
| Finland               | -3.71 | -7.35  | -4.45 | -4.23 | -      | -3.39  | -3.80 | 2.25  | -2.72 | -5.31 | -5.99  |
| France                | -3.69 | -4.67  | -4.44 | -4.02 | -      | -3.53  | -3.44 | -2.63 | 1.55  | -3.47 | -5.18  |
| The Gambia            | -3.68 | -5.30  | -0.86 | -0.57 | -3.17  | -4.32  | -1.91 | 0.14  | -0.88 | -5.25 | -4.68  |
| Tajikistan            | -3.66 | -4.86  | -1.61 | -2.44 | -6.50  | -6.49  | 0.76  | 0.14  | -0.42 | -0.02 | -2.69  |
| Zambia                | -3.62 | -4.13  | -3.12 | -2.02 | -2.74  | -6.26  | -1.82 | -0.92 | -2.12 | -3.73 | -4.14  |
| Venezuela             | -3.61 | -3.90  | -4.23 | -4.30 | -7.08  | -7.79  | -0.79 | -1.56 | -3.70 | -4.54 | -5.98  |
| Albania               | -3.57 | -5.94  | -3.22 | -4.52 | -      | -7.97  | 1.03  | -0.07 | -0.13 | -4.12 | -4.57  |
| Mongolia              | -3.55 | -5.69  | -2.03 | -1.74 | -      | -12.72 | 1.44  | -0.09 | -1.52 | -9.45 | -10.30 |
| Netherlands           | -3.55 | -3.77  | -4.53 | -4.37 | -      | 0.49   | -3.79 | -1.44 | 0.86  | -3.68 | -5.11  |

|                                         |       |       |       |       |        |        |       |       |       |       |       |
|-----------------------------------------|-------|-------|-------|-------|--------|--------|-------|-------|-------|-------|-------|
| <b>Developed</b>                        | -3.54 | -5.92 | -3.76 | -5.15 | -20.86 | -6.31  | -3.21 | -1.55 | -1.38 | -5.14 | -5.46 |
| <b>Belize</b>                           | -3.53 | -5.41 | -4.04 | -3.24 | -5.75  | -7.01  | -1.10 | -1.33 | -1.49 | -5.37 | -6.14 |
| <b>Angola</b>                           | -3.48 | -3.49 | -1.77 | -0.34 | -1.14  | -5.38  | -0.59 | 0.70  | -3.89 | -3.42 | -3.68 |
| <b>Russia</b>                           | -3.45 | -4.48 | -5.03 | -7.14 | -      | -7.24  | -2.69 | -1.44 | 0.16  | -3.42 | -4.96 |
| <b>Uganda</b>                           | -3.45 | -3.51 | -2.31 | -1.76 | -1.52  | -8.06  | -1.16 | -0.45 | -2.32 | -3.60 | -4.46 |
| <b>Uruguay</b>                          | -3.45 | -3.01 | -4.58 | -6.44 | -      | -6.51  | -2.29 | -1.86 | -2.28 | -7.21 | -7.21 |
| <b>Australia</b>                        | -3.43 | -4.13 | -4.68 | -3.26 | -      | -0.49  | -3.44 | -2.66 | 0.89  | -4.18 | -5.52 |
| <b>Burkina Faso</b>                     | -3.40 | -3.42 | -2.40 | -3.05 | -0.71  | -5.61  | -1.95 | -1.54 | -3.75 | -3.19 | -3.75 |
| <b>Namibia</b>                          | -3.33 | -4.14 | -2.31 | -1.63 | 2.24   | -6.09  | -0.73 | -0.25 | -2.75 | -4.81 | -4.91 |
| <b>Dominican Republic</b>               | -3.29 | -2.44 | -2.80 | -3.36 | -3.49  | -10.19 | -0.33 | -0.23 | -2.50 | -7.85 | -6.46 |
| <b>Afghanistan</b>                      | -3.27 | -2.81 | -1.40 | -1.88 | -1.93  | -5.00  | -1.48 | 1.69  | -2.83 | -1.19 | -2.82 |
| <b>New Zealand</b>                      | -3.24 | -5.64 | -3.35 | -4.29 | -      | -0.70  | -3.11 | -0.88 | 1.56  | -4.02 | -4.05 |
| <b>Tanzania</b>                         | -3.24 | -3.38 | -1.98 | -1.51 | -4.94  | -6.35  | -0.06 | -0.83 | -2.41 | -2.94 | -2.25 |
| <b>The Bahamas</b>                      | -3.19 | -4.67 | -3.66 | -3.83 | -      | -6.01  | -1.14 | -1.57 | -1.38 | -4.72 | -5.67 |
| <b>Burundi</b>                          | -3.17 | -3.78 | -1.52 | -1.37 | -2.80  | -4.62  | -1.66 | -0.53 | -2.59 | -3.37 | -3.15 |
| <b>Argentina</b>                        | -3.16 | -3.70 | -3.81 | -4.72 | -18.34 | -7.03  | -1.32 | -1.76 | -2.58 | -7.72 | -4.87 |
| <b>Costa Rica</b>                       | -3.15 | -5.13 | -4.64 | -4.18 | -18.02 | -6.44  | -1.83 | -2.64 | -1.84 | -6.90 | -4.37 |
| <b>Turkmenistan</b>                     | -3.13 | -3.56 | -1.39 | -2.35 | -      | -4.93  | -1.45 | 0.33  | -0.07 | -4.31 | -4.19 |
| <b>Philippines</b>                      | -3.11 | -5.57 | -2.29 | 1.13  | -10.76 | -4.77  | 0.79  | 2.40  | -5.10 | -5.09 | -2.94 |
| <b>Grenada</b>                          | -3.10 | -4.15 | -3.89 | -3.01 | -      | -7.03  | -1.02 | -0.82 | -2.25 | -4.78 | -6.40 |
| <b>Developing</b>                       | -3.05 | -3.99 | -3.45 | -1.47 | -0.20  | -5.12  | -1.21 | 0.05  | -3.46 | -2.19 | -3.41 |
| <b>Solomon Islands</b>                  | -3.05 | -3.80 | -1.81 | -1.16 | -5.56  | -5.18  | 0.29  | 0.09  | -3.94 | -4.39 | -4.54 |
| <b>Japan</b>                            | -3.03 | -2.86 | -4.42 | -4.66 | -      | -1.65  | -2.82 | -1.60 | -1.54 | -1.01 | -4.33 |
| <b>South Sudan</b>                      | -3.02 | -3.14 | -2.05 | -0.99 | -4.63  | -4.33  | -2.36 | -0.67 | -2.88 | -3.98 | -3.49 |
| <b>Ireland</b>                          | -3.01 | -3.88 | -3.23 | -3.72 | -      | 0.12   | -2.55 | 1.73  | 0.66  | -4.76 | -4.53 |
| <b>Global</b>                           | -2.99 | -3.93 | -3.39 | -1.46 | -0.12  | -5.04  | -1.30 | 0.11  | -3.34 | -2.11 | -3.36 |
| <b>Slovakia</b>                         | -2.99 | -5.50 | -3.40 | -2.16 | -      | -3.84  | -1.93 | -1.40 | -5.69 | -4.94 | -3.46 |
| <b>Ecuador</b>                          | -2.98 | -2.37 | -1.76 | -1.87 | -11.48 | -8.75  | 1.64  | -0.47 | -2.74 | -5.17 | -3.60 |
| <b>Sierra Leone</b>                     | -2.98 | -3.39 | -1.91 | -1.88 | -2.32  | -7.24  | -1.67 | -0.60 | -1.86 | -2.82 | -4.01 |
| <b>United Kingdom</b>                   | -2.93 | -3.84 | -2.34 | -4.96 | -      | 2.28   | -2.55 | -1.78 | -1.46 | -4.60 | -4.37 |
| <b>Colombia</b>                         | -2.92 | -4.21 | -3.06 | -4.03 | -0.66  | -7.68  | 0.18  | 0.17  | -0.63 | -3.16 | -4.92 |
| <b>Samoa</b>                            | -2.92 | -4.16 | -3.84 | -2.92 | -      | -6.59  | -0.89 | -1.78 | -3.91 | -5.64 | -4.83 |
| <b>Djibouti</b>                         | -2.91 | -4.12 | -2.06 | -2.01 | -0.39  | -5.25  | -2.50 | -1.18 | -2.52 | -4.35 | -4.27 |
| <b>Qatar</b>                            | -2.90 | -3.22 | -3.28 | -4.00 | -      | -4.14  | -2.42 | -8.83 | -2.60 | -3.41 | -0.77 |
| <b>South Africa</b>                     | -2.90 | -2.75 | -1.76 | -0.93 | -4.28  | -4.79  | -2.37 | -0.47 | -3.00 | -5.94 | -5.02 |
| <b>Switzerland</b>                      | -2.88 | -4.71 | -2.14 | -3.19 | -      | -1.93  | -3.30 | -0.26 | -0.16 | 0.29  | -5.75 |
| <b>Georgia</b>                          | -2.85 | -7.41 | -0.77 | -3.64 | -      | -7.41  | -0.46 | 2.33  | 5.36  | 2.42  | -3.41 |
| <b>Iraq</b>                             | -2.80 | -4.16 | -2.14 | -2.62 | -      | -6.21  | -1.59 | -1.02 | -2.24 | -4.31 | -4.48 |
| <b>Jordan</b>                           | -2.77 | -4.01 | -3.15 | -3.32 | -      | -8.42  | -0.82 | -0.64 | -3.70 | -5.50 | -5.58 |
| <b>Ukraine</b>                          | -2.73 | -6.31 | -2.77 | -3.35 | -      | -7.07  | -2.22 | 0.54  | -1.16 | -5.89 | -3.47 |
| <b>Mali</b>                             | -2.68 | -3.84 | -1.80 | -1.43 | 1.06   | -5.14  | -2.19 | -0.30 | -2.47 | -3.42 | -3.94 |
| <b>Paraguay</b>                         | -2.64 | -4.96 | -1.96 | -2.25 | -17.48 | -7.74  | 1.07  | -1.00 | -0.81 | -2.12 | -4.41 |
| <b>Botswana</b>                         | -2.61 | -3.39 | -2.17 | -0.95 | 0.29   | -4.81  | -0.17 | 0.03  | -2.21 | -4.37 | -3.97 |
| <b>Ghana</b>                            | -2.54 | -2.85 | -2.21 | -1.02 | -2.06  | -8.27  | -0.33 | 0.38  | -1.45 | -0.23 | -2.22 |
| <b>Saint Lucia</b>                      | -2.52 | -3.29 | -3.25 | -2.05 | -      | -6.08  | -0.36 | -1.07 | -0.11 | -4.29 | -4.61 |
| <b>Bulgaria</b>                         | -2.49 | -4.28 | -1.68 | -1.03 | -      | -2.88  | -2.29 | 1.00  | -5.16 | 2.81  | -3.20 |
| <b>Kiribati</b>                         | -2.48 | -2.24 | -2.34 | -2.82 | -      | -7.56  | 0.91  | 1.42  | -1.58 | -3.06 | -4.82 |
| <b>United States</b>                    | -2.43 | -3.76 | -2.74 | -2.83 | -      | -1.90  | -2.19 | -0.98 | -1.66 | -2.94 | -4.20 |
| <b>Kazakhstan</b>                       | -2.41 | -5.63 | -0.79 | -1.91 | -      | -9.03  | 0.46  | 1.65  | 0.76  | -3.62 | -4.01 |
| <b>Somalia</b>                          | -2.39 | -2.73 | -1.70 | -1.29 | -1.36  | -2.54  | -2.37 | -0.99 | -1.35 | -3.04 | -2.50 |
| <b>Saint Vincent and the Grenadines</b> | -2.38 | -3.14 | -3.17 | -2.33 | -      | -7.06  | -0.85 | 2.47  | 6.55  | -4.46 | -5.79 |
| <b>Papua New Guinea</b>                 | -2.37 | -2.34 | -0.82 | -0.37 | -4.42  | -5.14  | -0.20 | 0.68  | -2.83 | -3.14 | -4.15 |
| <b>Nigeria</b>                          | -2.34 | -2.71 | -1.73 | -1.69 | -0.55  | -6.52  | -0.80 | 0.02  | -2.49 | -2.84 | -3.52 |

|                                  |       |       |       |       |       |       |       |       |       |       |       |
|----------------------------------|-------|-------|-------|-------|-------|-------|-------|-------|-------|-------|-------|
| Kenya                            | -2.27 | -2.33 | -1.58 | -1.31 | -5.29 | -2.49 | -0.57 | -0.22 | -1.14 | -1.86 | -2.77 |
| Kuwait                           | -2.22 | -5.28 | -1.86 | -5.34 | -     | -8.08 | -0.84 | -1.11 | -6.84 | -7.11 | -4.29 |
| Mauritius                        | -2.21 | -2.90 | -3.64 | -3.34 | 0.44  | -7.38 | 0.76  | -1.38 | 1.78  | -3.83 | -3.81 |
| Jamaica                          | -2.20 | -3.02 | -2.37 | -2.18 | -     | -7.74 | 0.34  | -0.24 | -1.34 | -6.04 | -4.05 |
| Cote d'Ivoire                    | -2.19 | -2.40 | -0.98 | -1.17 | -1.65 | -4.42 | -0.96 | 0.13  | -1.53 | -1.77 | -2.40 |
| Barbados                         | -2.15 | -3.04 | -2.79 | -2.47 | -     | -5.37 | -0.38 | -0.52 | -0.62 | -4.05 | -4.66 |
| Togo                             | -2.14 | -3.15 | -1.26 | -1.34 | -0.10 | -3.63 | -1.35 | 0.05  | -1.75 | -3.28 | -3.17 |
| Equatorial Guinea                | -2.11 | -1.81 | -1.89 | 0.24  | -1.59 | -6.85 | 0.97  | 0.56  | -2.78 | -3.41 | -2.72 |
| Uzbekistan                       | -2.07 | -2.34 | -1.29 | -1.05 | .     | -9.73 | 0.45  | 0.25  | -0.81 | -8.67 | -4.50 |
| Marshall Islands                 | -2.05 | -3.09 | -0.77 | -0.75 | -     | -4.00 | 0.50  | -0.24 | -3.04 | -3.29 | -3.45 |
| Canada                           | -2.01 | -3.07 | -1.90 | -1.76 | -     | 1.44  | -2.69 | 0.06  | 1.63  | -3.03 | -3.46 |
| Democratic Republic of the Congo | -1.99 | -1.91 | -1.11 | -1.19 | -4.87 | -0.53 | -0.84 | -0.08 | -2.55 | -0.62 | -1.24 |
| Mauritania                       | -1.97 | -1.70 | -0.99 | -0.33 | 0.96  | -5.65 | 0.17  | 1.09  | -2.59 | -1.58 | -2.72 |
| Pakistan                         | -1.96 | -1.88 | -1.83 | 0.10  | -9.88 | -3.85 | -0.17 | 1.85  | -3.31 | -2.23 | -2.07 |
| Congo                            | -1.89 | -1.63 | -1.49 | -0.89 | -5.09 | -1.95 | 0.22  | -0.11 | -1.86 | -1.51 | -1.56 |
| Guinea-Bissau                    | -1.84 | -3.04 | -1.09 | -1.04 | 0.04  | -4.37 | -1.09 | 0.23  | -1.77 | -2.19 | -2.72 |
| Seychelles                       | -1.80 | -1.71 | -2.85 | -2.03 | -     | -1.96 | -1.13 | -0.78 | -1.76 | 0.33  | -1.81 |
| Panama                           | -1.79 | -1.33 | -2.94 | -2.14 | -6.13 | -3.32 | -0.05 | -0.71 | -2.11 | -2.03 | -3.63 |
| Taiwan                           | -1.73 | -2.28 | -3.84 | -2.76 | -     | -3.26 | -0.97 | 2.18  | -0.65 | -3.92 | -3.06 |
| Chad                             | -1.72 | -1.11 | -1.16 | -0.55 | 0.37  | -2.35 | -0.63 | 0.30  | -1.14 | -0.97 | -1.43 |
| Guyana                           | -1.64 | -2.53 | -2.14 | -0.48 | -9.88 | -5.49 | 1.68  | 0.56  | 0.39  | -3.84 | -2.80 |
| Gabon                            | -1.63 | -1.39 | -1.39 | -0.85 | -4.02 | -3.88 | 0.42  | -0.05 | -1.55 | -1.32 | -1.75 |
| Dominica                         | -1.54 | -2.10 | -2.40 | -0.68 | -     | -5.51 | 0.16  | 0.07  | -0.58 | -3.18 | -4.50 |
| Cameroon                         | -1.44 | -1.41 | -0.74 | -0.81 | -1.17 | -4.08 | -0.01 | 0.68  | -0.85 | -0.96 | -1.55 |
| Malta                            | -1.32 | -1.44 | -2.90 | -2.24 | -     | -1.03 | -0.30 | 1.50  | 8.53  | -4.77 | -4.14 |
| Central African Republic         | -1.29 | -0.96 | -0.62 | -0.45 | -1.68 | -2.83 | -0.41 | 0.25  | -0.95 | -0.20 | -1.10 |
| Brunei                           | -1.21 | -1.38 | -1.84 | -2.08 | -     | -1.11 | -0.69 | -0.72 | -0.84 | -3.38 | -2.21 |
| Suriname                         | -1.18 | -1.71 | -1.23 | -0.70 | -5.62 | -5.94 | 0.94  | 0.46  | -0.27 | -2.57 | -3.45 |
| Antigua and Barbuda              | -1.03 | -1.24 | -1.72 | -0.89 | -     | -3.79 | 0.53  | -0.20 | 0.29  | -2.21 | -2.62 |
| Tonga                            | -0.82 | -1.08 | -0.59 | 1.27  | -     | -1.94 | 0.82  | 0.45  | -2.27 | -0.84 | -1.04 |
| Trinidad and Tobago              | -0.71 | -2.01 | -1.34 | -1.63 | -     | -3.79 | 1.24  | 0.47  | 0.96  | -1.80 | -2.83 |
| Vanuatu                          | -0.31 | -0.11 | 0.66  | 1.24  | -1.83 | -1.23 | 2.16  | 1.75  | -1.86 | 0.10  | -0.59 |
| Fiji                             | -0.13 | -1.80 | -0.61 | -0.58 | -     | 1.27  | 3.60  | 0.73  | -1.81 | -0.67 | -0.37 |
| Swaziland                        | -0.11 | 0.46  | 0.09  | 0.82  | -2.46 | -1.72 | 1.26  | 1.65  | -0.73 | -0.11 | -0.41 |
| Lesotho                          | -0.04 | 0.60  | 0.00  | 0.74  | -     | -1.62 | 0.98  | 1.24  | -0.46 | 0.06  | -0.59 |
| Zimbabwe                         | 0.18  | -1.15 | 0.20  | 2.63  | 1.76  | 3.75  | 0.13  | 1.27  | -5.56 | -0.17 | 0.38  |

**Table 7. Annual Percent Change in Mortality Rates for the Top 10 Global Causes of Death for Ages 5 to 9, Both Sexes, 1990-2013 (countries ranked from the fastest to slowest decline in all-cause mortality)**

| Location               | All Cause | Diarrheal Diseases | Lower Respiratory Infections | Road Injuries | Intestinal Infections | Malaria | Drowning | HIV/AIDS | Hemoglobinopathies | Congenital Anomalies | Meningitis |
|------------------------|-----------|--------------------|------------------------------|---------------|-----------------------|---------|----------|----------|--------------------|----------------------|------------|
| South Korea            | -7.81     | -13.31             | -11.69                       | -9.03         | -1.00                 | -23.84  | -8.30    | -4.77    | -6.68              | -7.60                | -13.84     |
| Nepal                  | -6.54     | -10.34             | -7.38                        | -4.43         | -0.42                 | -7.55   | -2.98    | 15.35    | -3.85              | -1.92                | -8.14      |
| Timor-Leste            | -6.50     | -12.48             | -6.30                        | -3.04         | -3.86                 | -8.82   | -2.97    | 24.36    | -3.16              | -1.06                | -7.03      |
| Maldives               | -6.15     | -12.46             | -8.43                        | -6.07         | -7.36                 | -       | -5.60    | 9.57     | -5.68              | -4.56                | -8.54      |
| Bangladesh             | -5.95     | -15.61             | -6.22                        | -3.12         | -2.70                 | -12.30  | -4.84    | .        | -5.18              | -0.50                | 0.86       |
| Egypt                  | -5.70     | -10.99             | -10.74                       | 1.56          | -1.05                 | -5.68   | -4.73    | 15.54    | -6.15              | -2.01                | -10.59     |
| Estonia                | -5.40     | -8.07              | -5.01                        | -8.33         | -2.96                 | -       | -6.07    | 32.85    | -5.33              | -4.71                | -7.63      |
| Macedonia              | -5.33     | -12.59             | -7.72                        | -6.50         | -1.79                 | -       | -4.84    | 4.72     | -5.27              | -2.94                | -7.67      |
| Oman                   | -5.31     | -9.38              | -6.77                        | -6.76         | -0.47                 | -6.36   | -4.55    | 10.45    | -5.46              | -2.23                | -5.66      |
| Iran                   | -5.28     | -8.84              | -5.49                        | -4.92         | -0.03                 | -4.06   | -4.76    | 14.65    | -4.62              | -2.84                | -6.71      |
| Guatemala              | -5.18     | -7.86              | -5.49                        | -0.49         | 2.00                  | -14.34  | -1.79    | 16.73    | -2.93              | -0.89                | -3.17      |
| China                  | -5.03     | -14.80             | -7.03                        | -2.33         | -13.66                | -9.43   | -5.15    | 26.94    | -4.25              | -2.53                | -7.75      |
| Portugal               | -5.02     | -2.46              | -5.70                        | -7.74         | -2.71                 | -       | -6.40    | -4.13    | -4.54              | -3.42                | -7.06      |
| Bhutan                 | -4.99     | -8.78              | -6.20                        | -4.72         | -0.59                 | -10.33  | -3.84    | 17.95    | -3.75              | -0.63                | -7.06      |
| Turkey                 | -4.98     | -14.20             | -8.46                        | -5.05         | -0.19                 | -20.40  | -6.02    | 35.52    | -4.87              | -4.87                | -2.52      |
| Bolivia                | -4.90     | -9.05              | -5.86                        | -5.96         | 1.34                  | -8.79   | -3.97    | 22.20    | -3.67              | -1.68                | -6.69      |
| Iceland                | -4.89     | -3.99              | -9.39                        | -7.56         | -0.10                 | -       | -7.16    | 0.63     | -4.43              | -5.15                | -8.10      |
| Peru                   | -4.83     | -11.88             | -6.48                        | -2.22         | 0.84                  | -8.54   | -3.01    | 0.42     | -4.16              | -2.03                | -5.11      |
| Cambodia               | -4.80     | -10.87             | -4.79                        | -1.15         | -3.46                 | -5.28   | -0.55    | 26.87    | -1.32              | 0.48                 | -5.91      |
| Luxembourg             | -4.76     | -2.86              | -4.28                        | -4.98         | -0.20                 | -       | -6.42    | 21.05    | -6.09              | -4.73                | -5.37      |
| Liberia                | -4.72     | -6.07              | -4.64                        | -4.68         | -0.18                 | -5.61   | -3.37    | 25.66    | -3.29              | -2.60                | -4.71      |
| Romania                | -4.72     | -7.04              | -6.32                        | -5.62         | -3.15                 | -       | -4.09    | 4.41     | -4.59              | -4.86                | -7.50      |
| Latvia                 | -4.70     | -7.70              | -3.66                        | -7.44         | -4.03                 | -       | -4.60    | 3.06     | -4.13              | -4.82                | -8.55      |
| Benin                  | -4.68     | -7.45              | -5.02                        | -4.06         | 0.04                  | -6.13   | -3.43    | 18.54    | -3.10              | -2.11                | -4.89      |
| Bahrain                | -4.65     | -6.21              | -5.83                        | -6.39         | -1.10                 | -       | -5.39    | 12.20    | -5.86              | -3.81                | -6.75      |
| Czech Republic         | -4.65     | -1.82              | -4.73                        | -6.01         | -3.04                 | -       | -5.66    | -4.02    | -5.41              | -4.21                | -5.82      |
| Serbia                 | -4.64     | -5.98              | -6.42                        | -6.28         | -3.14                 | -       | -4.98    | 2.71     | -5.19              | -3.39                | -6.74      |
| Myanmar                | -4.54     | -9.28              | -4.39                        | -2.51         | -4.35                 | -6.28   | -2.40    | .        | -2.38              | -0.32                | -5.55      |
| Laos                   | -4.49     | -10.07             | -3.54                        | -0.48         | -3.49                 | -3.90   | -0.60    | 12.41    | -0.99              | 0.19                 | -4.73      |
| Bosnia and Herzegovina | -4.47     | -7.81              | -7.23                        | 2.27          | -3.27                 | -       | 11.65    | 17.33    | -3.71              | -2.09                | -7.36      |
| Saudi Arabia           | -4.47     | -7.40              | -6.30                        | -5.15         | -0.33                 | -7.68   | -4.87    | 12.20    | -4.93              | -2.95                | -7.87      |
| Ethiopia               | -4.45     | -6.16              | -4.31                        | -2.21         | 0.02                  | -6.32   | -3.61    | 13.49    | -2.97              | -2.14                | -4.56      |
| Indonesia              | -4.43     | -7.84              | -4.33                        | -4.51         | -4.37                 | -7.08   | -2.67    | .        | -2.19              | -0.47                | -5.00      |
| United Arab Emirates   | -4.35     | -8.80              | -6.74                        | -5.71         | -1.22                 | -3.17   | -5.34    | 12.20    | -4.98              | -2.81                | -7.58      |
| Denmark                | -4.34     | -1.06              | -4.57                        | -7.29         | 0.23                  | -       | -3.46    | -12.79   | -3.96              | -4.31                | -7.80      |
| Germany                | -4.34     | 1.50               | -4.48                        | -8.36         | -1.89                 | -       | -5.87    | -12.14   | -3.54              | -3.40                | -5.75      |
| Lithuania              | -4.31     | -6.70              | -3.41                        | -6.34         | -3.22                 | -       | -4.46    | -3.30    | -4.82              | -3.89                | -6.86      |
| Tunisia                | -4.30     | -9.89              | -6.12                        | -4.95         | -0.32                 | -       | -4.14    | 9.36     | -4.52              | -2.34                | -7.19      |
| El Salvador            | -4.28     | -11.88             | -4.71                        | -4.45         | 0.24                  | -19.85  | -1.50    | -7.26    | -4.78              | -0.09                | -6.65      |
| Madagascar             | -4.28     | -5.76              | -4.56                        | -4.77         | -0.54                 | -6.10   | -3.21    | 25.57    | -3.30              | -2.49                | -4.47      |
| Comoros                | -4.17     | -5.31              | -5.11                        | -5.48         | -0.48                 | -5.17   | -3.08    | 29.51    | -3.65              | -2.67                | -4.29      |
| Senegal                | -4.15     | -6.18              | -4.01                        | -2.41         | 0.83                  | -8.27   | -2.10    | 17.63    | -1.79              | -1.13                | -4.51      |
| Honduras               | -4.14     | -9.13              | -4.85                        | -3.71         | 0.84                  | -9.11   | -3.19    | 4.78     | -3.34              | -1.36                | -5.19      |
| India                  | -4.14     | -4.97              | -5.52                        | -3.96         | -1.53                 | -2.64   | -2.98    | 4.50     | -3.17              | -1.25                | -8.19      |
| Sudan                  | -4.14     | -6.04              | -4.38                        | -2.92         | 0.86                  | -5.09   | -2.84    | 12.83    | -3.09              | -2.13                | -5.10      |
| Rwanda                 | -4.13     | -6.71              | -4.82                        | -4.00         | -0.07                 | -8.98   | -2.87    | 3.70     | -3.36              | -2.45                | -4.51      |
| Yemen                  | -4.13     | -6.93              | -4.49                        | -2.79         | 0.67                  | -3.59   | -2.65    | 12.85    | -2.97              | -2.14                | -4.73      |
| Eritrea                | -4.12     | -6.52              | -4.01                        | -3.27         | 1.24                  | -7.99   | -1.19    | 10.85    | -1.60              | -1.07                | -3.61      |
| Kyrgyzstan             | -4.12     | -5.86              | -5.37                        | -4.33         | -4.34                 | .       | -4.46    | 28.09    | -3.43              | -1.48                | -6.87      |
| Lebanon                | -4.12     | -7.48              | -3.97                        | -3.47         | -0.81                 | -       | -3.11    | 8.75     | -3.07              | -1.29                | -5.39      |

|                                |       |        |       |       |        |        |       |        |       |       |       |
|--------------------------------|-------|--------|-------|-------|--------|--------|-------|--------|-------|-------|-------|
| Niger                          | -4.00 | -5.77  | -3.28 | -2.40 | 0.98   | -4.42  | -1.66 | 18.03  | -1.40 | -1.24 | -2.99 |
| France                         | -3.94 | -1.16  | -4.09 | -6.41 | 0.04   | -      | -3.92 | -17.16 | -4.16 | -2.70 | -6.15 |
| Sao Tome and Principe          | -3.93 | -6.51  | -4.43 | -3.81 | -0.24  | -6.02  | -2.68 | 24.45  | -0.40 | -1.73 | -5.10 |
| Morocco                        | -3.92 | -9.64  | -5.42 | -3.77 | 0.01   | -3.62  | -3.15 | 13.93  | -3.59 | -1.85 | -5.68 |
| Malawi                         | -3.90 | -8.02  | -5.46 | -5.11 | -1.20  | -7.05  | -3.99 | 8.35   | -4.37 | -3.49 | -6.24 |
| Slovenia                       | -3.89 | -5.98  | -4.52 | -5.75 | -3.89  | -      | -4.40 | -7.66  | -3.93 | -2.93 | -5.72 |
| Developed                      | -3.88 | -4.32  | -4.69 | -5.36 | -2.37  | -25.41 | -4.45 | -4.50  | -3.47 | -2.96 | -5.71 |
| Singapore                      | -3.87 | -7.46  | -4.41 | -5.34 | -1.55  | -      | -2.51 | 8.84   | -4.85 | -4.20 | -6.38 |
| Spain                          | -3.86 | -2.20  | -4.22 | -6.86 | -1.46  | -      | -4.65 | -14.77 | -4.14 | -3.25 | -5.88 |
| Haiti                          | -3.85 | -7.37  | -4.30 | -2.97 | 0.79   | -7.83  | -1.78 | 5.27   | -3.04 | -0.26 | -6.38 |
| Montenegro                     | -3.84 | -9.00  | -4.15 | -3.13 | -2.15  | -      | -2.54 | 3.49   | -3.62 | -3.20 | -6.58 |
| Armenia                        | -3.83 | -8.54  | -4.24 | -4.34 | -5.21  | -      | -6.91 | 36.69  | -2.89 | 0.76  | -5.21 |
| Nicaragua                      | -3.81 | -10.36 | -6.45 | -3.99 | 0.63   | -14.66 | -3.58 | 3.58   | -3.02 | -0.25 | -6.13 |
| Hungary                        | -3.80 | 0.70   | -5.12 | -5.78 | -2.52  | -      | -4.47 | -10.99 | -3.70 | -3.39 | -6.42 |
| New Zealand                    | -3.80 | -2.37  | -7.33 | -5.68 | -1.48  | -      | -4.42 | -11.44 | -4.46 | -2.95 | -5.13 |
| Cyprus                         | -3.74 | -2.62  | -4.88 | -5.92 | 1.22   | -      | -3.21 | 6.89   | -3.19 | 1.42  | -3.96 |
| Sri Lanka                      | -3.71 | -10.97 | -2.52 | 2.24  | -4.83  | -15.16 | 1.46  | 20.17  | -3.06 | 0.14  | -4.65 |
| Croatia                        | -3.68 | -5.54  | -5.12 | -5.05 | -4.01  | -      | -3.72 | 8.47   | -4.14 | -1.85 | -5.25 |
| Netherlands                    | -3.66 | 1.07   | -3.07 | -6.81 | -3.30  | -      | -4.44 | -7.18  | -4.07 | -3.51 | -5.02 |
| Andorra                        | -3.60 | -2.42  | -5.22 | -6.33 | -0.63  | -      | -4.21 | -8.21  | -4.33 | -2.88 | -5.82 |
| Poland                         | -3.60 | -4.15  | -3.35 | -5.57 | -2.39  | -      | -4.27 | 1.56   | -2.79 | -1.82 | -5.48 |
| Chile                          | -3.56 | -6.79  | -7.13 | -2.61 | -5.06  | -      | -2.80 | 0.70   | -3.43 | -1.65 | -5.79 |
| Norway                         | -3.55 | 1.68   | -5.59 | -6.48 | -1.16  | -      | -4.52 | -8.26  | -3.65 | -2.86 | -6.30 |
| Federated States of Micronesia | -3.54 | -5.41  | -3.01 | -2.28 | -9.54  | -      | -0.32 | 9.02   | -1.46 | 1.48  | -4.31 |
| Switzerland                    | -3.51 | -2.45  | -4.92 | -6.00 | -1.40  | -      | -3.96 | -11.38 | -3.16 | -2.14 | -7.87 |
| The Gambia                     | -3.49 | -8.36  | -3.11 | -2.21 | 0.19   | -4.51  | -2.05 | 20.24  | -1.75 | -0.79 | -3.85 |
| Vietnam                        | -3.45 | -8.93  | -0.78 | -0.87 | -6.59  | -7.10  | -2.86 | 15.12  | -1.40 | 1.27  | -4.09 |
| Uganda                         | -3.41 | -7.59  | -3.70 | -1.85 | 0.03   | -4.41  | -1.94 | 9.07   | -2.31 | -1.67 | -4.26 |
| Austria                        | -3.39 | 1.73   | -4.66 | -6.41 | -2.20  | -      | -4.63 | -8.04  | -4.15 | -2.29 | -5.70 |
| Italy                          | -3.36 | -1.38  | -5.06 | -5.64 | -1.64  | -      | -3.80 | -18.51 | -3.45 | -3.00 | -5.38 |
| Malaysia                       | -3.36 | -7.19  | -3.73 | -2.13 | -5.84  | -11.00 | -2.98 | 6.20   | -2.85 | -0.53 | -5.29 |
| Algeria                        | -3.34 | -8.09  | -4.45 | -3.73 | -0.06  | -6.38  | -2.89 | 9.51   | -3.02 | -1.50 | -5.13 |
| Libya                          | -3.33 | -7.68  | -5.17 | -3.94 | -0.59  | -      | -3.81 | 14.76  | -4.06 | -1.77 | -5.82 |
| Australia                      | -3.30 | 0.08   | -3.90 | -5.90 | 3.14   | -      | -3.55 | -18.28 | -3.71 | -3.01 | -5.03 |
| Belgium                        | -3.30 | 2.44   | -3.27 | -5.60 | -0.39  | -      | -4.00 | -7.20  | -3.38 | -2.47 | -3.66 |
| Ireland                        | -3.28 | -0.09  | -4.02 | -6.02 | 0.74   | -      | -3.96 | -6.89  | -3.84 | -2.51 | -4.72 |
| North Korea                    | -3.25 | -7.91  | -4.71 | -3.65 | -11.71 | -18.79 | -2.94 | 24.98  | -2.97 | -0.99 | -4.94 |
| Israel                         | -3.24 | 0.06   | -4.40 | -4.53 | -1.27  | -      | -4.54 | -3.21  | -2.57 | -2.78 | -5.10 |
| Thailand                       | -3.24 | -8.39  | -3.88 | -1.70 | -5.65  | -15.10 | -1.34 | 13.68  | -3.11 | 0.13  | -3.17 |
| Afghanistan                    | -3.23 | -7.65  | -2.64 | -2.66 | 1.26   | -1.36  | -1.39 | 7.74   | -1.67 | -1.16 | -3.28 |
| Cuba                           | -3.22 | -5.34  | -3.52 | -4.86 | 1.15   | -      | -4.43 | 4.23   | -2.51 | -3.09 | -7.69 |
| Sweden                         | -3.19 | 2.87   | -5.63 | -5.69 | -0.69  | -      | -4.12 | -8.00  | -5.06 | -2.99 | -5.93 |
| Tanzania                       | -3.18 | -5.53  | -3.92 | -3.23 | -0.20  | -5.36  | -2.18 | 10.76  | -2.71 | -1.69 | -3.07 |
| Canada                         | -3.17 | 3.69   | -4.01 | -5.35 | -2.80  | -      | -3.34 | -8.05  | -3.08 | -2.63 | -4.44 |
| Angola                         | -3.16 | -5.12  | -2.48 | -0.41 | 1.47   | -5.42  | -0.91 | 14.39  | -0.55 | -0.02 | -2.76 |
| Belarus                        | -3.16 | -7.81  | -4.68 | -3.55 | -3.02  | -      | -3.40 | 23.20  | -3.09 | -1.81 | -4.50 |
| Taiwan                         | -3.14 | -6.51  | -3.56 | -4.96 | -11.75 | -      | -3.62 | 25.44  | -2.77 | -0.80 | -4.77 |
| Burundi                        | -3.13 | -4.63  | -3.06 | -3.40 | 0.71   | -5.29  | -1.46 | 11.04  | -1.78 | -1.29 | -2.10 |
| Guinea                         | -3.11 | -6.81  | -2.71 | -1.10 | 0.74   | -3.37  | -1.19 | 19.38  | -2.18 | -0.99 | -2.86 |
| Mexico                         | -3.10 | -9.75  | -5.30 | -3.03 | 1.09   | -18.24 | -3.47 | -2.93  | -2.13 | 0.29  | -5.83 |
| Mozambique                     | -3.09 | -6.06  | -4.92 | -4.15 | -0.94  | -5.16  | -1.14 | 31.76  | -3.87 | -2.75 | -5.78 |
| United Kingdom                 | -3.09 | 4.20   | -4.08 | -5.75 | 0.20   | -      | -3.91 | -11.31 | -3.85 | -2.80 | -4.98 |
| Russia                         | -3.07 | -7.84  | -2.07 | -3.89 | -2.48  | -      | -2.85 | 3.47   | -2.46 | -2.23 | -4.64 |
| Cape Verde                     | -3.04 | -7.33  | -3.71 | -3.61 | -0.49  | -7.98  | -2.69 | -4.26  | -2.20 | -0.88 | -4.49 |

|                                  |       |       |       |       |       |        |       |        |       |       |        |
|----------------------------------|-------|-------|-------|-------|-------|--------|-------|--------|-------|-------|--------|
| Burkina Faso                     | -3.01 | -6.99 | -2.82 | 0.04  | 0.74  | -2.76  | -0.92 | 3.24   | -0.95 | -0.77 | -3.18  |
| Mongolia                         | -3.01 | -5.03 | -6.11 | 6.94  | -3.62 | -      | -2.30 | 3.69   | -2.48 | -0.25 | -11.82 |
| Tajikistan                       | -3.00 | -4.67 | -3.69 | -5.42 | -3.37 | -6.42  | -2.55 | 15.04  | -2.13 | 0.02  | -3.06  |
| Developing                       | -2.99 | -4.93 | -3.84 | -2.03 | -1.59 | -2.66  | -3.79 | 12.63  | 0.50  | -1.06 | -3.50  |
| Zambia                           | -2.98 | -6.90 | -5.10 | -1.81 | -1.36 | -6.30  | -3.57 | 4.55   | -4.52 | -3.75 | -5.34  |
| Palestine                        | -2.96 | -9.26 | -4.21 | -2.33 | 0.56  | -      | -3.24 | 17.71  | -2.37 | -1.64 | -4.95  |
| Japan                            | -2.91 | -1.09 | -1.75 | -5.05 | -0.18 | -      | -3.42 | -12.33 | -3.57 | -3.27 | -4.22  |
| Global                           | -2.89 | -4.78 | -3.71 | -2.20 | -1.45 | -2.51  | -3.72 | 12.69  | 0.62  | -1.14 | -3.38  |
| Ukraine                          | -2.86 | -7.28 | -2.72 | -3.80 | -2.38 | -      | -3.33 | 10.53  | -2.57 | -0.44 | -4.07  |
| Dominican Republic               | -2.85 | -8.79 | -2.80 | -1.48 | 1.58  | -3.20  | -2.66 | 9.56   | -2.66 | -1.44 | -6.27  |
| Albania                          | -2.83 | -6.86 | -5.36 | -4.13 | -2.17 | -      | -2.68 | 5.67   | -1.93 | 0.89  | -4.85  |
| Moldova                          | -2.82 | -6.00 | -3.24 | -4.66 | -2.61 | -      | -2.88 | 13.08  | -2.52 | -0.42 | -5.27  |
| United States                    | -2.78 | 1.98  | -3.07 | -4.13 | -3.38 | -      | -2.76 | -11.93 | -2.69 | -1.94 | -4.59  |
| Finland                          | -2.74 | -2.06 | -5.68 | -5.47 | -0.02 | -      | -2.79 | -9.87  | -2.12 | -2.13 | -5.35  |
| Philippines                      | -2.70 | -5.75 | -5.52 | -0.04 | -3.04 | -10.01 | -0.64 | 19.72  | -1.78 | 3.29  | -2.33  |
| Bulgaria                         | -2.68 | -3.88 | -5.59 | -4.64 | -1.64 | -      | -3.02 | 9.26   | -0.19 | -1.41 | -3.86  |
| Ghana                            | -2.66 | -8.30 | -2.81 | -0.57 | -0.29 | -3.14  | -2.50 | 15.66  | 0.06  | -1.00 | -1.35  |
| Djibouti                         | -2.62 | -4.72 | -3.61 | -3.46 | -0.76 | -6.65  | -2.06 | 38.08  | -2.36 | -2.11 | -2.98  |
| Brunei                           | -2.58 | -2.75 | -3.37 | -3.79 | -0.84 | -      | -2.95 | 6.19   | -3.22 | -1.73 | -3.61  |
| Kenya                            | -2.56 | -4.57 | -3.05 | -2.96 | -0.63 | -7.02  | -2.44 | 18.18  | -1.73 | -1.63 | -3.51  |
| Venezuela                        | -2.55 | -5.22 | -4.32 | -3.50 | 1.12  | -6.81  | -2.91 | -2.58  | -2.25 | -0.40 | -4.62  |
| Sierra Leone                     | -2.53 | -6.50 | -2.07 | -1.82 | 0.49  | -4.27  | -1.11 | 23.18  | -0.39 | -0.49 | -2.74  |
| The Bahamas                      | -2.53 | -6.00 | -3.59 | -2.00 | 1.27  | -      | -2.60 | -8.35  | -2.73 | -0.94 | -5.44  |
| Qatar                            | -2.49 | -3.12 | -3.01 | -0.42 | -0.51 | -      | -3.64 | 2.37   | -3.43 | -2.73 | -2.02  |
| Azerbaijan                       | -2.47 | -6.63 | -3.73 | -3.23 | -5.43 | -17.30 | -3.70 | 13.95  | -1.33 | -1.92 | -1.85  |
| Turkmenistan                     | -2.42 | -3.13 | -2.42 | -3.65 | -4.27 | -      | -2.30 | 9.42   | -2.24 | -1.57 | -3.36  |
| Ecuador                          | -2.41 | -8.55 | -2.57 | -1.11 | 1.22  | -12.80 | -1.90 | 3.91   | -2.71 | -0.19 | -3.25  |
| Cote d'Ivoire                    | -2.40 | -5.12 | -2.29 | -1.40 | 0.32  | -4.33  | -1.18 | 12.99  | -0.79 | -0.89 | -1.92  |
| Kuwait                           | -2.38 | -7.18 | -2.72 | -4.02 | 0.41  | -      | -3.59 | 12.20  | -2.65 | -0.83 | -4.31  |
| Samoa                            | -2.37 | -3.57 | -1.35 | -1.00 | -9.15 | -      | -0.78 | 14.67  | -0.21 | 1.23  | -2.69  |
| Togo                             | -2.36 | -4.14 | -2.89 | -2.74 | -0.47 | -4.59  | -2.06 | 19.03  | -0.89 | -1.53 | -2.30  |
| Iraq                             | -2.34 | -4.73 | -3.15 | -3.20 | -0.20 | -      | -2.62 | 13.97  | -2.48 | -1.53 | -3.48  |
| Greece                           | -2.31 | -2.84 | -2.42 | -4.24 | 1.21  | -      | -2.07 | -15.42 | -3.47 | -2.26 | -2.45  |
| Uruguay                          | -2.29 | -3.42 | -1.49 | -2.05 | -8.40 | -      | -3.45 | 1.49   | -1.56 | -1.82 | -6.15  |
| Seychelles                       | -2.28 | -3.25 | -2.48 | -1.85 | -5.26 | -      | -1.56 | 19.23  | -0.09 | -0.91 | -3.53  |
| Mali                             | -2.26 | -4.54 | -1.59 | -0.10 | 1.07  | -2.90  | -0.36 | 16.19  | -0.30 | -0.42 | -1.78  |
| Somalia                          | -2.23 | -1.88 | -2.45 | -2.47 | -0.45 | -3.24  | -1.52 | 17.19  | -1.89 | -2.08 | -1.62  |
| Botswana                         | -2.22 | -4.97 | -2.96 | -1.51 | -0.58 | -2.63  | -1.91 | 17.52  | -2.11 | -0.71 | -3.17  |
| Grenada                          | -2.21 | -6.83 | -3.04 | -1.24 | 1.46  | -      | -1.98 | 3.72   | -2.42 | -0.78 | -6.33  |
| Georgia                          | -2.19 | -5.94 | -5.10 | -2.66 | -3.62 | -      | -2.68 | 16.25  | -0.60 | 1.44  | -2.87  |
| South Sudan                      | -2.19 | -3.30 | -2.49 | -2.10 | -0.36 | -6.12  | -1.52 | 18.30  | -1.89 | -1.94 | -1.97  |
| Nigeria                          | -2.16 | -7.17 | -2.11 | 0.31  | 0.74  | -3.39  | -0.66 | 17.26  | -0.56 | -0.47 | -2.79  |
| Brazil                           | -2.14 | -5.22 | -2.96 | -3.34 | 1.18  | -13.03 | -1.91 | -10.26 | -1.18 | 0.49  | -3.69  |
| Saint Lucia                      | -2.13 | -6.12 | -3.16 | -1.50 | 1.18  | -      | -2.19 | 4.26   | -2.20 | -0.51 | -4.96  |
| Costa Rica                       | -2.10 | -4.75 | -3.57 | -2.85 | 0.91  | -17.69 | -3.29 | -5.06  | -1.38 | -1.28 | -3.93  |
| Pakistan                         | -2.09 | -5.22 | -2.28 | 0.80  | 0.12  | -3.17  | -0.88 | 16.57  | -0.50 | 0.72  | -3.06  |
| Saint Vincent and the Grenadines | -2.06 | -6.75 | -2.91 | -1.17 | 1.23  | -      | -1.79 | 7.45   | -1.96 | -0.94 | -6.11  |
| Solomon Islands                  | -2.06 | -3.60 | -0.91 | 0.95  | -8.33 | -3.00  | 0.98  | 15.91  | 0.62  | 2.47  | -2.01  |
| Belize                           | -2.01 | -5.94 | -3.10 | -0.81 | 0.77  | -6.78  | -1.67 | 21.95  | -1.99 | -0.67 | -5.01  |
| Mauritania                       | -2.01 | -6.56 | -1.25 | 0.02  | 1.10  | -0.60  | 0.11  | 18.46  | 0.78  | 0.89  | -1.79  |
| Syria                            | -1.96 | -9.78 | -8.29 | 2.92  | 0.46  | -4.59  | -3.14 | 17.95  | -3.41 | -8.32 | -2.15  |
| Kiribati                         | -1.94 | -5.84 | -0.53 | 2.15  | -8.26 | -      | 1.22  | -1.50  | -0.55 | 1.86  | -4.22  |
| Paraguay                         | -1.92 | -6.59 | -2.63 | -0.34 | 1.28  | -16.80 | -1.97 | -0.60  | -2.15 | -0.05 | -2.44  |
| Jamaica                          | -1.88 | -5.71 | -3.19 | -0.76 | 1.11  | -      | -1.99 | 1.72   | -2.33 | -0.37 | -4.63  |

|                                  |       |       |       |       |       |        |       |        |       |       |       |
|----------------------------------|-------|-------|-------|-------|-------|--------|-------|--------|-------|-------|-------|
| Democratic Republic of the Congo | -1.85 | -0.23 | -1.08 | -1.33 | 1.21  | -7.18  | -0.87 | 5.43   | 0.03  | 0.12  | -0.90 |
| Argentina                        | -1.83 | -3.44 | -1.22 | -1.10 | -5.79 | -17.12 | -2.63 | 0.72   | -1.98 | -1.44 | -2.40 |
| Jordan                           | -1.83 | -6.13 | -2.67 | -1.67 | -0.09 | -      | -1.92 | 14.48  | -2.53 | -0.40 | -3.42 |
| Namibia                          | -1.83 | -5.29 | -2.75 | -1.53 | -0.83 | -3.33  | -1.63 | 21.70  | -1.80 | -0.62 | -2.96 |
| Barbados                         | -1.81 | -5.61 | -2.56 | -1.03 | 1.59  | -      | -1.92 | -0.62  | -1.83 | -0.29 | -5.02 |
| Slovakia                         | -1.80 | -2.67 | -3.91 | -2.19 | -2.85 | -      | -1.94 | 11.58  | -1.61 | -0.60 | -2.25 |
| Papua New Guinea                 | -1.79 | -3.08 | -1.67 | -0.76 | -7.97 | -0.91  | -0.11 | 24.99  | 0.10  | 1.06  | -2.88 |
| Equatorial Guinea                | -1.67 | -5.62 | -0.93 | 2.45  | 1.52  | -4.34  | 0.05  | 15.66  | 0.11  | 0.80  | -2.66 |
| Colombia                         | -1.66 | -0.23 | -2.95 | -2.42 | 1.09  | -3.07  | -1.50 | 11.24  | -1.05 | -0.45 | -3.55 |
| Congo                            | -1.55 | -0.77 | -1.24 | -1.20 | 0.49  | -3.66  | -0.94 | 6.98   | 0.21  | 0.37  | -1.28 |
| Uzbekistan                       | -1.50 | -6.55 | -1.38 | -1.94 | -4.24 | -      | -1.39 | 22.51  | -1.12 | -0.79 | -3.86 |
| Guinea-Bissau                    | -1.49 | -3.55 | -0.93 | -1.39 | 0.78  | -3.76  | -0.49 | 25.99  | -0.06 | 0.06  | -0.74 |
| Cameroon                         | -1.48 | -4.53 | -1.03 | -1.16 | 0.65  | -3.88  | -0.40 | 25.42  | -0.02 | 0.07  | -1.09 |
| Chad                             | -1.48 | -2.23 | -0.18 | 1.95  | 1.04  | -2.36  | 0.41  | 11.42  | 0.54  | 0.42  | -0.29 |
| Kazakhstan                       | -1.46 | -6.76 | -3.10 | -0.20 | -4.62 | -      | -2.15 | 19.47  | -0.70 | 0.89  | -3.50 |
| Malta                            | -1.45 | -0.26 | -1.76 | -2.40 | 0.25  | -      | -1.83 | 4.80   | -3.22 | -0.92 | -3.13 |
| Mauritius                        | -1.45 | -5.80 | -1.95 | 0.60  | -4.76 | -0.91  | -0.66 | 11.36  | -0.49 | 0.29  | -2.68 |
| Dominica                         | -1.40 | -5.71 | -2.15 | -0.39 | 1.42  | -      | -1.11 | 2.39   | -1.45 | -0.23 | -5.14 |
| Panama                           | -1.39 | -2.93 | -1.59 | -1.77 | 1.63  | -5.93  | -2.27 | -11.82 | -0.88 | 0.39  | -2.96 |
| Suriname                         | -1.36 | -5.46 | -2.19 | -0.44 | 1.03  | -6.99  | -1.06 | -0.13  | -1.37 | 0.14  | -4.41 |
| Gabon                            | -1.25 | -2.12 | -0.30 | -0.32 | 0.97  | -3.88  | -0.04 | 14.46  | 1.54  | 0.76  | -0.70 |
| Central African Republic         | -1.24 | -2.47 | -0.62 | 0.01  | 0.50  | -3.57  | -0.40 | 5.34   | 0.06  | -0.12 | -0.98 |
| Antigua and Barbuda              | -1.13 | -4.60 | -1.87 | -0.08 | 1.71  | -      | -0.92 | 6.33   | -1.33 | -0.13 | -3.87 |
| Marshall Islands                 | -1.09 | -2.82 | -0.24 | 0.57  | -9.18 | -      | 1.52  | 16.06  | 0.53  | 2.74  | -1.10 |
| Tonga                            | -0.66 | -1.30 | 0.12  | 0.77  | -7.10 | -      | 0.81  | 17.08  | 0.41  | 1.63  | -0.39 |
| Guyana                           | -0.64 | -5.02 | -1.55 | 0.89  | 1.24  | -8.18  | -0.15 | 0.16   | -0.51 | 0.91  | -3.41 |
| Trinidad and Tobago              | -0.46 | -4.45 | -1.16 | 0.53  | 1.87  | -      | -0.57 | -2.22  | -0.51 | 0.92  | -3.26 |
| Vanuatu                          | -0.40 | -1.69 | 1.47  | 3.38  | -7.65 | -1.52  | 2.63  | 9.02   | 2.38  | 3.81  | 0.47  |
| Fiji                             | -0.39 | 0.99  | -1.17 | 3.79  | -8.97 | -      | 4.62  | 9.02   | 2.01  | 3.72  | 0.47  |
| South Africa                     | 0.08  | -3.72 | -3.83 | -0.57 | -4.35 | -10.85 | -6.12 | 41.42  | -4.82 | -4.49 | -5.32 |
| Zimbabwe                         | 0.16  | 1.82  | -1.12 | -4.42 | -1.38 | -1.12  | -5.48 | 15.91  | -1.23 | -2.72 | -0.88 |
| Swaziland                        | 1.27  | -4.12 | -0.79 | 0.24  | -1.52 | -2.82  | -1.12 | 49.21  | -0.73 | -0.47 | -1.12 |
| Lesotho                          | 1.44  | -3.82 | -1.02 | 0.29  | -1.74 | -      | -1.15 | 36.87  | -1.05 | -1.07 | -1.66 |



**Table 8. Annual Percent Change in Age-standardized Mortality Rates for the Top 10 Global Causes of Death for Ages 10 to 19, Both Sexes, 1990-2013 (countries ranked from the fastest to slowest decline in all-cause mortality)**

| Location               | All Cause | Road Injuries | HIV/AIDS | Self-Harm | Drowning | Intestinal Infectious | Interpersonal Violence | Lower Respiratory Infections | Diarrheal Diseases | Malaria | Tuberculosis |
|------------------------|-----------|---------------|----------|-----------|----------|-----------------------|------------------------|------------------------------|--------------------|---------|--------------|
| Lebanon                | -5.94     | -2.46         | 7.62     | 0         | -2.62    | -0.46                 | -5.45                  | -3.17                        | -6.36              | -       | -5.04        |
| South Korea            | -5.76     | -5.63         | 5.61     | -1.62     | -7.01    | -1.08                 | -6.02                  | -9.72                        | -12.12             | -21.94  | -12.88       |
| Maldives               | -4.82     | -3.78         | 13.67    | -7.35     | -4.01    | -7.81                 | -1.91                  | -5.79                        | -11.02             | -       | -6.73        |
| Iran                   | -4.64     | -2.59         | 17.21    | 2.96      | -3.59    | 0.14                  | -2.64                  | -3.47                        | -7.43              | -2.92   | -5.45        |
| Portugal               | -4.37     | -5.81         | 1.34     | -4.27     | -5.07    | -2.73                 | -4.69                  | -4.09                        | -0.93              | -       | -6.51        |
| Singapore              | -3.89     | -5.19         | 6.11     | -3.54     | -2.61    | -1.11                 | -5.06                  | -4.41                        | -7.09              | -       | -7.33        |
| Ethiopia               | -3.88     | -2.62         | 13.99    | -2.1      | -3.36    | -1.37                 | -2.56                  | -4.82                        | -6.68              | -7.19   | -5.14        |
| Timor-Leste            | -3.86     | -0.55         | 22.99    | -2.3      | -1.32    | -5.29                 | -0.74                  | -4.31                        | -11.24             | -7.24   | -7.93        |
| Liberia                | -3.83     | -2.26         | 18.7     | 0.05      | -2.27    | -0.59                 | -0.99                  | -2.81                        | -4.25              | -4.11   | -3.22        |
| Nepal                  | -3.8      | -1.49         | 18.25    | -1.5      | -1.66    | -0.84                 | 0.54                   | -4.96                        | -8.66              | -5.61   | -7.85        |
| Cuba                   | -3.79     | -5.73         | 11.12    | -5.34     | -3.36    | 2.06                  | -3.38                  | -3.39                        | -6.04              | -       | -5.42        |
| Taiwan                 | -3.79     | -3.66         | 20.21    | -3.82     | -4.16    | -13.42                | -7.14                  | -4.77                        | -6.65              | -       | -7.65        |
| Luxembourg             | -3.7      | -3.25         | 8.52     | -4.38     | -5.41    | 0.01                  | -5.07                  | -4.1                         | -0.12              | -       | -4.1         |
| Iceland                | -3.68     | -5.06         | 2.31     | -3.21     | -4.73    | 0.78                  | -1.48                  | -6.92                        | -2.26              | -       | -2.82        |
| Estonia                | -3.66     | -5.71         | 23.85    | -3.36     | -4.53    | -1.17                 | -4.54                  | -3.2                         | -7.18              | -       | -3.98        |
| Latvia                 | -3.58     | -5.73         | 9.58     | -2.76     | -3.55    | -2.13                 | -3.82                  | -2.43                        | -6.66              | -       | -3.87        |
| Bahrain                | -3.53     | -3.96         | 13.36    | -1.49     | -5.3     | -0.98                 | -2.06                  | -4.46                        | -5.07              | -       | -5.38        |
| Switzerland            | -3.5      | -5.45         | -3.61    | -2.32     | -3.39    | -0.86                 | -3.22                  | -4.39                        | -2.05              | -       | -2.89        |
| Bangladesh             | -3.48     | -0.31         | 30.41    | -1.98     | -1.44    | -2.31                 | -2.81                  | -2.42                        | -12.49             | -4.55   | -8.31        |
| Germany                | -3.32     | -5.13         | 0.88     | -1.97     | -3.73    | -1.14                 | -4.3                   | -3                           | 2.89               | -       | -4.28        |
| Hungary                | -3.25     | -5.49         | -2.64    | -2.96     | -3.37    | -0.38                 | -2.97                  | -4.27                        | 1.85               | -       | -6.93        |
| China                  | -3.23     | -0.19         | 27.62    | -5.45     | -3.65    | -14.75                | -4.69                  | -5.1                         | -13.09             | -7.72   | -9.39        |
| Spain                  | -3.19     | -4.68         | -6.59    | -2.02     | -3.13    | -0.76                 | -1.55                  | -3.64                        | -0.91              | -       | -5.61        |
| Rwanda                 | -3.17     | -4.43         | 11.38    | -2.96     | -3.82    | -2.08                 | -4.53                  | -5.94                        | -7.63              | -10.55  | -5.34        |
| Egypt                  | -3.13     | 4.06          | 14.66    | 7.1       | -3.38    | -1.19                 | -0.08                  | -8.19                        | -8.79              | -4.3    | -9.17        |
| Bolivia                | -3.06     | -3.77         | 13.98    | -3.68     | -2.65    | 2.21                  | -0.16                  | -4.22                        | -8.09              | -7.16   | -9.38        |
| Sri Lanka              | -3.01     | 3.45          | 17.58    | -2.07     | 3.26     | -6.27                 | -5.02                  | -1.24                        | -9.05              | -13.95  | -6.17        |
| Myanmar                | -2.99     | -0.78         | 14.73    | -0.73     | -1.31    | -5.84                 | -1.77                  | -2.76                        | -8.08              | -4.81   | -5.63        |
| France                 | -2.93     | -4.04         | -0.94    | -2.06     | -2.69    | 0.78                  | -2.86                  | -3.51                        | -0.4               | -       | -4.89        |
| Czech Republic         | -2.92     | -3.29         | 7.27     | -2.22     | -3.19    | -2.95                 | -3.73                  | -2.99                        | 0.11               | -       | -5.31        |
| Turkey                 | -2.92     | -3.11         | 19.67    | 2.2       | -4.04    | -0.34                 | -3.24                  | -5.73                        | -11.24             | -18.01  | -8.54        |
| Australia              | -2.91     | -4.28         | -3.81    | -1.83     | -3.15    | 3.17                  | -3.06                  | -3.07                        | 1.3                | -       | -2.3         |
| Cambodia               | -2.9      | 0.45          | 6.75     | -1.51     | 0.3      | -5.48                 | -0.57                  | -3.56                        | -10.49             | -4.68   | -6.53        |
| Slovenia               | -2.9      | -4.53         | 6.4      | -2.13     | -2.95    | -2.22                 | -3.24                  | -2.86                        | -2.53              | -       | -6.13        |
| Bhutan                 | -2.89     | -2.09         | 13.8     | -1.48     | -2.3     | -0.57                 | -2.65                  | -4.14                        | -6.98              | -8.28   | -8           |
| Bosnia and Herzegovina | -2.89     | 3.15          | 17.43    | -3.48     | 11.42    | -1.18                 | 10.17                  | -5.53                        | -4.93              | -       | -6.61        |
| Peru                   | -2.84     | -0.3          | 5.29     | -2.69     | -2.18    | 1.68                  | -5.26                  | -3.72                        | -10.2              | -8.68   | -8.51        |
| Laos                   | -2.79     | 0.73          | 10.91    | -1.23     | 0.19     | -5.21                 | -0.32                  | -2.47                        | -9.74              | -3.17   | -5.75        |
| Serbia                 | -2.78     | -3            | 5.49     | -2.95     | -3.18    | -1.34                 | -3.4                   | -4.19                        | -3.71              | -       | -4.97        |
| Romania                | -2.74     | -2.22         | 8.38     | -0.71     | -2.78    | -2.03                 | -3.34                  | -4.14                        | -5.31              | -       | -2.69        |
| Sudan                  | -2.73     | -0.85         | 13.59    | -0.99     | -1.59    | 0.75                  | 4.61                   | -2.87                        | -4.57              | -4.56   | -5.39        |
| Denmark                | -2.68     | -4.04         | -0.36    | -2.67     | -1.38    | 1.28                  | -1.65                  | -2.04                        | 1.19               | -       | -1.48        |
| Italy                  | -2.66     | -3.56         | -0.77    | -1.4      | -3.2     | -1.11                 | -4.07                  | -3.7                         | -0.15              | -       | -3.82        |
| United Kingdom         | -2.66     | -4.3          | -1.73    | -3.04     | -3.32    | 0.24                  | -3.64                  | -3.28                        | 4.88               | -       | -4.55        |
| Oman                   | -2.61     | -2.82         | 18       | -0.36     | -1.51    | 0.17                  | -1.03                  | -3.88                        | -4.87              | -5.33   | -5.39        |
| Haiti                  | -2.6      | -3.33         | 8.44     | -0.51     | -1.59    | 0.2                   | -1.92                  | -3.93                        | -7.58              | -7.77   | -7.27        |
| Finland                | -2.59     | -4.25         | 0.59     | -2.36     | -1.97    | 0.19                  | -3.61                  | -5.56                        | -2.08              | -       | -3.6         |
| Burundi                | -2.57     | -3.78         | 13.73    | -1.98     | -2.48    | -1.15                 | -2.07                  | -4.09                        | -5.57              | -6.55   | -4.02        |
| Angola                 | -2.56     | -0.64         | 14.77    | -0.16     | -1.07    | 0.37                  | -0.97                  | -2.74                        | -6.05              | -5.67   | -5.18        |

|                                |       |       |       |       |       |        |       |       |       |        |        |
|--------------------------------|-------|-------|-------|-------|-------|--------|-------|-------|-------|--------|--------|
| Austria                        | -2.56 | -4.65 | 6.2   | -2.07 | -2.97 | -1.43  | -3.1  | -3.16 | 2.21  | -      | -5.75  |
| Cyprus                         | -2.56 | -3.76 | 10.02 | 3.43  | -2.08 | 1.49   | 0.16  | -3.95 | -0.32 | -      | -3.05  |
| Netherlands                    | -2.56 | -4.4  | -3.41 | -0.68 | -2.21 | -2.28  | -1.4  | -1.35 | 2.11  | -      | -3.93  |
| Norway                         | -2.56 | -4.4  | -1.54 | -2.1  | -3.48 | -0.63  | -0.92 | -4.04 | 2.73  | -      | -1.95  |
| Belgium                        | -2.55 | -4.1  | 1.19  | -0.85 | -3.32 | 0      | -2.82 | -2.04 | 3.12  | -      | -2.76  |
| Macedonia                      | -2.54 | -1.83 | 10.09 | -2.14 | -2.59 | -0.52  | -1.52 | -4.7  | -9.2  | -      | -7.29  |
| Eritrea                        | -2.53 | -2.02 | 13.48 | -0.17 | -0.94 | 0.46   | 0.72  | -3.44 | -6.26 | -7.96  | -4.08  |
| Canada                         | -2.52 | -3.74 | -3.11 | -1.84 | -2.8  | -2.53  | -1.89 | -3.35 | 4.09  | -      | -2.38  |
| Poland                         | -2.51 | -3.02 | 2.04  | -0.95 | -3.31 | -1.08  | -4.22 | -2.27 | -3.07 | -      | -6.42  |
| Developed                      | -2.47 | -3.2  | 1.28  | -0.9  | -3.22 | -1.41  | -2.22 | -3.51 | -2.49 | -22.51 | -5.78  |
| Slovakia                       | -2.46 | -3.33 | 7.54  | -2.24 | -2.27 | -2.94  | -2.54 | -4.28 | -2.94 | -      | -5.02  |
| Andorra                        | -2.45 | -4.06 | 3.21  | -1.66 | -2.85 | 0.45   | -2.67 | -3.75 | -0.46 | -      | -4.16  |
| Israel                         | -2.43 | -2.64 | 0     | -2.76 | -4.04 | -0.77  | -1.99 | -3.16 | 1.65  | -      | -3.86  |
| Lithuania                      | -2.43 | -3.44 | 12.43 | -0.83 | -3.11 | -1.31  | -2.82 | -1.37 | -5.8  | -      | -2.69  |
| United Arab Emirates           | -2.43 | -2.37 | 13.56 | -0.34 | -3.3  | -0.45  | -3.16 | -4.1  | -5.73 | -2.83  | -7.11  |
| Madagascar                     | -2.41 | -2.26 | 11.1  | -1.07 | -1.73 | -0.65  | 1.95  | -3.06 | -3.68 | -4.97  | -3.4   |
| Vietnam                        | -2.41 | -0.4  | 13.47 | -3.3  | -3.07 | -8.67  | -1.72 | -0.71 | -9.22 | -7.41  | -6.3   |
| Qatar                          | -2.4  | 0.23  | 9.77  | -3.9  | -3.83 | -1.01  | -2.32 | -3.88 | -3.43 | -      | -11.29 |
| Japan                          | -2.39 | -5.64 | 0.23  | 1.32  | -1.37 | -0.17  | -2.62 | -1.85 | -0.78 | -      | -3.04  |
| India                          | -2.38 | -1.32 | 8.78  | 0.17  | -2.29 | -1.27  | -0.14 | -3.92 | -3.95 | -1.52  | -4.48  |
| Kyrgyzstan                     | -2.37 | -2.88 | 9.9   | -1.42 | -3.41 | -3.69  | -1.63 | -3.68 | -4.68 | -      | -0.18  |
| New Zealand                    | -2.37 | -3.68 | -3.48 | -0.99 | -2.99 | 2.04   | -1.8  | -5.26 | -0.45 | -      | -4.94  |
| Sweden                         | -2.36 | -4.51 | -4.79 | -1.24 | -2.52 | 0.28   | -2.16 | -4.05 | 3.96  | -      | -1.76  |
| Senegal                        | -2.33 | -0.72 | 14.97 | 0.13  | -1.6  | 0.17   | -1.19 | -2.52 | -5.74 | -6.46  | -3.83  |
| Niger                          | -2.3  | -1.01 | 15.93 | 0.98  | -0.96 | 0.19   | -0.59 | -2.27 | -4.97 | -3.64  | -2.75  |
| Comoros                        | -2.27 | -2.68 | 19.92 | -0.62 | -1.43 | -0.19  | 0.67  | -2.96 | -3.07 | -3.58  | -2.45  |
| Ukraine                        | -2.27 | -2.85 | 11.67 | 0.06  | -2.87 | -0.84  | -2.48 | -2.04 | -6.27 | -      | 1.27   |
| Yemen                          | -2.27 | -0.84 | 9.84  | 0.74  | -1.68 | 0.44   | -0.78 | -2.71 | -5.44 | -2.54  | -4.88  |
| Croatia                        | -2.23 | -1.81 | 12.85 | -1.92 | -2.43 | -2.66  | -2.94 | -3.57 | -3.59 | -      | -7.13  |
| Indonesia                      | -2.21 | -0.99 | .     | -0.51 | -0.59 | -5.46  | 0.01  | -1.93 | -6.83 | -5.12  | -4.94  |
| Malta                          | -2.19 | -2.93 | -1.29 | -1.15 | -2.51 | 0.22   | -3.33 | -2.54 | -1.84 | -      | -3.07  |
| Chile                          | -2.18 | -0.33 | 3.4   | -2.5  | -1.9  | -4.58  | -4.29 | -5.97 | -5.19 | -      | -5.32  |
| Benin                          | -2.11 | -0.89 | 16.22 | 0.26  | -2.01 | -0.42  | -1.02 | -2.61 | -5.05 | -4.71  | -3.64  |
| Bulgaria                       | -2.11 | -2.25 | 12.56 | -3.32 | -2.11 | -0.29  | -3.26 | -4.95 | -3.29 | -      | -3.96  |
| Uganda                         | -2.11 | -0.83 | 7.55  | -0.98 | -1.51 | -0.82  | -0.58 | -3.2  | -7.2  | -4.52  | -3.46  |
| Jordan                         | -2.07 | -2.2  | 17.66 | -2.31 | -2.13 | -0.27  | -0.53 | -2.65 | -5.43 | -      | -5.36  |
| Tunisia                        | -2.06 | -1.99 | 8.93  | 0.56  | -2.38 | 0.17   | -1.01 | -3.47 | -7.19 | -      | -7.14  |
| Morocco                        | -2.05 | -1.55 | 18.78 | -0.8  | -1.96 | 0.07   | 3.01  | -3.89 | -7.44 | -2.13  | -6.52  |
| Brunei                         | -2.04 | -3.12 | 12.05 | -1.17 | -1.86 | -0.56  | -3.94 | -1.82 | -0.94 | -      | -2.52  |
| Saudi Arabia                   | -2.04 | -1.73 | 13.24 | 4.98  | -3.11 | 0.13   | 1.92  | -3.69 | -5.35 | -7.07  | -6.65  |
| Montenegro                     | -2.03 | 0.15  | 5.8   | -0.59 | -1.39 | -0.54  | -1.32 | -2.81 | -7.37 | -      | -6.32  |
| United States                  | -2.02 | -2.8  | -2.21 | -1.3  | -2.22 | -3.29  | -3.02 | -2.19 | 3.38  | -      | -3.24  |
| Algeria                        | -2    | -2.12 | 15    | -0.83 | -1.48 | 0.17   | -1.5  | -2.79 | -6.37 | -5.22  | -5.59  |
| Equatorial Guinea              | -1.98 | 0.39  | 17.35 | -0.44 | -1.76 | 0.11   | -2.03 | -2.82 | -8.14 | -5.8   | -5.6   |
| Malaysia                       | -1.93 | -0.85 | 11.85 | -1.01 | -2.4  | -7.8   | -0.2  | -2.03 | -6.31 | -9.99  | -5.29  |
| Burkina Faso                   | -1.91 | 0.62  | 8.12  | -0.68 | -1.33 | -0.65  | -4.16 | -2.86 | -6.83 | -3.33  | -2.84  |
| Honduras                       | -1.9  | -2.11 | 6.98  | -0.59 | -2.59 | 1.02   | 1.5   | -3.99 | -8.21 | -8.4   | -6.59  |
| Federated States of Micronesia | -1.89 | -0.63 | 14.27 | -0.78 | 0.69  | -11.82 | -0.13 | -1.29 | -3.85 | -      | -4.03  |
| Sao Tome and Principe          | -1.89 | -1.11 | 18.95 | 1.29  | -1.18 | -0.29  | -0.28 | -2.28 | -4.39 | -4.52  | -3.7   |
| The Gambia                     | -1.81 | -0.48 | 18.99 | 0.33  | -1.45 | -0.49  | -0.28 | -1.88 | -7.3  | -3.04  | -2.83  |
| Cape Verde                     | -1.8  | -2.25 | 5.04  | -0.97 | -2.12 | -0.77  | 2.91  | -2.78 | -6.43 | -7.38  | -5.07  |
| Developing                     | -1.73 | -0.72 | 14.46 | -1.38 | -2.7  | -1.61  | -0.73 | -2.7  | -4.16 | -2.5   | -3.84  |
| Afghanistan                    | -1.68 | -1.44 | 6.53  | -0.12 | -0.83 | 0.68   | -0.53 | -1.71 | -4.42 | -1.39  | -4.42  |

|                                  |       |       |       |       |       |        |       |       |       |        |       |
|----------------------------------|-------|-------|-------|-------|-------|--------|-------|-------|-------|--------|-------|
| Moldova                          | -1.68 | -2.24 | 13.78 | -0.85 | -2.01 | -1.12  | -2.11 | -2.02 | -4.94 | -      | 1.46  |
| Nicaragua                        | -1.68 | -1.35 | 14.46 | -0.59 | -2.14 | 1.25   | -0.98 | -3.38 | -8.22 | -13.89 | -6.42 |
| Global                           | -1.64 | -1.09 | 14.59 | -1.28 | -2.59 | -1.39  | -0.8  | -2.54 | -3.94 | -2.28  | -3.62 |
| Tanzania                         | -1.64 | -2.63 | 12.47 | -2.81 | -2.52 | -1.76  | -2.62 | -3.84 | -5.16 | -5.48  | -3.37 |
| Russia                           | -1.62 | -1.69 | 9.08  | 0.6   | -1.58 | -1.04  | -1.86 | -1.33 | -7.14 | -      | -0.78 |
| Azerbaijan                       | -1.6  | -2.11 | 11.3  | 0.08  | -2.95 | -4.44  | -3.65 | -2.83 | -6.04 | -16.57 | -1.83 |
| Belarus                          | -1.6  | -1.99 | 17.55 | 0.79  | -2.2  | -1.25  | -2.32 | -2.76 | -6.08 | -      | -1.02 |
| Guinea                           | -1.6  | 0.35  | 18.21 | 0.92  | -0.68 | 0.22   | -0.21 | -1.71 | -5.93 | -2.77  | -2.11 |
| Ireland                          | -1.59 | -3.45 | -0.19 | 0.87  | -2.95 | 0.72   | -0.76 | -2.68 | 0.72  | -      | -3.94 |
| Thailand                         | -1.57 | -0.33 | 0.07  | -1.27 | -1.02 | -7.49  | -0.17 | -2.7  | -8    | -14.89 | -6.19 |
| Kuwait                           | -1.56 | -1.14 | 13.28 | 0.02  | -3.03 | 0.42   | -2.3  | -2.07 | -6.4  | -      | -4.88 |
| Togo                             | -1.56 | -2.52 | 18.58 | -0.51 | -2.66 | -1.36  | -1.87 | -3.06 | -4.28 | -4.96  | -3.77 |
| Ghana                            | -1.54 | 0.31  | 14.31 | -2.51 | -2.96 | -1.49  | -2.58 | -2.87 | -8.53 | -2.2   | -6.07 |
| Palestine                        | -1.53 | -0.95 | 16.6  | 2.11  | -2.21 | 0.28   | 1.24  | -2.79 | -7.34 | -      | -4.51 |
| Mali                             | -1.5  | 0.01  | 14.34 | 0.62  | -0.77 | 0.01   | -0.71 | -1.63 | -4.45 | -2.83  | -3.14 |
| Greece                           | -1.48 | -1.9  | -1.65 | -1.27 | -1.76 | 1.48   | -0.85 | -1.71 | -2.3  | -      | -3.69 |
| The Bahamas                      | -1.48 | -0.97 | -0.33 | -1.95 | -1.85 | 1.51   | -0.31 | -2.64 | -5.3  | -      | -2.58 |
| North Korea                      | -1.47 | -0.98 | 22.54 | -2.11 | -1.38 | -12.24 | -1.05 | -2.65 | -5.98 | -16.82 | -3.45 |
| Somalia                          | -1.47 | -1.3  | 17.76 | -0.67 | -0.9  | -0.71  | 0.55  | -1.71 | -0.71 | -2.62  | -0.26 |
| Mauritania                       | -1.43 | -0.02 | 16.23 | 1.31  | -0.31 | 0.4    | 0.09  | -1.34 | -6.91 | -0.33  | -3.6  |
| Kiribati                         | -1.41 | 2.41  | 2.78  | -1.28 | 1.28  | -10.7  | 4.54  | -0.34 | -5.9  | -      | -5.41 |
| Mongolia                         | -1.41 | 8.77  | 3.4   | -0.76 | -1.2  | -3.22  | 6.08  | -4.54 | -4.52 | -      | -3.5  |
| Saint Lucia                      | -1.4  | -1    | 7.39  | -2.04 | -1.91 | 1.3    | 0.73  | -2.56 | -5.67 | -      | -2.59 |
| Mozambique                       | -1.39 | -1.46 | 23.2  | 1.38  | -0.74 | -1.11  | -1.86 | -3.37 | -4.56 | -4.26  | -5.34 |
| Seychelles                       | -1.39 | -0.99 | 13.37 | -1.52 | -1.01 | -6.75  | -1.32 | -1.45 | -1.78 | -      | -0.22 |
| Tajikistan                       | -1.38 | -4.01 | 12.28 | -1.21 | -1.51 | -2.95  | -0.14 | -1.92 | -3.49 | -5.45  | 1.35  |
| Guatemala                        | -1.37 | 1.44  | 13.72 | -1.52 | -1.14 | 2.52   | 1.5   | -3.75 | -6.84 | -11.89 | -6.27 |
| Papua New Guinea                 | -1.32 | -1.03 | 15.91 | 0.06  | -0.06 | -10.61 | 3.12  | -1.38 | -2.35 | -1.27  | -5.78 |
| Solomon Islands                  | -1.29 | 1.19  | 16.86 | -0.32 | 1.21  | -11.19 | 0.65  | -0.58 | -3.46 | -3.56  | -3.5  |
| Armenia                          | -1.25 | -0.2  | 40.85 | 3.61  | -4.21 | -3.87  | -1.66 | -1.38 | -6.61 | -      | 0.47  |
| Colombia                         | -1.25 | -0.73 | 9.72  | 2.1   | -1.57 | 1.95   | -2.03 | -1.92 | -1.16 | -2.63  | -4.12 |
| El Salvador                      | -1.25 | -1.49 | 4.54  | -3.27 | 0.79  | 1.19   | 0.5   | -1.3  | -8.07 | -16.93 | -6.8  |
| Samoa                            | -1.25 | 0.16  | 16.32 | 0.26  | 0.16  | -11.31 | 0.09  | -0.01 | -2.16 | -      | -2.48 |
| Djibouti                         | -1.22 | -1.92 | 23.71 | -0.69 | -1.48 | -1.4   | 0.71  | -2.75 | -3.73 | -5.78  | -1.67 |
| Sierra Leone                     | -1.22 | -0.6  | 19.57 | 1.07  | -0.82 | 0.38   | 0.41  | -1.09 | -5.65 | -3.98  | -1.47 |
| Libya                            | -1.21 | -0.96 | 16.12 | 0.88  | -2.14 | -0.14  | -0.78 | -2.73 | -5.22 | -      | -5.04 |
| Georgia                          | -1.2  | -2.22 | 21.12 | 0.48  | -2.59 | -3     | -1.62 | -4.14 | -5.61 | -      | -1.95 |
| Uruguay                          | -1.2  | -0.75 | 4.7   | 0.36  | -2.45 | -8.69  | -0.02 | -0.92 | -3.03 | -      | -3.55 |
| Botswana                         | -1.19 | -1.12 | 8.13  | -0.88 | -2.14 | -1.38  | 5.72  | -2.86 | -5.2  | -2.74  | -3.89 |
| Nigeria                          | -1.18 | -0.01 | 16.34 | 0.71  | -1.01 | -0.37  | 0.5   | -2.05 | -7.05 | -3.88  | -4.41 |
| Congo                            | -1.17 | -2.46 | 11.47 | -1.4  | -2.14 | -1.08  | -2    | -2.66 | -2.27 | -4.69  | -3.49 |
| Barbados                         | -1.16 | -0.55 | 3.61  | -1.5  | -1.53 | 1.88   | 0.29  | -2.13 | -5.26 | -      | -1.78 |
| Chad                             | -1.15 | 1.64  | 14.13 | 0.99  | -0.43 | -0.15  | -0.22 | -0.59 | -2.73 | -2.84  | -1.17 |
| Mauritius                        | -1.15 | 1.23  | 13.74 | -2.16 | -0.97 | -6.4   | 0.54  | -2.14 | -6.13 | -1.78  | -5.08 |
| Pakistan                         | -1.11 | 2.01  | 13.71 | 0.85  | -0.4  | -0.23  | 0.08  | -1.47 | -4.99 | -2.5   | -4.5  |
| Saint Vincent and the Grenadines | -1.07 | -0.26 | 8.02  | -2    | -1.1  | 1.65   | 0.26  | -2.1  | -5.99 | -      | -2.9  |
| Turkmenistan                     | -1.07 | -2.62 | 8.98  | -0.51 | -0.82 | -3.07  | -0.27 | -1.26 | -1.9  | -      | -1.49 |
| Antigua and Barbuda              | -1.05 | -0.27 | 5.57  | -1.34 | -1.13 | 1.59   | -0.09 | -1.85 | -4.53 | -      | -1.27 |
| Cote d'Ivoire                    | -1.05 | -1.11 | 15.61 | -0.13 | -1.91 | -1.15  | -0.94 | -2.44 | -5.22 | -5.03  | -2.46 |
| Democratic Republic of the Congo | -1.05 | -0.82 | 9.46  | 0.45  | -0.59 | 0.66   | -0.56 | -0.88 | -0.62 | -6.44  | -2.33 |
| Iraq                             | -1.04 | -1.29 | 13.63 | -0.51 | -1.23 | 0.1    | 1.14  | -1.57 | -3.29 | -      | -2.39 |
| Philippines                      | -1.04 | 2.07  | 11.74 | -4.53 | -0.18 | -3.15  | 1.32  | -2.87 | -3.36 | -9.41  | -3.2  |
| Central African Republic         | -0.95 | -1.35 | 10.03 | -0.88 | -1.72 | -0.92  | -1.41 | -1.92 | -4.04 | -4.36  | -2.31 |

|                     |       |       |       |       |       |        |       |       |       |        |       |
|---------------------|-------|-------|-------|-------|-------|--------|-------|-------|-------|--------|-------|
| Grenada             | -0.95 | -0.04 | 7.22  | -2.11 | -0.95 | 2.02   | 0.09  | -1.9  | -5.95 | -      | -2.24 |
| Kenya               | -0.95 | -2.75 | 16.23 | -2.23 | -3.07 | -2.22  | -2.82 | -3.55 | -4.82 | -7.85  | -4.1  |
| Malawi              | -0.95 | -3.23 | 12.71 | -2.31 | -3.41 | -2.61  | 3.79  | -4.8  | -7.48 | -6.4   | -5.22 |
| Albania             | -0.91 | -1.36 | 8.1   | 0.63  | -1.76 | -1.41  | 0.84  | -3.96 | -5.35 | -      | -5.32 |
| South Sudan         | -0.89 | -0.6  | 17.57 | -0.25 | -0.51 | -0.47  | 1.05  | -1.21 | -1.93 | -4.87  | -1.21 |
| Mexico              | -0.85 | -0.81 | 1.86  | 2.21  | -2.01 | 1.84   | -0.35 | -3.11 | -7.97 | -15.99 | -7.12 |
| Dominican Republic  | -0.79 | 0.85  | 3.01  | -1.68 | -1.71 | 2      | 0.76  | -1.09 | -7.74 | -3.78  | -7.05 |
| Uzbekistan          | -0.79 | -1.45 | 8.8   | -0.09 | -0.92 | -3.36  | -1    | -0.81 | -5.89 | -      | 0.4   |
| Dominica            | -0.78 | 0.17  | 4.16  | -1.94 | -0.73 | 1.6    | 1.06  | -1.68 | -5.39 | -      | -2.3  |
| Suriname            | -0.7  | 0.57  | 8.01  | -0.92 | -0.72 | 1.55   | -0.37 | -1.67 | -5    | -6.93  | -1.43 |
| Costa Rica          | -0.69 | -0.66 | 3.67  | -0.22 | -2.13 | 1.51   | 1.43  | -2.43 | -3.4  | -16.25 | -4.79 |
| Namibia             | -0.68 | -1.03 | 17.73 | -0.59 | -2.08 | -1.44  | -0.84 | -2.29 | -5.21 | -3.78  | -3.3  |
| Cameroon            | -0.67 | -1.12 | 20.49 | 0.97  | -0.96 | -0.76  | -0.39 | -1.38 | -4.7  | -4.48  | -1.65 |
| Vanuatu             | -0.66 | 2.07  | 14.27 | 0.12  | 1.82  | -10.81 | 1.33  | 0.38  | -2.55 | -3.19  | -2.67 |
| Brazil              | -0.63 | -1.09 | 3.22  | -1.41 | -1.56 | 2.01   | 0.85  | -2.41 | -4.86 | -12.27 | -4.07 |
| Gabon               | -0.62 | 0.19  | 13.62 | 0.97  | 0.04  | 0.56   | 0.63  | -0.06 | -1.94 | -3.71  | -1.02 |
| Ecuador             | -0.6  | 0.18  | 7.51  | 1.8   | -1.15 | 2.02   | 1.3   | -1.21 | -7.65 | -11.7  | -5.94 |
| Jamaica             | -0.6  | 1.11  | 2.67  | -0.88 | -1.39 | 1.32   | 1.77  | -2.03 | -4.98 | -      | -1.95 |
| Kazakhstan          | -0.57 | -0.1  | 11.76 | 1.47  | -1.55 | -4.24  | -0.36 | -2.57 | -6.1  | -      | -0.41 |
| Fiji                | -0.54 | 2.8   | 14.23 | 2.09  | 3.89  | -11.7  | -1.54 | -2    | 0.66  | -      | -5.19 |
| Guinea-Bissau       | -0.52 | -0.98 | 24.32 | 0.81  | -0.83 | -0.27  | -0.02 | -0.81 | -3.34 | -4.04  | -1.17 |
| Tonga               | -0.49 | 0.62  | 17.5  | 0.32  | 0.72  | -9.06  | -4.1  | -0.16 | -1.64 | -      | -3.44 |
| Argentina           | -0.44 | 0.38  | 5.18  | 0.49  | -1.81 | -6.52  | -1.16 | 0.39  | -2.19 | -15.79 | -4.34 |
| Panama              | -0.28 | -1.24 | 5.84  | -0.32 | -1.44 | 2.06   | 2.03  | -0.82 | -2.35 | -5.6   | -2.54 |
| Marshall Islands    | -0.27 | 0.93  | 16.34 | -0.01 | 1.7   | -11.84 | 0.17  | 0.22  | -2.21 | -      | -1.88 |
| Belize              | -0.12 | 0.93  | 11.97 | -0.19 | -0.36 | 1.12   | 2.57  | -1.55 | -4.74 | -5.09  | -0.68 |
| Paraguay            | -0.05 | 1.91  | 7.62  | 0.35  | -1.02 | 1.6    | 1.96  | -1.33 | -5.79 | -15.52 | -2.79 |
| Guyana              | -0.03 | 1.8   | 10.12 | -0.16 | 0.27  | 1.81   | 0.29  | -1.15 | -4.98 | -7.87  | -1.19 |
| Trinidad and Tobago | 0.11  | 0.96  | 4.36  | -1.29 | -0.63 | 2.22   | 3.15  | -0.93 | -4.42 | -      | -1.13 |
| Zambia              | 0.16  | 1.48  | 9.57  | 0.64  | -1.83 | -1.74  | -1.86 | -3.06 | -4.79 | -5.14  | -2.75 |
| Venezuela           | 0.29  | -0.63 | 6.79  | 0.82  | -1.93 | 1.77   | 3.03  | -2.51 | -3.36 | -5.39  | -3.78 |
| South Africa        | 0.74  | 1.92  | 28.67 | 2.54  | -5.98 | -4.85  | -0.5  | -3.24 | -2.88 | -9.8   | -3.73 |
| Syria               | 0.85  | 4.33  | 20.98 | -1.21 | -1.81 | 0.64   | -0.85 | -6.1  | -8.78 | -3.99  | -11.8 |
| Swaziland           | 1.88  | -0.06 | 26.14 | -0.14 | -2.26 | -2.41  | -3.13 | -1.14 | -4.94 | -3.49  | -2.09 |
| Zimbabwe            | 2.32  | -4.7  | 14.53 | -6.84 | -6.31 | -3.32  | -2.99 | -1.81 | -0.12 | -3.3   | -0.35 |
| Lesotho             | 2.38  | -0.35 | 26.75 | -0.53 | -2.72 | -3.28  | -1.09 | -1.46 | -4.97 | -      | -1.67 |

**Table 9. Annual Percent Change in Age-standardized Mortality Rates for the Top 10 Global Causes of Death for Ages 0 to 19, Both Sexes, 1990-2013 (countries ranked from the fastest to slowest decline in all-cause mortality)**

| Location                       | All Cause | Lower Respiratory Infections | Preterm Birth Complications | Malaria | Neonatal Encephalopathy | Diarrheal Diseases | Congenital Anomalies | Neonatal Sepsis | Other Neonatal | Protein-Energy Malnutrition | Road Injuries |
|--------------------------------|-----------|------------------------------|-----------------------------|---------|-------------------------|--------------------|----------------------|-----------------|----------------|-----------------------------|---------------|
| Maldives                       | -6.31     | -10.12                       | -4.39                       | -       | -4                      | -15.74             | -5.69                | -3.25           | -5.69          | -9.9                        | -6.41         |
| China                          | -6.01     | -8.92                        | -7.18                       | -9.09   | -3.82                   | -14.31             | -3.16                | -1.75           | -5.79          | -11.44                      | -1.89         |
| Timor-Leste                    | -5.98     | -5.86                        | -3.16                       | -14.56  | -2.22                   | -9.92              | -1.14                | -0.35           | -3.81          | -5.82                       | -2            |
| Iran                           | -5.97     | -9.4                         | -4.19                       | -4.04   | -2.91                   | -11.14             | -4.33                | 8.83            | -5.49          | -11.86                      | -4.69         |
| Oman                           | -5.97     | -9.09                        | -6.64                       | -5.03   | -0.41                   | -12.31             | -3.97                | -2.3            | -7.63          | -9.85                       | -5.8          |
| Nepal                          | -5.86     | -5.83                        | -4.18                       | -8.54   | -4.18                   | -9.81              | -2.23                | -1.04           | -4.52          | -7.02                       | -2.8          |
| Macedonia                      | -5.68     | -8.71                        | -6.13                       | -       | -6.85                   | -14.07             | -3.04                | 2.13            | -7.3           | -7.32                       | -3.69         |
| Turkey                         | -5.63     | -11.46                       | -5.77                       | -20.71  | -6.63                   | -15.88             | -2.03                | -5.63           | -0.54          | -8.41                       | -3.93         |
| Portugal                       | -5.58     | -7.13                        | -8.13                       | -       | -8.21                   | -7.18              | -5.44                | -4.16           | 0.08           | -6.99                       | -6.41         |
| Egypt                          | -5.56     | -8.38                        | -4.22                       | -6.37   | -6                      | -10.64             | -0.08                | -1              | -4.77          | -3.95                       | 2.76          |
| Estonia                        | -5.49     | -6.83                        | -5.77                       | -       | -6.61                   | -10.95             | -4.94                | 1.23            | -10.73         | -10.38                      | -6.5          |
| Bangladesh                     | -5.24     | -6.36                        | -6.12                       | -7.54   | -0.36                   | -15.8              | 0.18                 | -0.23           | -6.55          | -8.63                       | -1.43         |
| Czech Republic                 | -5.16     | -6.3                         | -7.9                        | -       | -7                      | -2.94              | -6.53                | -0.48           | -1.63          | -0.72                       | -4.09         |
| Sri Lanka                      | -5.14     | -3.13                        | -7.45                       | -14.22  | -6.54                   | -14.75             | -0.42                | -2.67           | -7.52          | -10.54                      | 2.35          |
| Saudi Arabia                   | -5.13     | -8.39                        | -6.03                       | -7.64   | -7.83                   | -10.58             | -4.13                | -3.29           | -6.57          | -10.05                      | -3.74         |
| Serbia                         | -5.1      | -7.55                        | -5.87                       | -       | -7.08                   | -7.5               | -4.86                | -4.42           | -4.95          | -4.54                       | -4.41         |
| Peru                           | -5.09     | -7.42                        | -4.06                       | -11.03  | -2.97                   | -13.11             | -0.87                | -0.72           | -4.44          | -9.8                        | -0.9          |
| South Korea                    | -5.05     | -8.99                        | -0.99                       | -21.62  | -1.29                   | -10.38             | -6.38                | 0.69            | 1.6            | -9.38                       | -6.67         |
| Lebanon                        | -5.02     | -6.48                        | -4.34                       | -       | -6.09                   | -9.92              | -1.92                | -0.19           | -2.67          | -5.13                       | -3.06         |
| Tunisia                        | -4.91     | -8.83                        | -5.13                       | -       | -5.79                   | -12.59             | -3.06                | -0.9            | -4.54          | -8.43                       | -3.72         |
| El Salvador                    | -4.9      | -5.32                        | -6.56                       | -19.42  | -7.42                   | -13.61             | -0.04                | -3.71           | -7.31          | -7.03                       | -2.62         |
| Liberia                        | -4.84     | -5.44                        | -2.85                       | -2.99   | -2.87                   | -7.6               | -3.41                | -1.29           | -2.42          | -5.52                       | -4.63         |
| Singapore                      | -4.77     | -5.18                        | -5.17                       | -       | -7.08                   | -8.52              | -5.65                | -2.4            | -3.43          | -7.14                       | -5.3          |
| Luxembourg                     | -4.76     | -5.74                        | -5                          | -       | -5.82                   | -2.78              | -5.72                | 7.64            | -5.77          | -3.17                       | -3.86         |
| Hungary                        | -4.69     | -7.06                        | -5.64                       | -       | -10.24                  | -1.54              | -4.14                | -1.83           | 1.51           | -0.84                       | -5.68         |
| Poland                         | -4.68     | -6.45                        | -6.04                       | -       | -7.85                   | -8.91              | -4.42                | -3.63           | -5.05          | -5.5                        | -3.82         |
| Benin                          | -4.67     | -6.39                        | -2.98                       | -2.96   | -2.46                   | -8.75              | -2.89                | -1.05           | -3.16          | -7.13                       | -3.46         |
| Ethiopia                       | -4.63     | -4.17                        | -3.01                       | -6.07   | -3.68                   | -6.03              | -2.42                | -1.73           | -3.1           | -5.34                       | -3.05         |
| Bosnia and Herzegovina         | -4.59     | -7.1                         | -6.26                       | -       | -6.42                   | -8.69              | -2.72                | -2.65           | -3.3           | -3.65                       | 2.83          |
| Bhutan                         | -4.57     | -5.69                        | -3.78                       | -10.09  | -2.02                   | -8.73              | -0.09                | -0.73           | -4.66          | -5.84                       | -3.52         |
| Bahrain                        | -4.56     | -5.83                        | -5.75                       | -       | -5.06                   | -8.52              | -4.24                | 0.34            | -2.88          | -6.41                       | -4.7          |
| Myanmar                        | -4.49     | -5.24                        | -3.41                       | -7.46   | -2.52                   | -9.32              | -0.6                 | -1.17           | -3.74          | -5.98                       | -1.27         |
| Romania                        | -4.49     | -5.61                        | -4.87                       | -       | -7.09                   | -7.76              | -3.32                | -2.96           | -4.77          | -6.11                       | -3.57         |
| Niger                          | -4.47     | -5.15                        | -2.38                       | 0.31    | -2.24                   | -6.89              | -3                   | -0.48           | -2.42          | -4.68                       | -3            |
| Montenegro                     | -4.44     | -6.01                        | -5.29                       | -       | -5.6                    | -11.43             | -4.05                | -0.46           | -4.23          | -5.1                        | -1.49         |
| United Arab Emirates           | -4.39     | -7.22                        | -6.25                       | -3.39   | -7.5                    | -10.41             | -3.41                | -2.38           | -5.1           | -6.48                       | -3.45         |
| Federated States of Micronesia | -4.31     | -6.47                        | -4.99                       | -       | -3.86                   | -8.23              | -0.85                | -2.33           | -5.73          | -7.43                       | -2.03         |
| Iceland                        | -4.31     | -8.25                        | -4.44                       | -       | -8.01                   | -3.36              | -4.48                | -0.15           | 3.9            | -0.54                       | -5.5          |
| Cambodia                       | -4.28     | -4.57                        | -1.85                       | -7.2    | -1.06                   | -8.99              | 0.11                 | 1.1             | -4.92          | -4.45                       | -0.37         |
| Latvia                         | -4.28     | -5.32                        | -4.89                       | -       | -4.27                   | -8.09              | -4.35                | -0.93           | -6.5           | -6.59                       | -6.15         |
| Laos                           | -4.26     | -3.72                        | -2.07                       | -7.24   | -1.11                   | -8.57              | -0.24                | 0.69            | -3.12          | -4.11                       | -0.18         |
| Bolivia                        | -4.24     | -5.81                        | -2.3                        | -9.06   | -3.23                   | -8.96              | -0.64                | -0.11           | -2.04          | -6.79                       | -5.8          |
| Rwanda                         | -4.24     | -5.16                        | -2.76                       | -4.61   | -2.24                   | -6.82              | -2.28                | -0.79           | -3.7           | -5.96                       | -4.58         |
| Indonesia                      | -4.19     | -6.17                        | -3.3                        | -5.89   | 0.86                    | -7.1               | -0.69                | -1.88           | -5.06          | -5.79                       | -3.53         |
| Eritrea                        | -4.15     | -4.54                        | -1.47                       | -0.6    | -0.92                   | -6.42              | -1.37                | 0.33            | -3.23          | -4.66                       | -3.18         |
| Comoros                        | -4.12     | -5.57                        | -2.93                       | -5.13   | -2.96                   | -5.78              | -2.76                | -1.13           | -3.49          | -6.54                       | -4.39         |
| Nicaragua                      | -4.12     | -4.64                        | -3.22                       | -16.9   | -3.75                   | -11.36             | 0.14                 | -1.6            | -4.27          | -3.45                       | -2.81         |
| Lithuania                      | -4.11     | -4.9                         | -5.76                       | -       | -6.25                   | -9.22              | -4.72                | 0.54            | -5.77          | -10.75                      | -4.22         |
| Armenia                        | -4.1      | -6.39                        | -4.74                       | -       | -4.55                   | -11                | -0.83                | -2.51           | -2.99          | -7.08                       | -1.92         |

|                       |       |       |       |        |       |        |       |       |       |       |       |
|-----------------------|-------|-------|-------|--------|-------|--------|-------|-------|-------|-------|-------|
| Morocco               | -4.06 | -7.26 | -0.75 | -2.96  | -2.08 | -13.86 | -2.02 | -2.11 | -6.36 | -1.01 | -2.98 |
| Norway                | -4.04 | -6.51 | -4.3  | -      | -6.31 | 0.33   | -4.16 | -1.65 | -3.11 | -2.45 | -4.94 |
| Malawi                | -4.02 | -2.74 | -3.34 | -8.7   | -2.84 | -6.51  | -1.93 | -1.14 | -2.74 | -4.05 | -4.07 |
| Guatemala             | -4.01 | -4.01 | -3.46 | -11.67 | -1.26 | -7.31  | 0.6   | -0.98 | -3.99 | -4.27 | 1.05  |
| Madagascar            | -4    | -4.48 | -2.91 | -3.23  | -3.44 | -6.06  | -2.32 | -1.17 | -2.23 | -5.29 | -3.8  |
| Israel                | -3.99 | -5.93 | -5.84 | -      | -6.54 | -3.11  | -3.98 | -2.49 | -1.45 | -3.8  | -3.37 |
| Mozambique            | -3.95 | -6.52 | -3.05 | -1.77  | -2.31 | -7.8   | -2.62 | -0.9  | -3.23 | -8.71 | -3.49 |
| Brazil                | -3.94 | -6.86 | -5    | -13.14 | -4    | -11.3  | -0.65 | -1.44 | -0.13 | -8.24 | -2.38 |
| Libya                 | -3.92 | -7.38 | -4.45 | -      | -5.77 | -10.19 | -2.57 | -1.19 | -3.79 | -5.94 | -2.57 |
| Senegal               | -3.92 | -4.3  | -2.57 | -4.59  | -2.22 | -7.33  | -1.81 | -1.12 | -2.8  | -4.98 | -2.23 |
| Cyprus                | -3.91 | -7.48 | -4.91 | -      | -5.64 | -2.18  | -0.47 | -1.99 | -1.97 | -6.54 | -4.65 |
| Germany               | -3.89 | -4.33 | -4.35 | -      | -3.81 | -0.08  | -3.89 | -2.34 | -1.71 | -4.14 | -5.64 |
| Spain                 | -3.89 | -5.59 | -5.34 | -      | -4.82 | -4.53  | -4.15 | -1.34 | 0.84  | -4.47 | -5.19 |
| Andorra               | -3.88 | -6.23 | -5.14 | -      | -5.72 | -4.43  | -3.63 | -2.07 | -2.46 | -5.25 | -4.71 |
| Slovenia              | -3.87 | -5.59 | -4.59 | -      | -6.33 | -6.38  | -4.05 | -0.08 | 1.36  | -5.67 | -4.92 |
| Vietnam               | -3.86 | 2.59  | -4.95 | -8.43  | -2.11 | -11.34 | -0.82 | -1.87 | -6.7  | -5.59 | -0.76 |
| Yemen                 | -3.83 | -5.65 | -2.01 | -1.81  | -3.03 | -6.36  | -1.72 | 1.22  | -1.9  | -3.15 | -2.19 |
| Cuba                  | -3.8  | -4.21 | -5.52 | -      | -5.64 | -7.28  | -3.31 | -2.11 | 0.62  | -4.09 | -5.59 |
| Kyrgyzstan            | -3.78 | -6.45 | -0.96 | -      | -2.14 | -7.36  | -0.53 | -0.78 | -1.81 | -4.56 | -3.59 |
| Sweden                | -3.72 | -6.41 | -5.18 | -      | -5.27 | 2.39   | -4.29 | -1.53 | -0.52 | -2.55 | -4.88 |
| Italy                 | -3.7  | -6.79 | -4.91 | -      | -5.64 | -3.41  | -3.76 | -1.49 | -0.17 | -0.54 | -3.92 |
| Sudan                 | -3.7  | -4.91 | -2.15 | -4.47  | -2.83 | -6.48  | -1.43 | 0.9   | -1.26 | -3.97 | -2.12 |
| India                 | -3.67 | -5.65 | -3.63 | -5.1   | -1.5  | -6.14  | -0.56 | -0.93 | -4.05 | -2.78 | -2.14 |
| North Korea           | -3.66 | -6.07 | -3.21 | -19.14 | -2.95 | -8.93  | -2.04 | -0.76 | -3.21 | -7.17 | -3.06 |
| Chile                 | -3.65 | -7.95 | -5.33 | -      | -6.38 | -8.82  | -2.15 | -2.69 | -0.47 | -5.47 | -1    |
| Sao Tome and Principe | -3.65 | -4.97 | -2.59 | -3.29  | -2.12 | -7.93  | -1.69 | -0.71 | -2.12 | -5.24 | -2.39 |
| Thailand              | -3.64 | -5.57 | -5.84 | -14.37 | -2.05 | -9.27  | -1.97 | -0.25 | -5.18 | -4.75 | -0.8  |
| Algeria               | -3.62 | -6.15 | -3.06 | -5.48  | -3.4  | -9.22  | -1.65 | -1.12 | -3.34 | -6.75 | -3.65 |
| Denmark               | -3.62 | -4.08 | -2.58 | -      | -4.78 | -0.66  | -4.85 | 4.15  | -3.93 | -0.57 | -4.59 |
| Croatia               | -3.57 | -6.32 | -5.38 | -      | -4.5  | -7.17  | -3.02 | 5.85  | -4.67 | -4.49 | -2.72 |
| Haiti                 | -3.55 | -4.31 | -1.92 | -8.9   | -1.82 | -7     | 0.26  | -0.1  | -2.34 | -2.97 | -2.82 |
| France                | -3.53 | -4.46 | -4.51 | -      | -4.1  | -3.38  | -3.39 | -2.71 | 1.47  | -3.06 | -4.36 |
| Belarus               | -3.52 | -7.7  | -5.33 | -      | -5.34 | -9.87  | -3.22 | -1.6  | -3.53 | -6.33 | -2.54 |
| Mexico                | -3.52 | -5.65 | -3.37 | -18    | -5.01 | -11.1  | -0.21 | -0.32 | -2.95 | -6.2  | -1.63 |
| Cape Verde            | -3.51 | -5    | -3.35 | -9.05  | -2.45 | -8.21  | -0.82 | -1.27 | -2.6  | -5.77 | -2.84 |
| Honduras              | -3.51 | -4.34 | -2.76 | -8.01  | -3.2  | -8.45  | -0.56 | -0.51 | -3.16 | -4.83 | -2.41 |
| Malaysia              | -3.5  | -4.13 | -5.44 | -9.73  | -4.81 | -7.66  | -1.49 | -0.94 | -7.63 | -7.11 | -1.07 |
| Belgium               | -3.48 | -3.46 | -5.24 | -      | -4.02 | -0.59  | -3.44 | -2.07 | -0.4  | -3.17 | -4.4  |
| The Gambia            | -3.44 | -5    | -0.53 | -3.3   | -0.24 | -4.42  | -1.63 | 0.46  | -0.56 | -5.01 | -2.07 |
| Guinea                | -3.42 | -4.02 | -1.69 | -2.29  | -1.62 | -7.49  | -2.01 | -0.25 | -2.03 | -3.76 | -1.55 |
| Tajikistan            | -3.42 | -4.71 | -1.58 | -6.3   | -2.41 | -6.44  | 0.77  | 0.16  | -0.39 | -0.03 | -4.81 |
| Palestine             | -3.41 | -6    | -1.97 | -      | 1.31  | -10.57 | -3.1  | 4.19  | -0.75 | -4.47 | -2.12 |
| Austria               | -3.38 | -5.27 | -3.66 | -      | -5.28 | 1.77   | -3.18 | -1.94 | -0.85 | -2.81 | -4.91 |
| Developed             | -3.35 | -5.7  | -3.87 | -22.58 | -5.26 | -6.2   | -3.22 | -1.66 | -1.49 | -4.85 | -3.65 |
| Moldova               | -3.35 | -4.41 | -4.15 | -      | -6.84 | -7.34  | -1.97 | -3.26 | 0.12  | -8.9  | -3.31 |
| Mongolia              | -3.35 | -5.76 | -2.16 | -      | -1.87 | -12.69 | 1.24  | -0.22 | -1.64 | -9.17 | 7.13  |
| Azerbaijan            | -3.3  | -5.13 | -2.01 | -17.86 | -1.24 | -7.89  | -0.91 | 0.2   | -0.58 | -5.52 | -2.59 |
| Greece                | -3.3  | -2.81 | -4.3  | -      | -4.73 | -4.83  | -3.84 | -6.83 | 0.19  | -6.42 | -2.63 |
| Angola                | -3.29 | -3.33 | -1.42 | -1.76  | 0     | -5.35  | -0.39 | 1.06  | -3.54 | -3.34 | -1.17 |
| Australia             | -3.27 | -4.02 | -4.67 | -      | -3.25 | -0.38  | -3.38 | -2.65 | 0.9   | -3.99 | -4.53 |
| Finland               | -3.24 | -6.85 | -4.44 | -      | -4.21 | -3.16  | -3.54 | 2.27  | -2.7  | -4.33 | -4.59 |
| Netherlands           | -3.23 | -3.23 | -4.34 | -      | -4.17 | 0.68   | -3.55 | -1.25 | 1.05  | -3.03 | -4.78 |
| Russia                | -3.23 | -4.45 | -5.56 | -      | -7.66 | -7.56  | -3    | -1.97 | -0.36 | -3.14 | -2.29 |

|                                  |       |       |       |        |       |        |       |       |       |       |       |
|----------------------------------|-------|-------|-------|--------|-------|--------|-------|-------|-------|-------|-------|
| Uganda                           | -3.21 | -3.38 | -1.92 | -1.99  | -1.37 | -7.91  | -0.95 | -0.06 | -1.94 | -3.58 | -1.38 |
| Zambia                           | -3.18 | -4.09 | -2.93 | -3.31  | -1.82 | -6.23  | -1.78 | -0.72 | -1.93 | -3.77 | -0.83 |
| Albania                          | -3.17 | -5.89 | -3.24 | -      | -4.53 | -7.94  | 1.03  | -0.09 | -0.15 | -4.1  | -2.29 |
| Burkina Faso                     | -3.17 | -3.29 | -2.01 | -1.08  | -2.66 | -5.69  | -1.71 | -1.15 | -3.37 | -3.1  | -1.18 |
| Burundi                          | -3.11 | -3.76 | -1.41 | -3.07  | -1.25 | -4.7   | -1.62 | -0.42 | -2.48 | -3.39 | -3.97 |
| Switzerland                      | -3.11 | -4.7  | -2.18 | -      | -3.24 | -1.97  | -3.18 | -0.31 | -0.21 | 0.25  | -5.45 |
| Qatar                            | -3.1  | -3.5  | -3.8  | -      | -4.49 | -4.31  | -2.85 | -9.34 | -3.1  | -4.74 | -0.09 |
| Tanzania                         | -3    | -3.27 | -1.67 | -4.95  | -1.2  | -6.12  | 0.04  | -0.52 | -2.09 | -2.98 | -2.4  |
| Slovakia                         | -2.95 | -5.39 | -3.67 | -      | -2.43 | -3.91  | -2.05 | -1.66 | -5.96 | -4.87 | -3.14 |
| Syria                            | -2.92 | -9.22 | -7.19 | -4.89  | -8.21 | -15.82 | -3.99 | -4.18 | -6.83 | -0.16 | 3.56  |
| Japan                            | -2.9  | -2.62 | -4.57 | -      | -4.8  | -1.62  | -2.91 | -1.75 | -1.68 | -0.65 | -5.54 |
| New Zealand                      | -2.89 | -5.54 | -3.12 | -      | -4.06 | -0.63  | -2.81 | -0.64 | 1.79  | -4.12 | -4    |
| Developing                       | -2.86 | -3.91 | -3.34 | -0.51  | -1.37 | -5.04  | -1.13 | 0.15  | -3.36 | -2.13 | -1.46 |
| Dominican Republic               | -2.86 | -2.31 | -2.6  | -3.57  | -3.16 | -10.01 | -0.23 | -0.03 | -2.3  | -7.81 | -0.03 |
| United Kingdom                   | -2.86 | -3.77 | -2.31 | -      | -4.93 | 2.48   | -2.5  | -1.76 | -1.43 | -4.55 | -4.53 |
| Uruguay                          | -2.85 | -2.73 | -4.41 | -      | -6.27 | -6.31  | -2.1  | -1.69 | -2.11 | -7.03 | -1.24 |
| Ireland                          | -2.84 | -3.87 | -3.6  | -      | -4.08 | -0.07  | -2.76 | 1.39  | 0.32  | -4.35 | -4    |
| Belize                           | -2.83 | -4.95 | -3.96 | -5.62  | -3.15 | -6.87  | -0.95 | -1.26 | -1.41 | -5.19 | 0.02  |
| Afghanistan                      | -2.82 | -2.48 | -0.75 | -1.6   | -1.27 | -4.81  | -1.01 | 2.33  | -2.2  | -0.94 | -2.04 |
| The Bahamas                      | -2.82 | -4.34 | -3.64 | -      | -3.81 | -5.98  | -1.07 | -1.55 | -1.36 | -4.67 | -1.37 |
| Global                           | -2.8  | -3.86 | -3.31 | -0.41  | -1.38 | -4.96  | -1.23 | 0.18  | -3.27 | -2.05 | -1.64 |
| Ukraine                          | -2.8  | -5.98 | -3.06 | -      | -3.64 | -7.25  | -2.32 | 0.26  | -1.45 | -5.65 | -3.1  |
| South Sudan                      | -2.78 | -3.06 | -1.98 | -4.8   | -0.92 | -4.16  | -2.27 | -0.6  | -2.81 | -3.9  | -2.09 |
| Kuwait                           | -2.76 | -5.35 | -3.04 | -      | -6.49 | -8.69  | -1.7  | -2.27 | -7.99 | -7.28 | -2.27 |
| Grenada                          | -2.75 | -3.99 | -4.19 | -      | -3.31 | -7.13  | -1.13 | -1.12 | -2.54 | -4.82 | -0.5  |
| Philippines                      | -2.72 | -5.33 | -2.13 | -9.97  | 1.29  | -4.7   | 1.12  | 2.55  | -4.94 | -4.75 | 1.33  |
| Turkmenistan                     | -2.72 | -3.32 | -1.03 | -      | -1.99 | -4.72  | -1.17 | 0.68  | 0.28  | -3.82 | -3.36 |
| Sierra Leone                     | -2.71 | -3.13 | -1.56 | -2.54  | -1.52 | -7.05  | -1.38 | -0.25 | -1.52 | -2.7  | -1.86 |
| Namibia                          | -2.69 | -3.79 | -1.99 | -0.9   | -1.31 | -5.91  | -0.52 | 0.06  | -2.44 | -4.7  | -1.75 |
| Costa Rica                       | -2.62 | -4.91 | -4.59 | -17.26 | -4.14 | -6.28  | -1.75 | -2.6  | -1.8  | -6.85 | -1.38 |
| Bulgaria                         | -2.57 | -4.55 | -1.97 | -      | -1.31 | -3.09  | -2.43 | 0.71  | -5.45 | 1.9   | -2.93 |
| Georgia                          | -2.57 | -7.1  | -0.78 | -      | -3.65 | -7.35  | -0.34 | 2.31  | 5.35  | 2.09  | -2.53 |
| Argentina                        | -2.55 | -3.17 | -3.7  | -17.07 | -4.62 | -6.79  | -1.23 | -1.66 | -2.48 | -7.29 | -0.18 |
| Venezuela                        | -2.55 | -3.76 | -4.13 | -6.37  | -4.21 | -7.61  | -0.66 | -1.47 | -3.61 | -4.44 | -1.46 |
| Mali                             | -2.53 | -3.64 | -1.56 | 0.62   | -1.19 | -5.07  | -1.98 | -0.06 | -2.23 | -3.22 | -1.3  |
| Ecuador                          | -2.52 | -2.26 | -1.59 | -11.68 | -1.71 | -8.66  | 1.67  | -0.31 | -2.58 | -5.02 | -0.11 |
| Djibouti                         | -2.5  | -3.78 | -1.52 | -0.8   | -1.46 | -4.97  | -2.08 | -0.64 | -2    | -4.22 | -3.08 |
| Jordan                           | -2.5  | -3.82 | -2.94 | -      | -3.11 | -8.18  | -0.63 | -0.43 | -3.5  | -5.23 | -2.1  |
| Iraq                             | -2.47 | -3.94 | -1.99 | -      | -2.49 | -6.03  | -1.46 | -0.87 | -2.11 | -4.09 | -2.73 |
| Solomon Islands                  | -2.46 | -3.14 | -1.55 | -4.7   | -0.92 | -4.67  | 0.75  | 0.33  | -3.71 | -3.81 | 0.79  |
| Samoa                            | -2.44 | -3.41 | -3.75 | -      | -2.83 | -5.01  | -0.54 | -1.7  | -3.83 | -5    | -0.45 |
| Colombia                         | -2.41 | -3.98 | -2.91 | -1.63  | -3.87 | -7.46  | 0.26  | 0.32  | -0.48 | -3.04 | -1.53 |
| Ghana                            | -2.38 | -2.74 | -1.95 | -2.14  | -0.78 | -8.21  | -0.24 | 0.63  | -1.2  | -0.27 | -0.29 |
| Botswana                         | -2.36 | -3.31 | -2.08 | -1.28  | -0.86 | -4.8   | -0.17 | 0.11  | -2.12 | -4.35 | -1.15 |
| Somalia                          | -2.29 | -2.67 | -1.59 | -1.56  | -1.18 | -2.36  | -2.28 | -0.88 | -1.25 | -3.02 | -2.32 |
| Saint Lucia                      | -2.28 | -3.22 | -3.22 | -      | -2.01 | -6.06  | -0.33 | -1.04 | -0.08 | -4.28 | -1.12 |
| United States                    | -2.27 | -3.42 | -2.61 | -      | -2.71 | -1.43  | -2.03 | -0.85 | -1.54 | -2.44 | -2.96 |
| Canada                           | -2.24 | -3.19 | -1.94 | -      | -1.8  | 1.69   | -2.68 | 0.01  | 1.58  | -3    | -3.89 |
| Kiribati                         | -2.24 | -2.01 | -2.18 | -      | -2.67 | -7.32  | 1.1   | 1.57  | -1.44 | -2.9  | 1.72  |
| Nigeria                          | -2.22 | -2.64 | -1.54 | -0.78  | -1.5  | -6.57  | -0.7  | 0.21  | -2.3  | -2.81 | 0.47  |
| Paraguay                         | -2.19 | -4.53 | -1.9  | -16.68 | -2.18 | -7.6   | 1.04  | -0.93 | -0.75 | -2    | 1.24  |
| Taiwan                           | -2.16 | -2.62 | -2.84 | -      | -1.83 | -3.97  | -0.42 | 3.16  | 0.37  | -4.33 | -3.35 |
| Saint Vincent and the Grenadines | -2.12 | -3.02 | -3.1  | -      | -2.26 | -6.99  | -0.79 | 2.54  | 6.62  | -4.43 | -0.61 |

|                                  |       |       |       |       |       |       |       |       |       |       |       |
|----------------------------------|-------|-------|-------|-------|-------|-------|-------|-------|-------|-------|-------|
| Kenya                            | -2.11 | -2.34 | -1.47 | -5.59 | -1.19 | -2.74 | -0.58 | -0.11 | -1.03 | -1.98 | -2.42 |
| Papua New Guinea                 | -2.08 | -2.15 | -0.55 | -2.5  | -0.11 | -4.62 | 0.06  | 0.95  | -2.57 | -2.88 | -1.29 |
| Togo                             | -2.08 | -3.1  | -1.1  | -0.83 | -1.19 | -3.67 | -1.3  | 0.19  | -1.61 | -3.27 | -2.87 |
| Kazakhstan                       | -2.07 | -5.46 | -0.9  | -     | -2.02 | -9.03 | 0.41  | 1.54  | 0.65  | -3.24 | -0.09 |
| Cote d'Ivoire                    | -2.06 | -2.33 | -0.82 | -2.13 | -1.01 | -4.45 | -0.86 | 0.28  | -1.38 | -1.79 | -1.55 |
| South Africa                     | -2.06 | -2.77 | -1.65 | -7.48 | -0.83 | -4.68 | -2.41 | -0.37 | -2.9  | -5.93 | 1.12  |
| Barbados                         | -2.01 | -2.98 | -2.86 | -     | -2.54 | -5.43 | -0.4  | -0.59 | -0.68 | -4.13 | -0.7  |
| Equatorial Guinea                | -1.96 | -1.69 | -1.54 | -2.01 | 0.58  | -6.75 | 1.12  | 0.89  | -2.45 | -3.38 | 1.42  |
| Jamaica                          | -1.95 | -2.96 | -2.38 | -     | -2.19 | -7.59 | 0.26  | -0.26 | -1.35 | -5.94 | 0.47  |
| Mauritania                       | -1.85 | -1.57 | -0.79 | 0.76  | -0.13 | -5.74 | 0.35  | 1.28  | -2.41 | -1.5  | -0.15 |
| Mauritius                        | -1.84 | -2.64 | -3.38 | -0.86 | -3.08 | -7.16 | 0.9   | -1.13 | 2.03  | -3.74 | 1.03  |
| Democratic Republic of the Congo | -1.8  | -1.69 | -0.75 | -5.09 | -0.84 | -0.39 | -0.57 | 0.26  | -2.2  | -0.53 | -1.43 |
| Uzbekistan                       | -1.78 | -2.17 | -1.1  | -     | -0.86 | -9.51 | 0.49  | 0.43  | -0.63 | -7.12 | -1.77 |
| Congo                            | -1.74 | -1.61 | -1.38 | -4.92 | -0.78 | -1.86 | 0.28  | 0     | -1.75 | -1.54 | -1.88 |
| Pakistan                         | -1.73 | -1.71 | -1.52 | -5.84 | 0.4   | -3.84 | 0.14  | 2.14  | -3.01 | -2.02 | 1.4   |
| Guinea-Bissau                    | -1.67 | -2.8  | -0.86 | -0.2  | -0.81 | -4.26 | -0.89 | 0.45  | -1.55 | -2.07 | -1.48 |
| Seychelles                       | -1.67 | -1.67 | -2.69 | -     | -1.88 | -1.96 | -0.97 | -0.63 | -1.61 | 1.33  | -1.03 |
| Malta                            | -1.59 | -1.63 | -3.05 | -     | -2.37 | -1.15 | -0.47 | 1.42  | 8.43  | -4.33 | -2.8  |
| Chad                             | -1.56 | -0.93 | -0.82 | -0.1  | -0.21 | -2.28 | -0.38 | 0.63  | -0.8  | -0.92 | 1.3   |
| Marshall Islands                 | -1.52 | -2.56 | -0.44 | -     | -0.44 | -3.62 | 0.95  | 0.07  | -2.73 | -2.91 | 0.25  |
| Panama                           | -1.46 | -1.28 | -2.85 | -5.83 | -2.05 | -3.23 | 0.05  | -0.62 | -2.02 | -1.95 | -1.4  |
| Gabon                            | -1.44 | -1.23 | -1.26 | -3.96 | -0.73 | -3.61 | 0.53  | 0.08  | -1.42 | -1.26 | -0.29 |
| Dominica                         | -1.42 | -2.09 | -2.43 | -     | -0.7  | -5.53 | 0.12  | 0.04  | -0.6  | -3.23 | 0.04  |
| Brunei                           | -1.35 | -1.56 | -1.46 | -     | -1.73 | -1.03 | -0.49 | -0.34 | -0.47 | -2.98 | -3.1  |
| Cameroon                         | -1.32 | -1.31 | -0.54 | -1.6  | -0.62 | -4.09 | 0.1   | 0.87  | -0.66 | -0.99 | -1.27 |
| Guyana                           | -1.23 | -2.32 | -1.96 | -8.86 | -0.3  | -5.39 | 1.7   | 0.73  | 0.56  | -3.7  | 1.37  |
| Central African Republic         | -1.2  | -0.89 | -0.44 | -2.07 | -0.26 | -2.81 | -0.3  | 0.44  | -0.77 | -0.21 | -0.54 |
| Suriname                         | -1.2  | -1.8  | -1.34 | -6.26 | -0.81 | -5.99 | 0.79  | 0.35  | -0.38 | -2.72 | 0.26  |
| Antigua and Barbuda              | -1.06 | -1.37 | -1.76 | -     | -0.93 | -3.89 | 0.42  | -0.24 | 0.26  | -2.38 | -0.06 |
| Trinidad and Tobago              | -0.78 | -2.06 | -1.68 | -     | -1.98 | -4.02 | 0.97  | 0.12  | 0.62  | -2.07 | 0.93  |
| Tonga                            | -0.71 | -0.93 | -0.53 | -     | 1.33  | -1.86 | 0.94  | 0.51  | -2.21 | -0.78 | 0.64  |
| Vanuatu                          | -0.34 | 0.05  | 0.75  | -2.15 | 1.33  | -1.4  | 2.39  | 1.83  | -1.78 | 0.05  | 2.47  |
| Fiji                             | -0.2  | -1.77 | -0.55 | -     | -0.53 | 1.2   | 3.61  | 0.78  | -1.76 | -0.66 | 3.31  |
| Swaziland                        | 0.29  | 0.38  | 0.17  | -2.54 | 0.9   | -1.85 | 1.19  | 1.73  | -0.66 | -0.15 | 0.59  |
| Lesotho                          | 0.35  | 0.39  | -0.08 | -     | 0.67  | -1.9  | 0.78  | 1.16  | -0.54 | -0.06 | 0.47  |
| Zimbabwe                         | 0.44  | -1.21 | 0.1   | -0.5  | 2.53  | 3.56  | -0.16 | 1.17  | -5.65 | -0.31 | -2.29 |



























Table with columns for Country, Year 2015, Year 2016, Year 2017, Year 2018, Year 2019, Year 2020, and Year 2021. Rows include various countries such as Argentina, Australia, Austria, Bahrain, Bangladesh, Barbados, Belarus, Belgium, Belize, Benin, Bermuda, Bolivia, Bosnia and Herzegovina, Botswana, Brazil, Brunei Darussalam, Bulgaria, Burkina Faso, Burundi, Cambodia, Cameroon, Canada, Chile, China, Colombia, Costa Rica, Croatia, Cyprus, Czechia, Denmark, Dominican Republic, Ecuador, Egypt, El Salvador, Estonia, Ethiopia, Finland, France, Germany, Ghana, Greece, Guatemala, Guinea, Haiti, Honduras, Hungary, Iceland, India, Indonesia, Israel, Italy, Jamaica, Japan, Jordan, Kazakhstan, Kenya, Kuwait, Kyrgyzstan, Laos, Latvia, Lebanon, Liberia, Lithuania, Luxembourg, Madagascar, Malawi, Malaysia, Maldives, Mali, Malta, Mauritania, Mauritius, Mexico, Moldova, Monaco, Mongolia, Montenegro, Morocco, Mozambique, Myanmar, Namibia, Nepal, Netherlands, New Zealand, Nicaragua, Niger, Nigeria, North Macedonia, Norway, Oman, Pakistan, Panama, Paraguay, Peru, Philippines, Poland, Portugal, Qatar, Romania, Russia, Rwanda, Saudi Arabia, Saint Kitts and Nevis, Saint Lucia, Saint Vincent and the Grenadines, Samoa, Sao Tome and Principe, Saudi Arabia, South Africa, South Korea, South Sudan, Spain, Sri Lanka, Sudan, Suriname, Swaziland, Sweden, Switzerland, Taiwan, Tajikistan, Tanzania, Thailand, The Bahamas, The Gambia, Timor-Leste, Togo, Tonga, Trinidad and Tobago, Turkey, Turkmenistan, Uganda, Ukraine, United Arab Emirates, United Kingdom, United States, Uruguay, Uzbekistan, Vanuatu, Venezuela, Vietnam, Yemen, Zambia, Zimbabwe.
